# Supplementary material
Source: Royal Society of Chemistry journal article supplement (doi:10.1039/d6cc01568a)

Supporting Information

**Silver-catalyzed stereospecific (3+3)-cross-dimerization of oxaziridines with aziridines:  
divergent access to functionalized oxadiazines**

**Table of Contents**

|    |                                                                                            |       |
|----|--------------------------------------------------------------------------------------------|-------|
| 1  | General Information                                                                        | 2     |
| 2  | Sample Preparation for Crystal Growth                                                      | 2     |
| 3  | Crystal Data and Structure Refinement of ( $\pm$ )- <b>3ka</b> and ( $\pm$ )- <b>4pa</b>   | 2-5   |
| 4  | Examples of Biologically Important [1,2,4]/[1,2,5]-Oxadiazine Scaffolds                    | 5     |
| 5  | Optimization of the Reaction Conditions                                                    | 5-6   |
| 6  | General Procedure for the Synthesis of Oxaziridines and Aziridines                         | 6-8   |
| 7  | Characterization Data of Starting Materials                                                | 8-10  |
| 8  | General Procedure for the Synthesis of [1,2,4]/[1,2,5]-Oxadiazines                         | 10    |
| 9  | General Procedure for the Stereospecific Synthesis of [1,2,4]/[1,2,5]-Oxadiazines          | 10    |
| 10 | Characterization Data of ( $\pm$ )- <b>3aa-la</b> and ( $\pm$ )- <b>4na-rs</b>             | 10-28 |
| 11 | Effect of Catalysts on Stereospecific Synthesis of Oxadiazines                             | 28-29 |
| 12 | HPLC Chromatograms                                                                         | 29-35 |
| 13 | Mechanistic Studies                                                                        | 35-36 |
| 14 | Scale-up Synthesis and Post-Synthetic Transformations                                      | 37-39 |
| 15 | References                                                                                 | 40    |
| 16 | Copies of NMR ( $^1\text{H}$ , $^{13}\text{C}\{^1\text{H}\}$ and $^{19}\text{F}$ ) Spectra | 40-97 |

**General Information.** AgNTf<sub>2</sub> (96%), AgOTf (≥99%), AgBF<sub>4</sub> (98%), AgOAc (99%), Cu(OTf)<sub>2</sub> (98%), Ni(OTf)<sub>2</sub> (96%), Yb(OTf)<sub>3</sub> (99.99%), Zn(OTf)<sub>2</sub> (98%), Ni(ClO<sub>4</sub>)<sub>2</sub>•6H<sub>2</sub>O, Pd(PPh<sub>3</sub>)<sub>4</sub> (99%), PdCl<sub>2</sub>(PPh<sub>3</sub>)<sub>2</sub> (98%), CuI (98%), 3-chloroperbenzoic acid (≤77%), chloramine-T trihydrate (98%), 2,6-di-*tert*-butyl-4-methylphenol (BHT) (≥99.0%), 2,2,6,6-tetramethyl-1-piperidinyloxy (TEMPO) (98%), (*R*)-(-)-2-phenylglycinol (98%), (*S*)-(+)-2-phenylglycinol (98%) of Aldrich, SRL Chemicals, BLD pharm and TCI Chemicals were used as received. Tetrahydrofuran (THF), toluene, (CH<sub>2</sub>Cl)<sub>2</sub>, CH<sub>2</sub>Cl<sub>2</sub>, dimethyl sulfoxide (DMSO), *N,N*-dimethylformamide (DMF) and CH<sub>3</sub>CN were dried prior to use according to the standard procedure. Merck silica gel G/GF 254 plates used for analytical TLC and SRL silica gel (100-200 mesh) used for column chromatography. NMR (<sup>1</sup>H, <sup>13</sup>C{<sup>1</sup>H} and <sup>19</sup>F) spectra have been recorded with Bruker Avance III 600, 500 and 400 MHz spectrometers using CDCl<sub>3</sub> and DMSO-*d*<sub>6</sub> as solvent with Me<sub>4</sub>Si as an internal standard. Chemical shifts (δ) and spin-spin coupling constant (*J*) are reported in ppm and in Hz, respectively, and peak patterns are shown as follows: s = singlet, d = doublet, t = triplet, m = multiplet, q = quartet, dd = doublet of doublets. Melting points have been determined using a Büchi B-540 apparatus and are uncorrected. FT-IR spectra have been collected on Perkin Elmer IR spectrometer. HPLC analysis has been carried out using Waters-2489 with Daicel CHIRAPAK AD-H and YMC Chiral ART Cellulose-SC columns utilizing *iso*-propanol and hexane as eluent. Optical rotation was determined using a Rudolph Autopol I Automatic Polarimeter. Quadrupole time-of-flight electrospray ionization (ESI) mass spectrometer (Agilent 6546) has been used for HRMS. Single crystal X-ray data have been collected on a Bruker SMART APEX equipped with a CCD area detector using Mo/Kα radiation and the structure has been solved by direct method using SHELXL-2019/1 and SHELXL 2018/3 (Göttingen, Germany).

**Sample Preparation for Crystal Growth.** The compounds (±)-**3ka** and (±)-**4pa** were dissolved in 1 mL of CH<sub>3</sub>CN and kept for slow evaporation. Block shaped crystal was formed which was subjected to X-ray diffraction analysis.

#### Crystal Data and Structure Refinement for (±)-**3ka**

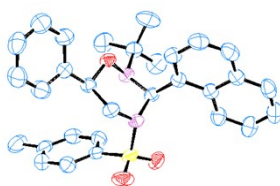

**Figure S1.** ORTEP diagram of 2-(*tert*-butyl)-3-(naphthalen-1-yl)-6-phenyl-4-tosyl-1,2,4-oxadiazinane (±)-**3ka** (CCDC 2426695) with 50% ellipsoid. H-omitted for clarity.

|                                                   |                                                                                                                                                      |
|---------------------------------------------------|------------------------------------------------------------------------------------------------------------------------------------------------------|
| Identification code                               | (±)- <b>3ka</b>                                                                                                                                      |
| Empirical formula                                 | 'C30 H32 N2 O3 S'                                                                                                                                    |
| Formula weight                                    | 501.64                                                                                                                                               |
| Crystal habit, colour                             | Block/Colourless                                                                                                                                     |
| Temperature, <i>T</i> /K                          | 293 K                                                                                                                                                |
| Wavelength, $\lambda/\text{\AA}$                  | 0.71073                                                                                                                                              |
| Crystal system                                    | 'monoclinic'                                                                                                                                         |
| Space group                                       | 'P 21/c'                                                                                                                                             |
| Unit cell dimensions                              | a = 8.1277(10) $\text{\AA}$<br>b = 14.3667(13) $\text{\AA}$<br>c = 22.6619(18) $\text{\AA}$<br>$\alpha = 90$<br>$\beta = 96.681(9)$<br>$\gamma = 90$ |
| Volume, $V/\text{\AA}^3$                          | 2628.2(5)                                                                                                                                            |
| <i>Z</i>                                          | 4                                                                                                                                                    |
| Calculated density, $\text{Mg}\cdot\text{m}^{-3}$ | 1.268                                                                                                                                                |
| Absorption coefficient, $\mu/\text{mm}^{-1}$      | 0.157                                                                                                                                                |
| $F(000)$                                          | 1068                                                                                                                                                 |
| $\theta$ range for data collection                | 2.29 to 28.73°                                                                                                                                       |
| Limiting indices                                  | $-10 \leq h \leq 9, -19 \leq k \leq 9, -28 \leq l \leq 29$                                                                                           |
| Reflection collected / unique                     | 5933/4034                                                                                                                                            |
| Refinement method                                 | 'SHELXL-2019/1 (Sheldrick, 2019)'                                                                                                                    |
| Data / restraints / parameters                    | 5933/0/ 330                                                                                                                                          |
| Goodness-of-fit on $F^2$                          | 1.041                                                                                                                                                |
| Final <i>R</i> indices [ $I > 2\sigma(I)$ ]       | R1 = 0.0571, wR2 = 0.1339                                                                                                                            |
| <i>R</i> indices (all data)                       | R1 = 0.0874, wR2 = 0.1617                                                                                                                            |

## Crystal Data and Structure Refinement for ( $\pm$ )-4pa

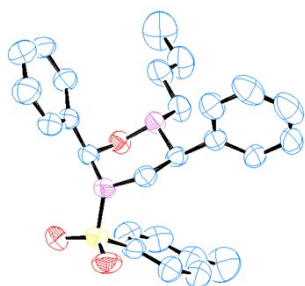

**Figure S2.** ORTEP diagram of 2-butyl-3,6-diphenyl-5-tosyl-1,2,5-oxadiazinane ( $\pm$ )-4pa (CCDC 2426708) with 50% ellipsoid. H-omitted for clarity.

|                                                 |                                                                                                                   |
|-------------------------------------------------|-------------------------------------------------------------------------------------------------------------------|
| Identification code                             | ( $\pm$ )-4pa                                                                                                     |
| Empirical formula                               | 'C <sub>26</sub> H <sub>30</sub> N <sub>2</sub> O <sub>3</sub> S'                                                 |
| Formula weight                                  | 450.58                                                                                                            |
| Crystal habit, colour                           | Block/Colourless                                                                                                  |
| Temperature, <i>T</i> /K                        | 296 K                                                                                                             |
| Wavelength, $\lambda$ /Å                        | 0.71073                                                                                                           |
| Crystal system                                  | 'monoclinic'                                                                                                      |
| Space group                                     | 'I 1 a 1'                                                                                                         |
| Unit cell dimensions                            | a = 8.1212(9) Å<br>b = 29.253(3) Å<br>c = 11.1577(11) Å<br>$\alpha$ = 90<br>$\beta$ = 110.143(7)<br>$\gamma$ = 90 |
| Volume, <i>V</i> /Å <sup>3</sup>                | 2488.6(5)                                                                                                         |
| <i>Z</i>                                        | 4                                                                                                                 |
| Calculated density, Mg·m <sup>-3</sup>          | 1.203                                                                                                             |
| Absorption coefficient, $\mu$ /mm <sup>-1</sup> | 0.159                                                                                                             |
| <i>F</i> (000)                                  | 960                                                                                                               |
| $\theta$ range for data collection              | 1.39 to 25.05°                                                                                                    |
| Limiting indices                                | -9 ≤ <i>h</i> ≤ 9, -34 ≤ <i>k</i> ≤ 34, -13 ≤ <i>l</i> ≤ 13                                                       |
| Reflection collected / unique                   | 4399/3132                                                                                                         |
| Refinement method                               | 'SHELXL 2018/3 (Sheldrick, 2015)'                                                                                 |

|                                        |                                |
|----------------------------------------|--------------------------------|
| Data / restraints / parameters         | 4399/2/ 292                    |
| Goodness-of-fit on $F^2$               | 1.013                          |
| Final $R$ indices [ $I > 2\sigma(I)$ ] | $R1 = 0.0350$ , $wR2 = 0.0833$ |
| $R$ indices (all data)                 | $R1 = 0.0588$ , $wR2 = 0.0985$ |

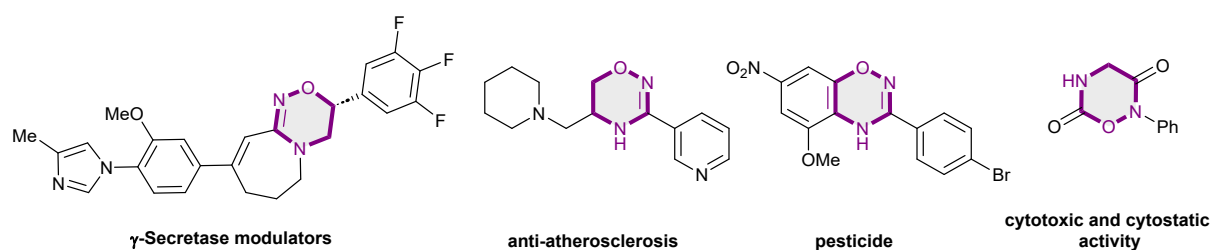

**Figure S3.** Examples of biologically important [1,2,4]/[1,2,5]-oxadiazine scaffolds.

**Table S1. Optimization of the Reaction Conditions<sup>a</sup>**

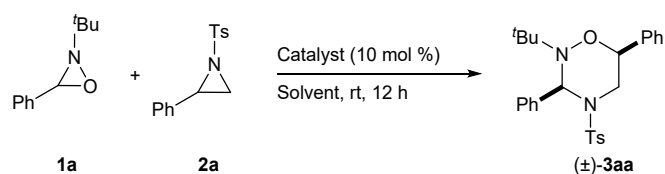

| Entry | Catalyst (10 mol %)                                   | Solvent                               | Yield [(±)- <b>3aa</b> , (%)] <sup>b</sup> |
|-------|-------------------------------------------------------|---------------------------------------|--------------------------------------------|
| 1     | Ni(OTf) <sub>2</sub>                                  | (CH <sub>2</sub> Cl) <sub>2</sub>     | 45                                         |
| 2     | Cu(OTf) <sub>2</sub>                                  | (CH <sub>2</sub> Cl) <sub>2</sub>     | 68                                         |
| 3     | AgOTf                                                 | (CH <sub>2</sub> Cl) <sub>2</sub>     | 70                                         |
| 4     | Zn(OTf) <sub>2</sub>                                  | (CH <sub>2</sub> Cl) <sub>2</sub>     | 54                                         |
| 5     | Yb(OTf) <sub>3</sub>                                  | (CH <sub>2</sub> Cl) <sub>2</sub>     | 60                                         |
| 6     | Ni(ClO <sub>4</sub> ) <sub>2</sub> •6H <sub>2</sub> O | (CH <sub>2</sub> Cl) <sub>2</sub>     | 35                                         |
| 7     | <b>AgNTf<sub>2</sub></b>                              | <b>(CH<sub>2</sub>Cl)<sub>2</sub></b> | <b>82</b>                                  |
| 8     | AgBF <sub>4</sub>                                     | (CH <sub>2</sub> Cl) <sub>2</sub>     | 55                                         |
| 9     | AgOAc                                                 | (CH <sub>2</sub> Cl) <sub>2</sub>     | n.r.                                       |
| 10    | AgTFA                                                 | (CH <sub>2</sub> Cl) <sub>2</sub>     | 40                                         |
| 11    | AgNTf <sub>2</sub>                                    | CH <sub>2</sub> Cl <sub>2</sub>       | 77                                         |
| 12    | AgNTf <sub>2</sub>                                    | toluene                               | 35                                         |
| 13    | AgNTf <sub>2</sub>                                    | DMSO                                  | n.r.                                       |
| 14    | AgNTf <sub>2</sub>                                    | DMF                                   | n.r.                                       |

|                 |                    |                                   |       |
|-----------------|--------------------|-----------------------------------|-------|
| 15              | AgNTf <sub>2</sub> | CH <sub>3</sub> CN                | 20    |
| 16              | AgNTf <sub>2</sub> | THF                               | trace |
| 17 <sup>c</sup> | AgNTf <sub>2</sub> | (CH <sub>2</sub> Cl) <sub>2</sub> | 62    |
| 18              | -                  | (CH <sub>2</sub> Cl) <sub>2</sub> | n.r.  |

<sup>a</sup>Reaction conditions: **1a** (0.2 mmol), **2a** (0.2 mmol), catalyst (10 mol %), solvent (2 mL), rt, 12 h. <sup>b</sup>Yield of the isolated product. <sup>c</sup>At 80 °C. n.r. = no reaction.

### Scheme S1. General Procedure for the Synthesis of Oxaziridines **1**<sup>1a,1c</sup>

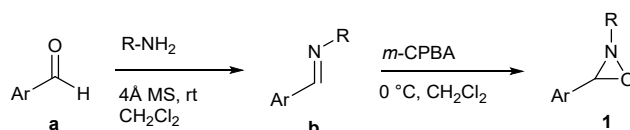

**Step 1 (Scheme S1):** To a stirred solution of aldehyde **a** (3 mmol, 1 equiv) and 4Å molecular sieves (3g) in CH<sub>2</sub>Cl<sub>2</sub> (9 mL), appropriate amine (12 mmol, 4 equiv) was added dropwise and the resulting mixture was allowed to stir at room temperature for 6 h. After completion (monitored by TLC), the molecular sieves were removed by filtration and the solvent was evaporated to give imine **b** which was used for the next step without further purification.

**Step 2 (Scheme S1):** To a stirred solution of imine **b** (2 mmol, 1 equiv) in CH<sub>2</sub>Cl<sub>2</sub> (4 mL), a solution of *m*-CPBA (4 mmol, 2 equiv) in CH<sub>2</sub>Cl<sub>2</sub> (4 mL) was added dropwise at 0 °C. The resulting mixture was stirred at same temperature for 24 h. After completion (monitored by TLC), the resulting mixture was treated with saturated Na<sub>2</sub>SO<sub>3</sub> (2 x 5 mL) and Na<sub>2</sub>CO<sub>3</sub> (2 x 5 mL). The organic layer was separated and the aqueous layer was extracted with CH<sub>2</sub>Cl<sub>2</sub> (2 x 10 mL). Drying (Na<sub>2</sub>SO<sub>4</sub>) and evaporation of the solvent gave a residue that was purified on silica gel column chromatography using hexane and ethyl acetate as eluent to give **1**.

Oxaziridines **1m**<sup>1b</sup>, **1o**<sup>1b</sup> and **1s**<sup>1b</sup> prepared according to the reported procedures.

### Scheme S2. General Procedure for the Synthesis of Aziridines **2a-h**, **2n** and **2o**<sup>2</sup>

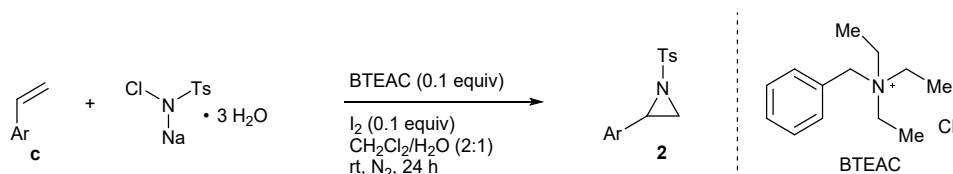

To a stirred solution of the alkene **c** (2 mmol, 1 equiv) and benzyltriethylammonium chloride (BTEAC) (0.2 mmol, 0.1 equiv) in CH<sub>2</sub>Cl<sub>2</sub>/H<sub>2</sub>O (2:1, 15 mL), were added chloramine T

trihydrate (2.4 mmol, 1.2 equiv) and iodine (0.2 mmol, 0.1 equiv) at room temperature under N<sub>2</sub> atmosphere and the resulting mixture was allowed to stir for 24 h. After completion (monitored by TLC), the reaction mixture was washed with saturated Na<sub>2</sub>S<sub>2</sub>O<sub>3</sub> (2 x 10 mL) and extracted with CH<sub>2</sub>Cl<sub>2</sub> (3 x 10 mL). Drying (Na<sub>2</sub>SO<sub>4</sub>) and evaporation of the solvent gave a residue that was purified on silica gel column chromatography using hexane and ethyl acetate as eluent to give **2a-h**, **2n** and **2o**.

### Scheme S3. General Procedure for the Synthesis of Aziridines **2i-m**, **2p** and **2t**<sup>2b</sup>

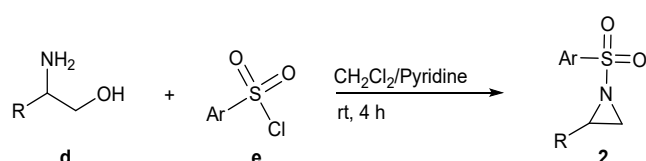

To a stirred solution of amino alcohol **d** (3 mmol, 1 equiv) in CH<sub>2</sub>Cl<sub>2</sub>/pyridine (2:1, 3.15 mL) was added the appropriate sulfonyl chloride **e** (9 mmol, 3 equiv) in one portion at 0 °C. The resultant mixture was warmed to room temperature and allowed to stir for 4 h. After completion (monitored by TLC), the reaction mixture was diluted with CH<sub>2</sub>Cl<sub>2</sub> (30 mL), and washed with aqueous 2 N HCl (3 x 10 mL). The combined aqueous layers were extracted with CH<sub>2</sub>Cl<sub>2</sub> (1 x 20 mL). The organic layer was then washed with aqueous 2 N KOH (3 x 10 mL). The combined basic layers were then extracted with CH<sub>2</sub>Cl<sub>2</sub> (1 x 20 mL). Drying (Na<sub>2</sub>SO<sub>4</sub>) and evaporation of the solvent gave a residue that was purified on silica gel column chromatography using hexane and ethyl acetate as eluent to give **2i-m**, **2p** and **2t**.

Aziridines **2q**<sup>2a</sup>, **2r**<sup>2e</sup> and **2s**<sup>2e</sup> were prepared according to the reported procedure.

### Scheme S4. Synthesis of Aziridines (*R*)/(*S*)-**2a**<sup>2e</sup>

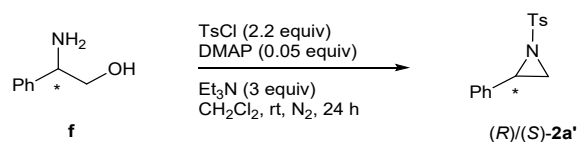

To a stirred solution of (*R*)/(*S*)-2-phenylglycinol **f** (1 mmol, 1 equiv, 137 mg), TsCl (2.2 mmol, 2.2 equiv, 420 mg) and DMAP (0.05 mmol, 0.05 equiv, 6 mg) in CH<sub>2</sub>Cl<sub>2</sub> (20 mL) at 0 °C was added a solution of Et<sub>3</sub>N (3.0 mmol, 3 equiv, 303 mg) in CH<sub>2</sub>Cl<sub>2</sub> (5 mL). The resultant mixture was warmed to room temperature and allowed to stir for 24 h under N<sub>2</sub> atmosphere. After completion (monitored by TLC), the mixture was treated with a saturated NH<sub>4</sub>Cl (20 mL) and

extracted with CH<sub>2</sub>Cl<sub>2</sub> (3 x 10 mL). Drying (Na<sub>2</sub>SO<sub>4</sub>) and evaporation of the solvent gave a residue that was purified on a silica gel column chromatography using hexane and ethyl acetate (9:1) as eluent to afford (*R*)/(*S*)**2a'**.

### Characterization Data of Starting Materials

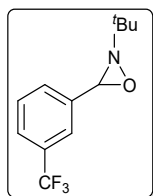

**2-(*tert*-Butyl)-3-(3-(trifluoromethyl)phenyl)-1,2-oxaziridine 1d.** Analytical TLC on silica gel, 1:49 ethyl acetate/hexane  $R_f = 0.50$ ; colorless liquid; yield 61% (448 mg); <sup>1</sup>H NMR (400 MHz, CDCl<sub>3</sub>)  $\delta$  7.70 (s, 1H), 7.65-7.61 (m, 2H), 7.51-7.47 (m, 1H), 4.73 (s, 1H), 1.18 (s, 9H); <sup>13</sup>C NMR (100 MHz, CDCl<sub>3</sub>)  $\delta$  137.0, 131.3 (q,  $J = 32.4$  Hz), 131.1, 129.1, 126.7 (q,  $J = 3.8$  Hz), 125.4 (q,  $J = 270.6$  Hz), 124.7 (q,  $J = 3.8$  Hz), 73.0, 58.8, 25.3; <sup>19</sup>F NMR (377 MHz, CDCl<sub>3</sub>)  $\delta$  -62.675; FT-IR (neat) 2928, 1329, 1166, 1127, 1070, 803, 699 cm<sup>-1</sup>; HRMS (ESI)  $m/z$  [M+H]<sup>+</sup> calcd for C<sub>12</sub>H<sub>15</sub>F<sub>3</sub>NO: 246.1100, found: 246.1102.

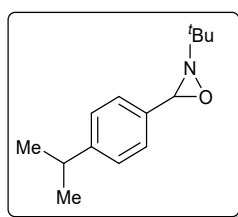

**2-(*tert*-Butyl)-3-(4-isopropylphenyl)-1,2-oxaziridine 1j.** Analytical TLC on silica gel, 1:49 ethyl acetate/hexane  $R_f = 0.48$ ; colorless liquid; yield 65% (427 mg); <sup>1</sup>H NMR (400 MHz, CDCl<sub>3</sub>)  $\delta$  7.38 (d,  $J = 8.0$  Hz, 2H), 7.25 (d,  $J = 8.0$  Hz, 2H), 4.66 (s, 1H), 2.95-2.88 (m, 1H), 1.35 (d,  $J = 7.2$  Hz, 6H), 1.17 (s, 9H); <sup>13</sup>C NMR (125 MHz, CDCl<sub>3</sub>)  $\delta$  150.8, 133.1, 127.6, 126.6, 73.7, 58.4, 34.1, 25.4, 24.0; FT-IR (neat) 2961, 1608, 1459, 1362, 1260, 824, 767 cm<sup>-1</sup>; HRMS (ESI)  $m/z$  [M+H]<sup>+</sup> calcd for C<sub>14</sub>H<sub>22</sub>NO: 220.1696, found: 220.1697.

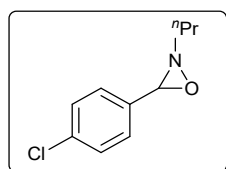

**3-(4-Chlorophenyl)-2-propyl-1,2-oxaziridine 1t.** Analytical TLC on silica gel, 1:49 ethyl acetate/hexane  $R_f = 0.55$ ; colorless liquid; yield 70% (413 mg); <sup>1</sup>H NMR (500 MHz, CDCl<sub>3</sub>)  $\delta$  7.356-7.350 (m, 4H), 4.46 (s, 1H), 2.96-2.91 (m, 1H), 2.74-2.69 (m, 1H), 1.78-1.71 (m, 2H), 1.02 (t,  $J = 7.5$  Hz, 3H); <sup>13</sup>C NMR (125 MHz, CDCl<sub>3</sub>)  $\delta$  136.1, 133.6, 129.0, 128.8, 79.8, 64.0, 21.4, 12.0; FT-IR (neat) 2924, 1675, 1609, 1512, 1376, 1184, 814, 654 cm<sup>-1</sup>; HRMS (ESI)  $m/z$  [M+H]<sup>+</sup> calcd for C<sub>10</sub>H<sub>13</sub>ClNO: 198.0680, found: 198.0679.

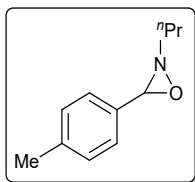

**2-Propyl-3-(*p*-tolyl)-1,2-oxaziridine 1u.** Analytical TLC on silica gel, 1:49 ethyl acetate/hexane  $R_f = 0.60$ ; colorless liquid; yield 72% (382 mg);  $^1\text{H NMR}$  (500 MHz,  $\text{CDCl}_3$ )  $\delta$  7.32 (d,  $J = 8.0$  Hz, 2H), 7.19 (d,  $J = 7.5$  Hz, 2H), 4.45 (s, 1H), 2.94-2.89 (m, 1H), 2.76-2.71 (m, 1H), 2.36 (s, 3H), 1.79-1.71 (m, 2H), 1.02 (t,  $J = 7.5$  Hz, 3H);  $^{13}\text{C NMR}$  (125 MHz,  $\text{CDCl}_3$ )  $\delta$  140.1, 132.0, 129.3, 127.6, 80.6, 64.0, 21.4, 21.3, 12.0; FT-IR (neat) 2964, 1679, 1490, 1378, 1091, 1013, 825, 522  $\text{cm}^{-1}$ ; HRMS (ESI)  $m/z$   $[\text{M}+\text{H}]^+$  calcd for  $\text{C}_{11}\text{H}_{16}\text{NO}$ : 178.1226, found: 178.1225.

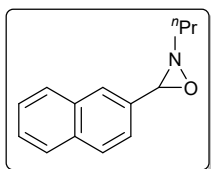

**3-(Naphthalen-2-yl)-2-propyl-1,2-oxaziridine 1v.** Analytical TLC on silica gel, 1:49 ethyl acetate/hexane  $R_f = 0.48$ ; colorless liquid; yield 55% (351 mg);  $^1\text{H NMR}$  (500 MHz,  $\text{CDCl}_3$ )  $\delta$  7.96 (s, 1H), 7.87-7.83 (m, 3H), 7.53-7.49 (m, 2H), 7.46 (d,  $J = 8.5$  Hz, 1H), 4.66 (s, 1H), 3.02-2.97 (m, 1H), 2.83-2.77 (m, 1H), 1.83-1.76 (m, 2H), 1.05 (t,  $J = 7.5$  Hz, 3H);  $^{13}\text{C NMR}$  (125 MHz,  $\text{CDCl}_3$ )  $\delta$  134.4, 133.0, 132.5, 128.6, 128.2, 128.2, 127.9, 126.9, 126.5, 124.0, 80.8, 64.1, 21.4, 12.0; FT-IR (neat) 2926, 1682, 1624, 1373, 1189, 819, 748  $\text{cm}^{-1}$ ; HRMS (ESI)  $m/z$   $[\text{M}+\text{H}]^+$  calcd for  $\text{C}_{14}\text{H}_{16}\text{NO}$ : 214.1226, found: 214.1224.

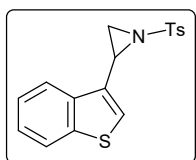

**2-(Benzo[b]thiophen-3-yl)-1-tosylaziridine 2o.** Analytical TLC on silica gel, 1:9 ethyl acetate/hexane  $R_f = 0.43$ ; sticky liquid; yield 39% (256 mg);  $^1\text{H NMR}$  (400 MHz,  $\text{CDCl}_3$ )  $\delta$  7.91 (d,  $J = 8$  Hz, 2H), 7.84-7.81 (m, 4H), 7.37-7.33 (m, 4H), 7.25 (d,  $J = 7.6$  Hz), 4.03-4.00 (m, 1H), 3.06 (d,  $J = 7.2$  Hz, 1H), 2.55 (d,  $J = 4.8$  Hz, 1H), 2.44 (s, 3H);  $^{13}\text{C NMR}$  (125 MHz,  $\text{CDCl}_3$ )  $\delta$  144.9, 140.6, 137.8, 134.9, 130.5, 129.9, 128.2, 124.9, 124.6, 124.5, 122.9, 121.8, 36.6, 34.7, 21.8; FT-IR (neat) 2923, 1596, 1430, 1323, 1160, 1091, 901, 718  $\text{cm}^{-1}$ ; HRMS (ESI)  $m/z$   $[\text{M}+\text{H}]^+$  calcd for  $\text{C}_{17}\text{H}_{16}\text{NO}_2\text{S}_2$ : 330.0617, found: 330.0605.

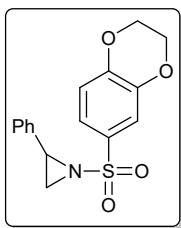

**1-((2,3-Dihydrobenzo[b][1,4]dioxin-6-yl)sulfonyl)-2-phenylaziridine 2t.**

Analytical TLC on silica gel, 1:9 ethyl acetate/hexane  $R_f = 0.52$ ; colorless solid; mp 154-155 °C; yield 35% (332 mg);  $^1\text{H NMR}$  (400 MHz,  $\text{CDCl}_3$ )  $\delta$  7.50 (d,  $J = 2.4$  Hz, 1H), 7.47-7.44 (m, 1H), 7.30-7.25 (m, 3H), 7.23-7.21 (m, 2H), 6.97 (d,  $J = 8.4$  Hz, 1H), 4.30 (m, 4H), 3.74 (dd,  $J = 7.2, 4.4$  Hz, 1H), 2.94 (d,  $J = 7.2$  Hz, 1H), 2.37 (d,  $J = 4.4$  Hz, 1H);  $^{13}\text{C NMR}$  (125 MHz,  $\text{CDCl}_3$ )  $\delta$  148.3, 143.6, 135.2, 130.1, 128.6, 128.3, 126.6, 121.7, 117.9, 117.7, 64.6, 64.2, 41.0, 36.1; FT-IR (KBr) 2956, 1594, 1498, 1458, 1326, 1190, 1015, 775  $\text{cm}^{-1}$ ; HRMS (ESI)  $m/z$   $[\text{M}+\text{H}]^+$  calcd for  $\text{C}_{16}\text{H}_{16}\text{NO}_4\text{S}$ : 318.0795, found: 318.0779.

**General Procedure for the Synthesis of [1,2,4]/[1,2,5]-Oxadiazines.** Oxaziridine **1** (0.2 mmol, 1.0 equiv), aziridine **2** (0.2 mmol, 1.0 equiv) and  $\text{AgNTf}_2$  (7.7 mg, 0.02 mmol, 0.1 equiv) were stirred in  $(\text{CH}_2\text{Cl}_2)$  (2.0 mL, 0.1 M) at room temperature for 12 h. After completion (monitored by TLC), the reaction mixture was diluted with  $\text{CH}_2\text{Cl}_2$  (5 mL) and passed through a short pad of celite using  $\text{CH}_2\text{Cl}_2$  (10 mL). Evaporation of the solvent gave a residue that was purified on silica gel column chromatography using ethyl acetate and hexane as eluent to afford **3/4**.

**General Procedure for the Stereospecific Synthesis of [1,2,4]/[1,2,5]-Oxadiazines.** Oxaziridine **1** (0.2 mmol, 1.0 equiv), (*R*)/(*S*)-**2a'** (0.2 mmol, 1.0 equiv) and  $\text{AgNTf}_2$  (7.7 mg, 0.02 mmol, 0.1 equiv) were stirred in  $(\text{CH}_2\text{Cl}_2)$  (2.0 mL, 0.1 M) at room temperature for 12 h. The purification was performed as above in general procedure to afford **3'/4'**. Then HPLC analysis was carried out using Daicel CHIRALPAK AD-H and YMC Chiral ART Cellulose-SC columns utilizing *iso*-propanol and hexane as eluent.

**Characterization Data of Products**

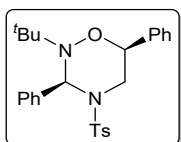

**(3*S*,6*S*)-2-(*tert*-Butyl)-3,6-diphenyl-4-tosyl-1,2,4-oxadiazinane 3aa'.**

Analytical TLC on silica gel, 1:19 ethyl acetate/hexane  $R_f = 0.45$ ; colorless solid; mp 136-137 °C; yield 80% (72 mg);  $^1\text{H NMR}$  (500 MHz,  $\text{CDCl}_3$ )  $\delta$  7.74-7.72 (m, 2H), 7.60 (d,  $J = 8.5$  Hz, 2H), 7.40-7.37 (m, 2H), 7.35-7.33 (m, 1H), 7.31-7.28 (m, 5H), 7.19 (d,  $J = 8.5$  Hz, 2H), 6.06

(s, 1H), 4.74 (dd,  $J = 11.0, 3.0$  Hz, 1H), 3.83 (dd,  $J = 14.0, 3.5$  Hz, 1H), 3.42-3.37 (m, 1H), 2.38 (s, 3H), 0.98 (s, 9H);  $^{13}\text{C}\{^1\text{H}\}$  NMR (125 MHz,  $\text{CDCl}_3$ )  $\delta$  143.3, 139.0, 138.3, 137.5, 129.7, 129.4, 128.7, 128.45, 128.40, 128.3, 127.7, 125.8, 78.6, 72.3, 58.3, 45.5, 26.8, 21.6; FT-IR (KBr) 2970, 2922, 2856, 1345, 1160, 959, 659  $\text{cm}^{-1}$ ; HRMS (ESI)  $m/z$   $[\text{M}+\text{H}]^+$  calcd for  $\text{C}_{26}\text{H}_{31}\text{N}_2\text{O}_3\text{S}$ : 451.2050, found: 451.2055;  $[\alpha]_{\text{D}}^{20.9} = +60$  ( $c = 0.02$ ,  $\text{CHCl}_3$ ); HPLC: 94% *ee* [CHIRALPAK AD-H, hexane/*i*PrOH = 98:02, flow rate: 1 mL /min,  $\lambda = 254$  nm,  $t_{\text{R}} = 16.27$  min (major), 20.51 min (minor)]: **(3*R*,6*R*)-2-(*tert*-Butyl)-3,6-diphenyl-4-tosyl-1,2,4-oxadiazinane 3aa''**. Colorless solid;  $[\alpha]_{\text{D}}^{21.0} = -10$  ( $c = 0.01$ ,  $\text{CHCl}_3$ ); HPLC: 92% *ee* [CHIRALPAK AD-H, hexane/*i*PrOH = 98:02, flow rate: 1 mL /min,  $\lambda = 254$  nm,  $t_{\text{R}} = 16.46$  min (minor), 20.95 min (major)].

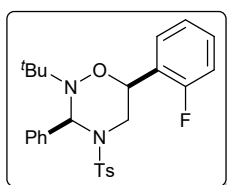

**2-(*tert*-Butyl)-6-(2-fluorophenyl)-3-phenyl-4-tosyl-1,2,4-oxadiazinane**

**(±)-3ab**. Analytical TLC on silica gel, 1:19 ethyl acetate/hexane  $R_f = 0.50$ ; colorless solid; mp 224-225 °C; yield 65% (61 mg);  $^1\text{H}$  NMR (500 MHz,  $\text{CDCl}_3$ )  $\delta$  7.78-7.76 (m, 2H), 7.71 (d,  $J = 8.5$  Hz, 2H), 7.45 (t,  $J = 7.0$  Hz, 1H), 7.33-7.29 (m, 4H), 7.26-7.24 (m, 2H), 7.20 (t,  $J = 7.5$  Hz, 1H), 7.07-7.03 (m, 1H), 6.06 (s, 1H), 4.87 (dd,  $J = 11.0, 2.5$  Hz, 1H), 3.94 (dd,  $J = 14.5, 3.0$  Hz, 1H), 3.44-3.39 (m, 1H), 2.40 (s, 3H), 0.95 (s, 9H);  $^{13}\text{C}\{^1\text{H}\}$  NMR (125 MHz,  $\text{CDCl}_3$ )  $\delta$  160.6 (d,  $J_{\text{C-F}} = 245.7$  Hz), 143.4, 139.0, 137.6, 129.8 (d,  $J_{\text{C-F}} = 8.1$  Hz), 129.6, 129.4, 128.4, 128.3, 127.8, 127.0 (d,  $J_{\text{C-F}} = 4.2$  Hz), 125.6 (d,  $J_{\text{C-F}} = 14.0$  Hz), 124.6 (d,  $J_{\text{C-F}} = 3.5$  Hz), 115.7 (d,  $J_{\text{C-F}} = 21.2$  Hz), 73.4, 72.5, 58.2, 44.6, 26.7, 21.6;  $^{19}\text{F}$  NMR (471 MHz,  $\text{CDCl}_3$ )  $\delta$  -117.431; FT-IR (KBr) 2922, 1493, 1455, 1345, 1162, 959, 705, 661  $\text{cm}^{-1}$ ; HRMS (ESI)  $m/z$   $[\text{M}+\text{H}]^+$  calcd for  $\text{C}_{26}\text{H}_{30}\text{FN}_2\text{O}_3\text{S}$ : 469.1956, found: 469.1958.

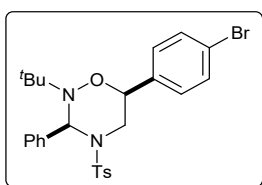

**6-(4-Bromophenyl)-2-(*tert*-butyl)-3-phenyl-4-tosyl-1,2,4-**

**oxadiazinane (±)-3ac**. Analytical TLC on silica gel, 1:9 ethyl acetate/hexane  $R_f = 0.56$ ; colorless solid; mp 168-169 °C; yield 70% (74 mg);  $^1\text{H}$  NMR (500 MHz,  $\text{CDCl}_3$ )  $\delta$  7.69 (d,  $J = 7.5$  Hz, 2H), 7.58 (d,  $J = 8.0$  Hz, 2H), 7.52 (d,  $J = 8.0$  Hz, 2H), 7.29-7.27 (m, 3H), 7.18-7.17 (m, 4H), 6.04 (s, 1H), 4.70 (dd,  $J = 11.5, 3.0$  Hz, 1H), 3.81 (dd,  $J = 14.0, 3.0$  Hz, 1H), 3.35-3.30 (m, 1H), 2.38 (s, 3H), 0.97 (s, 9H);  $^{13}\text{C}\{^1\text{H}\}$  NMR (125 MHz,  $\text{CDCl}_3$ )  $\delta$  143.4, 138.8,

137.3, 137.1, 131.9, 129.5, 129.4, 128.5, 128.4, 127.6, 127.5, 122.3, 78.0, 72.2, 58.4, 45.3, 26.7, 21.6; FT-IR (KBr) 2926, 1488, 1343, 1162, 1010, 959, 703  $\text{cm}^{-1}$ ; HRMS (ESI)  $m/z$   $[M+H]^+$  calcd for  $\text{C}_{26}\text{H}_{30}\text{BrN}_2\text{O}_3\text{S}$ : 529.1155, found: 529.1158.

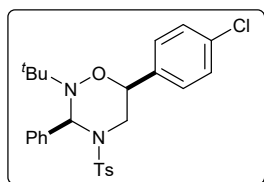

**2-(*tert*-Butyl)-6-(4-chlorophenyl)-3-phenyl-4-tosyl-1,2,4-**

**oxadiazinane (±)-3ad.** Analytical TLC on silica gel, 1:9 ethyl acetate/hexane  $R_f = 0.54$ ; colorless solid; mp 185-186  $^{\circ}\text{C}$ ; yield 69% (67 mg);  $^1\text{H}$  NMR (500 MHz,  $\text{CDCl}_3$ )  $\delta$  7.69-7.68 (m, 2H), 7.59 (d,  $J = 8.5$  Hz, 2H), 7.37 (d,  $J = 8.5$  Hz, 2H), 7.30-7.28 (m, 3H), 7.24-7.23 (m, 2H), 7.19 (d,  $J = 8.0$  Hz, 2H), 6.05 (s, 1H), 4.72 (dd,  $J = 11.5, 3.0$  Hz, 1H), 3.81 (dd,  $J = 14.0, 3.0$  Hz, 1H), 3.36-3.31 (m, 1H), 2.38 (s, 3H), 0.98 (s, 9H);  $^{13}\text{C}\{^1\text{H}\}$  NMR (125 MHz,  $\text{CDCl}_3$ )  $\delta$  143.4, 138.9, 137.3, 136.6, 134.3, 129.6, 129.4, 129.0, 128.5, 128.4, 127.6, 127.2, 78.0, 72.2, 58.4, 45.4, 26.7, 21.6; FT-IR (KBr) 2924, 1490, 1340, 1162, 959, 814, 656  $\text{cm}^{-1}$ ; HRMS (ESI)  $m/z$   $[M+H]^+$  calcd for  $\text{C}_{26}\text{H}_{30}\text{ClN}_2\text{O}_3\text{S}$ : 485.1660, found: 485.1666.

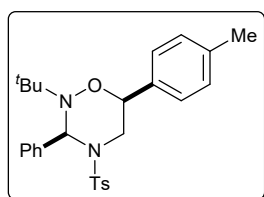

**2-(*tert*-Butyl)-3-phenyl-6-(*p*-tolyl)-4-tosyl-1,2,4-oxadiazinane (±)-3ae.**

Analytical TLC on silica gel, 1:9 ethyl acetate/hexane  $R_f = 0.58$ ; colorless solid; mp 159-160  $^{\circ}\text{C}$ ; yield 78% (73 mg);  $^1\text{H}$  NMR (500 MHz,  $\text{CDCl}_3$ )  $\delta$  7.79-7.78 (m, 2H), 7.66 (d,  $J = 8.0$  Hz, 2H), 7.35-7.32 (m, 4H), 7.25-7.23 (m, 5H), 6.10 (s, 1H), 4.76 (dd,  $J = 11.5, 3.0$  Hz, 1H), 3.87 (dd,  $J = 14.0, 2.5$  Hz, 1H), 3.48-3.43 (m, 1H), 2.44 (s, 3H), 2.42 (s, 3H), 1.03 (s, 9H);  $^{13}\text{C}\{^1\text{H}\}$  NMR (125 MHz,  $\text{CDCl}_3$ )  $\delta$  143.2, 139.1, 138.2, 137.5, 135.2, 129.7, 129.4, 129.3, 128.4, 128.2, 127.7, 125.9, 78.5, 72.3, 58.3, 45.5, 26.7, 21.6, 21.3; FT-IR (KBr) 2927, 1340, 1162, 959, 702, 659  $\text{cm}^{-1}$ ; HRMS (ESI)  $m/z$   $[M+H]^+$  calcd for  $\text{C}_{27}\text{H}_{33}\text{N}_2\text{O}_3\text{S}$ : 465.2206, found: 465.2206.

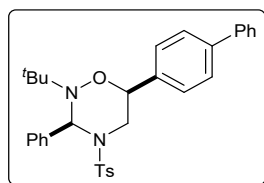

**6-([1,1'-Biphenyl]-4-yl)-2-(*tert*-butyl)-3-phenyl-4-tosyl-1,2,4-**

**oxadiazinane (±)-3af.** Analytical TLC on silica gel, 1:9 ethyl acetate/hexane  $R_f = 0.52$ ; colorless solid; mp 180-181  $^{\circ}\text{C}$ ; yield 76% (80 mg);  $^1\text{H}$  NMR (500 MHz,  $\text{CDCl}_3$ )  $\delta$  7.75-7.74

(m, 2H), 7.62-7.57 (m, 6H), 7.46-7.43 (m, 2H), 7.39-7.36 (m, 3H), 7.30-7.29 (m, 3H), 7.20 (d,  $J = 8.0$  Hz, 2H), 6.07 (s, 1H), 4.79 (dd,  $J = 11.0, 3.0$  Hz, 1H), 3.88 (dd,  $J = 14.0, 3.0$  Hz, 1H), 3.46-3.41 (m, 1H), 2.39 (s, 3H), 1.00 (s, 9H);  $^{13}\text{C}\{^1\text{H}\}$  NMR (125 MHz,  $\text{CDCl}_3$ )  $\delta$  143.3, 141.4, 140.7, 139.0, 137.4, 137.1, 129.7, 129.4, 129.0, 128.4, 128.3, 127.7, 127.6, 127.5, 127.2, 126.3, 78.4, 72.3, 58.4, 45.5, 26.8, 21.6; FT-IR (KBr) 2924, 1488, 1340, 1162, 959, 761, 664  $\text{cm}^{-1}$ ; HRMS (ESI)  $m/z$   $[\text{M}+\text{H}]^+$  calcd for  $\text{C}_{32}\text{H}_{35}\text{N}_2\text{O}_3\text{S}$ : 527.2363, found: 527.2366.

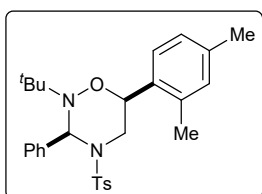

**2-(*tert*-Butyl)-6-(2,4-dimethylphenyl)-3-phenyl-4-tosyl-1,2,4-**

**oxadiazinane (±)-3ag.** Analytical TLC on silica gel, 1:9 ethyl acetate/hexane  $R_f = 0.50$ ; colorless solid; mp 169-170  $^\circ\text{C}$ ; yield 75% (72 mg);  $^1\text{H}$  NMR (500 MHz,  $\text{CDCl}_3$ )  $\delta$  7.80-7.78 (m, 2H), 7.65 (d,  $J = 8.0$  Hz, 2H), 7.34-7.30 (m, 4H), 7.21 (d,  $J = 8.0$  Hz, 2H), 7.08 (d,  $J = 8.0$  Hz, 1H), 6.98 (s, 1H), 6.10 (s, 1H), 4.85 (dd,  $J = 11.0, 3.0$  Hz, 1H), 3.70 (dd,  $J = 14.5, 3.0$  Hz, 1H), 3.44-3.39 (m, 1H), 2.39 (s, 3H), 2.31 (s, 3H), 2.14 (s, 3H), 0.97 (s, 9H);  $^{13}\text{C}\{^1\text{H}\}$  NMR (125 MHz,  $\text{CDCl}_3$ )  $\delta$  143.3, 139.2, 138.1, 137.7, 135.4, 133.3, 131.5, 129.7, 129.3, 128.4, 128.2, 127.9, 127.1, 125.4, 75.9, 72.4, 58.2, 44.5, 26.8, 21.6, 21.1, 19.1; FT-IR (KBr) 2925, 1452, 1344, 1161, 959, 703, 659  $\text{cm}^{-1}$ ; HRMS (ESI)  $m/z$   $[\text{M}+\text{H}]^+$  calcd for  $\text{C}_{28}\text{H}_{35}\text{N}_2\text{O}_3\text{S}$ : 479.2363, found: 479.2367.

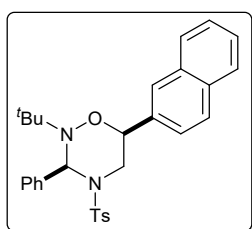

**2-(*tert*-Butyl)-6-(naphthalen-2-yl)-3-phenyl-4-tosyl-1,2,4-**

**oxadiazinane (±)-3ah.** Analytical TLC on silica gel, 1:9 ethyl acetate/hexane  $R_f = 0.48$ ; colorless solid; mp 147-148  $^\circ\text{C}$ ; yield 79% (79 mg);  $^1\text{H}$  NMR (500 MHz,  $\text{CDCl}_3$ )  $\delta$  7.87-7.83 (m, 3H), 7.77-7.76 (m, 3H), 7.62 (d,  $J = 8.0$  Hz, 2H), 7.52-7.49 (m, 2H), 7.42 (m, 1H), 7.30-7.29 (m, 3H), 7.20 (d,  $J = 8.0$  Hz, 2H), 6.09 (s, 1H), 4.92 (dd,  $J = 11.5, 3.0$  Hz, 1H), 3.95 (dd,  $J = 14.0, 3.5$  Hz, 1H), 3.51-3.46 (m, 1H), 2.38 (s, 3H), 1.02 (s, 9H);  $^{13}\text{C}\{^1\text{H}\}$  NMR (125 MHz,  $\text{CDCl}_3$ )  $\delta$  143.3, 139.0, 137.4, 135.6, 133.29, 133.26, 129.7, 129.4, 128.5, 128.4, 128.3, 128.2, 127.9, 127.7, 126.5, 126.4, 124.7, 123.8, 78.6, 72.3, 58.4, 45.5, 26.8, 21.6; FT-IR (KBr) 2975, 2926, 1341, 1161, 957, 815, 660  $\text{cm}^{-1}$ ; HRMS (ESI)  $m/z$   $[\text{M}+\text{H}]^+$  calcd for  $\text{C}_{30}\text{H}_{33}\text{N}_2\text{O}_3\text{S}$ : 501.2206, found: 501.2208.

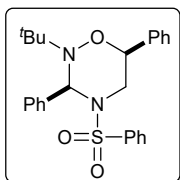

**2-(*tert*-Butyl)-3,6-diphenyl-4-(phenylsulfonyl)-1,2,4-oxadiazinane (±)-3ai.**

Analytical TLC on silica gel, 1:9 ethyl acetate/hexane  $R_f = 0.50$ ; colorless solid; mp 172-173 °C; yield 70% (61 mg);  $^1\text{H}$  NMR (400 MHz,  $\text{CDCl}_3$ )  $\delta$  7.73-7.71 (m, 4H), 7.52-7.48 (m, 1H), 7.41-7.34 (m, 5H), 7.31-7.28 (m, 5H), 6.05 (s, 1H), 4.73 (dd,  $J = 14.0, 3.5$  Hz, 1H), 3.87 (dd,  $J = 17.5, 4.0$  Hz, 1H), 3.44-3.38 (m, 1H), 0.98 (s, 9H);  $^{13}\text{C}\{^1\text{H}\}$  NMR (125 MHz,  $\text{CDCl}_3$ )  $\delta$  140.2, 138.8, 138.1, 132.5, 129.6, 128.8, 128.45, 128.47, 128.40, 127.6, 125.9, 78.6, 72.4, 58.3, 45.6, 26.7; FT-IR (KBr) 2924, 1452, 1348, 1164, 959, 735, 696, 594  $\text{cm}^{-1}$ ; HRMS (ESI)  $m/z$   $[\text{M}+\text{H}]^+$  calcd for  $\text{C}_{25}\text{H}_{29}\text{N}_2\text{O}_3\text{S}$ : 437.1893, found: 437.1898.

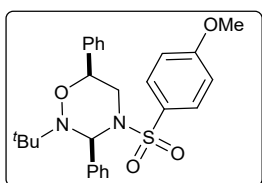

**2-(*tert*-Butyl)-4-((4-methoxyphenyl)sulfonyl)-3,6-diphenyl-1,2,4-**

**oxadiazinane (±)-3aj.** Analytical TLC on silica gel, 1:9 ethyl acetate/hexane  $R_f = 0.42$ ; colorless solid; mp 204-205 °C; yield 72% (67 mg);  $^1\text{H}$  NMR (500 MHz,  $\text{CDCl}_3$ )  $\delta$  7.73-7.71 (m, 2H), 7.63 (d,  $J = 8.5$  Hz, 2H), 7.41-7.38 (m, 2H), 7.35-7.28 (m, 6H), 6.85 (d,  $J = 9.0$  Hz, 2H), 6.05 (s, 1H), 4.75 (dd,  $J = 11.5, 3.0$  Hz, 1H), 3.83-3.79 (m, 4H), 3.40-3.35 (m, 1H), 0.99 (s, 9H);  $^{13}\text{C}\{^1\text{H}\}$  NMR (150 MHz,  $\text{CDCl}_3$ )  $\delta$  162.8, 139.0, 138.2, 131.9, 129.77, 129.70, 128.7, 128.4, 128.39, 128.33, 125.8, 113.9, 78.5, 72.3, 58.3, 55.7, 45.5, 26.7; FT-IR (KBr) 2972, 2932, 1597, 1495, 1340, 1157, 958, 702  $\text{cm}^{-1}$ ; HRMS (ESI)  $m/z$   $[\text{M}+\text{H}]^+$  calcd for  $\text{C}_{26}\text{H}_{31}\text{N}_2\text{O}_4\text{S}$ : 467.1999, found: 467.2001.

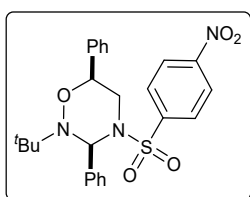

**2-(*tert*-Butyl)-4-((4-nitrophenyl)sulfonyl)-3,6-diphenyl-1,2,4-**

**oxadiazinane (±)-3ak.** Analytical TLC on silica gel, 1:9 ethyl acetate/hexane  $R_f = 0.44$ ; colorless solid; mp 179-180 °C; yield 81% (78 mg);  $^1\text{H}$  NMR (500 MHz,  $\text{CDCl}_3$ )  $\delta$  8.16 (d,  $J = 8.5$  Hz, 2H), 7.76 (d,  $J = 8.5$  Hz, 2H), 7.67 (d,  $J = 7.5$  Hz, 2H), 7.43-7.40 (m, 2H), 7.38-7.37 (m, 1H), 7.34-7.30 (m, 3H), 7.28-7.26 (m, 2H), 6.03 (s, 1H), 4.89 (dd,  $J = 11.5, 3.0$  Hz, 1H), 3.91 (dd,  $J = 13.5, 3.5$  Hz, 1H), 3.41-3.36 (m, 1H), 0.99 (s, 9H);  $^{13}\text{C}\{^1\text{H}\}$  NMR (125 MHz,  $\text{CDCl}_3$ )  $\delta$  149.8, 145.6, 138.2, 137.6, 129.6, 128.9, 128.8, 128.7, 128.66, 128.63, 125.9, 123.8,

78.9, 72.8, 58.7, 45.8, 26.7; FT-IR (KBr) 2975, 2924, 1528, 1350, 1162, 949, 738, 611  $\text{cm}^{-1}$ ; HRMS (ESI)  $m/z$   $[M+H]^+$  calcd for  $\text{C}_{25}\text{H}_{28}\text{N}_3\text{O}_5\text{S}$ : 482.1744, found: 482.1748.

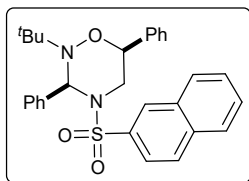

**2-(*tert*-Butyl)-4-(naphthalen-2-ylsulfonyl)-3,6-diphenyl-1,2,4-**

**oxadiazinane ( $\pm$ )-3al.** Analytical TLC on silica gel, 1:9 ethyl acetate/hexane  $R_f = 0.46$ ; colorless solid; mp 131-132  $^{\circ}\text{C}$ ; yield 76% (74 mg);  $^1\text{H}$  NMR (500 MHz,  $\text{CDCl}_3$ )  $\delta$  8.24 (s, 1H), 7.86-7.83 (m, 3H), 7.76-7.74 (m, 2H), 7.69-7.68 (m, 1H), 7.62-7.55 (m, 2H), 7.38-7.35 (m, 2H), 7.33 (d,  $J = 7.0$  Hz, 1H), 7.28-7.26 (m, 5H), 6.14 (s, 1H), 4.75 (dd,  $J = 11.0, 3.0$  Hz, 1H), 3.92 (dd,  $J = 14.0, 3.5$  Hz, 1H), 3.45-3.40 (m, 1H), 0.97 (s, 9H);  $^{13}\text{C}\{^1\text{H}\}$  NMR (125 MHz,  $\text{CDCl}_3$ )  $\delta$  138.8, 138.1, 137.1, 134.7, 132.1, 129.6, 129.2, 128.95, 128.91, 128.7, 128.48, 128.44, 128.42, 127.9, 127.4, 125.8, 123.0, 78.7, 72.4, 58.4, 45.6, 26.7; FT-IR (KBr) 2972, 2927, 1333, 1160, 960, 702, 657  $\text{cm}^{-1}$ ; HRMS (ESI)  $m/z$   $[M+H]^+$  calcd for  $\text{C}_{29}\text{H}_{31}\text{N}_2\text{O}_3\text{S}$ : 487.2050, found: 487.2053.

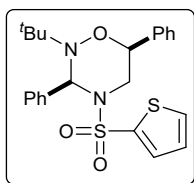

**2-(*tert*-Butyl)-3,6-diphenyl-4-(thiophen-2-ylsulfonyl)-1,2,4-oxadiazinane**

**( $\pm$ )-3am.** Analytical TLC on silica gel, 1:9 ethyl acetate/hexane  $R_f = 0.45$ ; colorless solid; mp 129-130  $^{\circ}\text{C}$ ; yield 73% (65 mg);  $^1\text{H}$  NMR (400 MHz,  $\text{CDCl}_3$ )  $\delta$  7.76-7.74 (m, 2H), 7.51 (dd,  $J = 5.2, 1.2$  Hz, 1H), 7.43-7.39 (m, 2H), 7.37-7.34 (m, 4H), 7.31-7.29 (m, 3H), 6.99-6.97 (m, 1H), 6.06 (s, 1H), 4.84 (dd,  $J = 11.6, 3.2$  Hz, 1H), 3.93 (dd,  $J = 13.6, 3.2$  Hz, 1H), 3.49-3.43 (m, 1H), 1.00 (s, 9H);  $^{13}\text{C}\{^1\text{H}\}$  NMR (125 MHz,  $\text{CDCl}_3$ )  $\delta$  141.0, 138.6, 138.1, 132.3, 131.8, 129.7, 128.8, 128.5, 128.4, 127.1, 125.8, 78.6, 72.6, 58.4, 45.7, 26.7; FT-IR (KBr) 2974, 1453, 1352, 1157, 1014, 959, 732, 666  $\text{cm}^{-1}$ ; HRMS (ESI)  $m/z$   $[M+H]^+$  calcd for  $\text{C}_{23}\text{H}_{27}\text{N}_2\text{O}_3\text{S}_2$ : 443.1458, found: 443.1449.

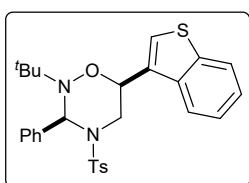

**6-(Benzo[*b*]thiophen-3-yl)-2-(*tert*-butyl)-3-phenyl-4-tosyl-1,2,4-**

**oxadiazinane ( $\pm$ )-3ao.** Analytical TLC on silica gel, 1:9 ethyl acetate/hexane  $R_f = 0.52$ ; colorless solid; mp 151-152  $^{\circ}\text{C}$ ; yield 59% (60 mg);  $^1\text{H}$  NMR (400 MHz,  $\text{CDCl}_3$ )  $\delta$  7.89-7.87

(m, 1H), 7.77-7.75 (m, 2H), 7.69 (d,  $J = 8.4$  Hz, 2H), 7.61-7.59 (m, 1H), 7.47 (s, 1H), 7.40-7.37 (m, 2H), 7.31-7.29 (m, 3H), 7.24 (d,  $J = 8$  Hz, 2H), 6.13 (s, 1H), 5.10 (dd,  $J = 11.2, 2.8$  Hz), 3.96 (dd,  $J = 14.0, 3.2$  Hz), 3.64-3.59 (m, 1H), 2.40 (s, 3H), 1.00 (s, 9H);  $^{13}\text{C}\{^1\text{H}\}$  NMR (125 MHz,  $\text{CDCl}_3$ )  $\delta$  143.5, 140.4, 139.0, 137.5, 137.4, 133.1, 129.6, 129.5, 128.5, 128.4, 127.8, 124.8, 124.5, 123.2, 123.0, 121.7, 73.9, 72.6, 58.4, 44.4, 26.9, 21.6; FT-IR (KBr) 2925, 1455, 1346, 1161, 955, 817, 733  $\text{cm}^{-1}$ ; HRMS (ESI)  $m/z$   $[\text{M}+\text{H}]^+$  calcd for  $\text{C}_{28}\text{H}_{31}\text{N}_2\text{O}_3\text{S}_2$ : 507.1771, found: 507.1780.

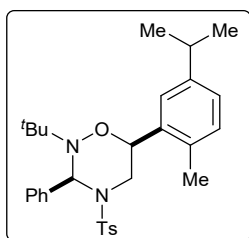

**2-(*tert*-Butyl)-6-(5-isopropyl-2-methylphenyl)-3-phenyl-4-tosyl-1,2,4-**

**oxadiazinane ( $\pm$ )-3ar.** Analytical TLC on silica gel, 1:9 ethyl acetate/hexane  $R_f = 0.52$ ; yellow solid; mp 186-187  $^\circ\text{C}$ ; yield 78% (79 mg);  $^1\text{H}$  NMR (500 MHz,  $\text{CDCl}_3$ )  $\delta$  7.83 (s, 2H), 7.70 (d,  $J = 8.0$  Hz, 2H), 7.33-7.32 (m, 4H), 7.23 (d,  $J = 7.5$  Hz, 2H), 7.11-7.07 (m, 2H), 6.12 (s, 1H), 4.85 (dd,  $J = 11.0, 3.0$  Hz, 1H), 3.72 (dd,  $J = 15.5, 3.5$  Hz, 1H), 3.47-3.42 (m, 1H), 2.96-2.88 (m, 1H), 2.40 (s, 3H), 2.14 (s, 3H), 1.27 (d,  $J = 7.0$  Hz, 6H), 0.99 (s, 9H);  $^{13}\text{C}\{^1\text{H}\}$  NMR (125 MHz,  $\text{CDCl}_3$ )  $\delta$  146.9, 143.3, 139.2, 137.8, 136.1, 132.6, 130.6, 129.7, 129.3, 128.4, 128.2, 127.9, 126.3, 123.5, 75.9, 72.3, 58.2, 44.4, 33.8, 26.8, 24.2, 24.0, 21.6, 18.7; FT-IR (KBr) 2960, 1457, 1348, 1162, 959, 748, 659  $\text{cm}^{-1}$ ; HRMS (ESI)  $m/z$   $[\text{M}+\text{H}]^+$  calcd for  $\text{C}_{30}\text{H}_{39}\text{N}_2\text{O}_3\text{S}$ : 507.2676, found: 507.2675.

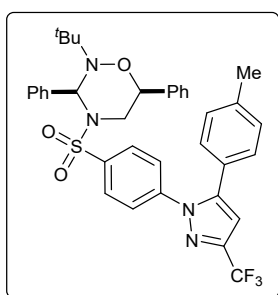

**2-(*tert*-Butyl)-3,6-diphenyl-4-((4-(5-(*p*-tolyl)-3-(trifluoromethyl)-**

**1H-pyrazol-1-yl)phenyl)sulfonyl)-1,2,4-oxadiazinane ( $\pm$ )-3as.** Analytical TLC on silica gel, 1:9 ethyl acetate/hexane  $R_f = 0.40$ ; colorless solid; mp 247-248  $^\circ\text{C}$ ; yield 69% (91 mg);  $^1\text{H}$  NMR (400 MHz,  $\text{CDCl}_3$ )  $\delta$  7.73-7.68 (m, 4H), 7.43-7.34 (m, 5H), 7.30-7.29 (m, 5H), 7.08-7.03 (m, 4H), 6.71 (s, 1H), 6.04 (s, 1H), 4.75 (dd,  $J = 11.6, 3.2$  Hz, 1H), 3.84 (dd,  $J = 14.0, 3.2$  Hz, 1H), 3.43-3.37 (m, 1H), 2.28 (s, 3H), 0.98 (s, 9H);  $^{13}\text{C}\{^1\text{H}\}$  NMR (150 MHz,  $\text{CDCl}_3$ )  $\delta$  145.2, 144.5 (q,  $J_{\text{C-F}} = 38.5$  Hz), 142.4, 139.83, 139.82, 138.6, 137.8, 129.8, 129.6, 128.9, 128.8,

128.63, 128.60, 128.59, 128.53, 125.89, 125.84, 125.3, 123.8 (q,  $J_{C-F} = 267.7$  Hz), 106.4, 78.6, 72.6, 58.4, 45.7, 26.7, 21.3;  $^{19}\text{F}$  NMR (471 MHz,  $\text{CDCl}_3$ )  $\delta$  -62.430; FT-IR (KBr) 2927, 1470, 1358, 1236, 1164, 1099, 755  $\text{cm}^{-1}$ ; HRMS (ESI)  $m/z$   $[\text{M}+\text{H}]^+$  calcd for  $\text{C}_{36}\text{H}_{36}\text{F}_3\text{N}_4\text{O}_3\text{S}$ : 661.2455, found: 661.2462.

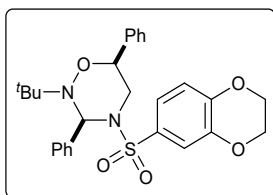

**2-(*tert*-Butyl)-4-((2,3-dihydrobenzo[*b*][1,4]dioxin-6-yl)sulfonyl)-3,6-diphenyl-1,2,4-oxadiazinane ( $\pm$ )-3at.** Analytical TLC on silica gel, 1:9 ethyl acetate/hexane  $R_f = 0.42$ ; colorless solid; mp 188-189  $^{\circ}\text{C}$ ; yield 70% (69 mg);  $^1\text{H}$  NMR (500 MHz,  $\text{CDCl}_3$ )  $\delta$  7.73-7.71 (m, 2H), 7.41-7.38 (m, 2H), 7.35-7.31 (m, 3H), 7.29-7.28 (m, 3H), 7.26-7.24 (m, 1H), 7.19 (dd,  $J = 8.5, 2.0$  Hz, 1H), 6.84 (d,  $J = 8.5$  Hz, 1H), 6.02 (s, 1H), 4.76 (dd,  $J = 11.0, 2.5$  Hz, 1H), 4.28-4.24 (m, 4H), 3.82 (dd,  $J = 14.0, 3.0$  Hz, 1H), 3.41-3.36 (m, 1H), 0.99 (s, 9H);  $^{13}\text{C}\{^1\text{H}\}$  NMR (125 MHz,  $\text{CDCl}_3$ )  $\delta$  147.2, 143.3, 138.9, 138.3, 132.7, 129.7, 128.8, 128.4, 128.38, 128.32, 125.8, 121.3, 117.5, 117.4, 78.5, 72.3, 64.6, 64.2, 58.3, 45.6, 26.7; FT-IR (KBr) 2927, 1494, 1285, 1253, 1155, 958, 699  $\text{cm}^{-1}$ ; HRMS (ESI)  $m/z$   $[\text{M}+\text{H}]^+$  calcd for  $\text{C}_{27}\text{H}_{31}\text{N}_2\text{O}_5\text{S}$ : 495.1948, found: 495.1956.

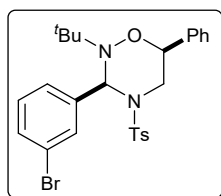

**3-(3-Bromophenyl)-2-(*tert*-butyl)-6-phenyl-4-tosyl-1,2,4-oxadiazinane ( $\pm$ )-3ba.** Analytical TLC on silica gel, 1:9 ethyl acetate/hexane  $R_f = 0.54$ ; colorless solid; mp 174-175  $^{\circ}\text{C}$ ; yield 65% (69 mg);  $^1\text{H}$  NMR (500 MHz,  $\text{CDCl}_3$ )  $\delta$  7.86 (s, 1H), 7.70 (d,  $J = 8.0$  Hz, 1H), 7.62 (d,  $J = 8.0$  Hz, 2H), 7.43-7.38 (m, 3H), 7.36-7.33 (m, 1H), 7.29-7.28 (m, 2H), 7.23-7.21 (d,  $J = 8.0$  Hz, 2H), 7.15 (t,  $J = 8.0$  Hz, 1H), 5.99 (s, 1H), 4.73 (dd,  $J = 11.0, 3.0$  Hz, 1H), 3.85 (dd,  $J = 14.0, 3.5$  Hz, 1H), 3.37-3.32 (m, 1H), 2.40 (s, 3H), 1.00 (s, 9H);  $^{13}\text{C}\{^1\text{H}\}$  NMR (125 MHz,  $\text{CDCl}_3$ )  $\delta$  143.5, 141.1, 137.9, 137.2, 132.5, 131.3, 130.0, 129.5, 128.8, 128.5, 128.1, 127.6, 125.9, 122.4, 78.7, 71.4, 58.4, 45.5, 26.8, 21.6; FT-IR (KBr) 2924, 1345, 1162, 959, 748, 659, 583  $\text{cm}^{-1}$ ; HRMS (ESI)  $m/z$   $[\text{M}+\text{H}]^+$  calcd for  $\text{C}_{26}\text{H}_{30}\text{BrN}_2\text{O}_3\text{S}$ : 529.1155, found: 529.1158.

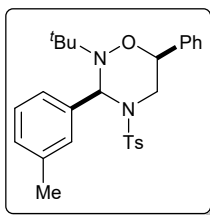

**2-(*tert*-Butyl)-6-phenyl-3-(*m*-tolyl)-4-tosyl-1,2,4-oxadiazinane (±)-3ca.**

Analytical TLC on silica gel, 1:9 ethyl acetate/hexane  $R_f = 0.56$ ; colorless solid; mp 184-185 °C; yield 77% (72 mg);  $^1\text{H}$  NMR (500 MHz,  $\text{CDCl}_3$ )  $\delta$  7.62-7.60 (m, 3H), 7.44 (s, 1H), 7.40-7.37 (m, 2H), 7.35-7.29 (m, 3H), 7.20 (d,  $J = 8.0$  Hz, 2H), 7.17-7.14 (m, 1H), 7.11-7.09 (m, 1H), 6.01 (s, 1H), 4.71 (dd,  $J = 11.0, 3.0$  Hz, 1H), 3.83 (dd,  $J = 14.5, 3.5$  Hz, 1H), 3.43-3.38 (m, 1H), 2.39 (s, 3H), 2.32 (s, 3H), 0.99 (s, 9H);  $^{13}\text{C}\{^1\text{H}\}$  NMR (150 MHz,  $\text{CDCl}_3$ )  $\delta$  143.2, 138.8, 138.3, 137.9, 137.4, 130.3, 129.3, 128.9, 128.7, 128.3, 128.2, 127.7, 126.7, 125.8, 78.5, 72.3, 58.3, 45.6, 26.8, 21.66, 21.62; FT-IR (KBr) 2978, 2924, 1344, 1161, 964, 744, 661  $\text{cm}^{-1}$ ; HRMS (ESI)  $m/z$   $[\text{M}+\text{H}]^+$  calcd for  $\text{C}_{27}\text{H}_{33}\text{N}_2\text{O}_3\text{S}$ : 465.2206, found: 465.2211.

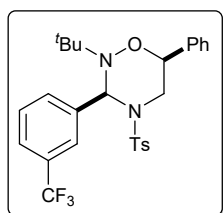

**2-(*tert*-Butyl)-6-phenyl-4-tosyl-3-(3-(trifluoromethyl)phenyl)-1,2,4-**

**oxadiazinane (±)-3da.** Analytical TLC on silica gel, 1:9 ethyl acetate/hexane  $R_f = 0.48$ ; colorless solid; mp 128-129 °C; yield 70% (73 mg);  $^1\text{H}$  NMR (400 MHz,  $\text{CDCl}_3$ )  $\delta$  8.06 (s, 1H), 7.91 (d,  $J = 7.6$  Hz, 1H), 7.61-7.55 (m, 3H), 7.44-7.33 (m, 4H), 7.29-7.27 (m, 2H), 7.21 (d,  $J = 8.4$  Hz, 2H), 6.10 (s, 1H), 4.74 (dd,  $J = 11.2, 3.2$  Hz, 1H), 3.85 (dd,  $J = 14.0, 3.2$  Hz, 1H), 3.35-3.28 (m, 1H), 2.39 (s, 3H), 0.99 (s, 9H);  $^{13}\text{C}\{^1\text{H}\}$  NMR (125 MHz,  $\text{CDCl}_3$ )  $\delta$  143.6, 139.8, 137.8, 137.1, 132.8, 130.7 (q,  $J_{\text{C-F}} = 32.2$  Hz), 129.5, 129.0, 128.9, 128.6, 127.5, 126.3 (q,  $J_{\text{C-F}} = 4.1$  Hz), 125.9, 125.18 (q,  $J_{\text{C-F}} = 270.7$  Hz), 125.10 (q,  $J_{\text{C-F}} = 3.6$  Hz), 78.9, 71.4, 58.4, 45.6, 26.8, 21.6;  $^{19}\text{F}$  NMR (377 MHz,  $\text{CDCl}_3$ )  $\delta$  -62.752; FT-IR (KBr) 2978, 2924, 1329, 1163, 1127, 964, 745, 664  $\text{cm}^{-1}$ ; HRMS (ESI)  $m/z$   $[\text{M}+\text{H}]^+$  calcd for  $\text{C}_{27}\text{H}_{30}\text{F}_3\text{N}_2\text{O}_3\text{S}$ : 519.1924, found: 519.1933.

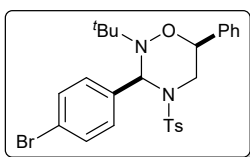

**3-(4-Bromophenyl)-2-(*tert*-butyl)-6-phenyl-4-tosyl-1,2,4-**

**oxadiazinane (±)-3ea.** Analytical TLC on silica gel, 1:2 ethyl acetate/hexane  $R_f = 0.42$ ; colorless solid; mp 149-150 °C; yield 75% (79 mg);  $^1\text{H}$  NMR (400 MHz,  $\text{CDCl}_3$ )  $\delta$  7.62-7.59

(m, 4H), 7.42-7.32 (m, 5H), 7.28-7.26 (m, 2H), 7.22 (d,  $J = 8.4$  Hz, 2H), 6.01 (s, 1H), 4.71 (dd,  $J = 11.6, 3.2$  Hz, 1H), 3.85 (dd,  $J = 14.0, 3.2$  Hz, 1H), 3.36-3.29 (m, 1H), 2.40 (s, 3H), 0.99 (s, 9H);  $^{13}\text{C}\{^1\text{H}\}$  NMR (125 MHz,  $\text{CDCl}_3$ )  $\delta$  143.5, 138.0, 137.9, 137.2, 131.5, 131.2, 129.5, 128.8, 128.5, 127.6, 125.8, 122.5, 78.5, 71.5, 58.4, 45.4, 26.8, 21.6; FT-IR (KBr) 2978, 1485, 1345, 1161, 959, 745, 659, 585  $\text{cm}^{-1}$ ; HRMS (ESI)  $m/z$   $[\text{M}+\text{H}]^+$  calcd for  $\text{C}_{26}\text{H}_{30}\text{BrN}_2\text{O}_3\text{S}$ : 529.1155, found: 529.1162.

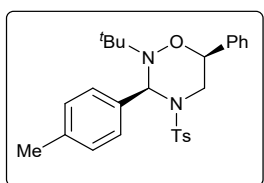

**(3*S*,6*S*)-2-(*tert*-Butyl)-6-phenyl-3-(*p*-tolyl)-4-tosyl-1,2,4-oxadiazinane**

**3fa'**. Analytical TLC on silica gel, 1:9 ethyl acetate/hexane  $R_f = 0.52$ ; colorless solid; mp 197-198  $^\circ\text{C}$ ; yield 82% (76 mg);  $^1\text{H}$  NMR (600 MHz,  $\text{CDCl}_3$ )  $\delta$  7.61 (d,  $J = 7.8$  Hz, 4H), 7.40-7.37 (m, 2H), 7.34-7.32 (m, 1H), 7.30-7.29 (m, 2H), 7.19 (d,  $J = 7.8$  Hz, 2H), 7.09 (d,  $J = 7.8$  Hz, 2H), 6.02 (s, 1H), 4.70 (dd,  $J = 11.4, 3.0$  Hz, 1H), 3.81 (dd,  $J = 13.8, 3.0$  Hz, 1H), 3.40-3.36 (m, 1H), 2.38 (s, 3H), 2.33 (s, 3H), 0.98 (s, 9H);  $^{13}\text{C}\{^1\text{H}\}$  NMR (150 MHz,  $\text{CDCl}_3$ )  $\delta$  143.2, 138.3, 138.0, 137.4, 136.0, 129.5, 129.3, 129.0, 128.7, 128.3, 127.7, 125.8, 78.5, 72.2, 58.2, 45.6, 26.7, 21.6, 21.2; FT-IR (KBr) 2922, 1343, 1161, 959, 750, 659, 593  $\text{cm}^{-1}$ ; HRMS (ESI)  $m/z$   $[\text{M}+\text{H}]^+$  calcd for  $\text{C}_{27}\text{H}_{33}\text{N}_2\text{O}_3\text{S}$ : 465.2206, found: 465.2208;  $[\alpha]_D^{21.0} = +50$  ( $c = 0.02$ ,  $\text{CHCl}_3$ ); HPLC: 94% *ee* [YMC Chiral ART Cellulose-SC, hexane/ $i$ PrOH = 95:05, flow rate: 1 mL/min,  $\lambda = 254$  nm,  $t_R = 12.94$  min (major), 18.95 min (minor)].

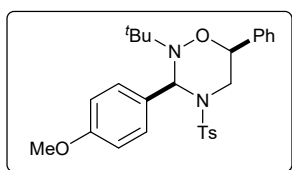

**2-(*tert*-Butyl)-3-(4-methoxyphenyl)-6-phenyl-4-tosyl-1,2,4-**

**oxadiazinane ( $\pm$ )-3ga**. Analytical TLC on silica gel, 1:9 ethyl acetate/hexane  $R_f = 0.42$ ; colorless solid; mp 195-196  $^\circ\text{C}$ ; yield 84% (81 mg);  $^1\text{H}$  NMR (400 MHz,  $\text{CDCl}_3$ )  $\delta$  7.65-7.59 (m, 4H), 7.41-7.33 (m, 3H), 7.30-7.28 (m, 2H), 7.20 (d,  $J = 8.0$  Hz, 2H), 6.82 (d,  $J = 7.6$  Hz, 2H), 6.01 (s, 1H), 4.72 (dd,  $J = 11.2, 3.2$  Hz, 1H), 3.83-3.80 (m, 4H), 3.40-3.34 (m, 1H), 2.38 (s, 3H), 0.97 (s, 9H);  $^{13}\text{C}\{^1\text{H}\}$  NMR (125 MHz,  $\text{CDCl}_3$ )  $\delta$  159.5, 143.2, 138.3, 137.4, 131.3, 130.8, 129.3, 128.7, 128.3, 127.7, 125.8, 113.7, 78.5, 71.9, 58.2, 55.3, 45.5, 26.7, 21.6; FT-IR (KBr) 2920, 1345, 1156, 942, 756, 720, 658  $\text{cm}^{-1}$ ; ; HRMS (ESI)  $m/z$   $[\text{M}+\text{H}]^+$  calcd for  $\text{C}_{27}\text{H}_{33}\text{N}_2\text{O}_4\text{S}$ : 481.2156; found: 481.2158.

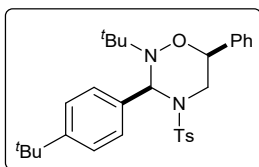

**2-(*tert*-Butyl)-3-(4-(*tert*-butyl)phenyl)-6-phenyl-4-tosyl-1,2,4-**

**oxadiazinane (±)-3ha.** Analytical TLC on silica gel, 1:9 ethyl acetate/hexane  $R_f = 0.55$ ; colorless solid; mp 164-165 °C; yield 79% (80 mg);  $^1\text{H}$  NMR (500 MHz,  $\text{CDCl}_3$ )  $\delta$  7.62 (d,  $J = 8.0$  Hz, 2H), 7.55 (d,  $J = 8.0$  Hz, 2H), 7.40-7.38 (m, 2H), 7.35-7.31 (m, 3H), 7.27-7.26 (m, 2H), 7.14 (d,  $J = 8.0$  Hz, 2H), 6.02 (s, 1H), 4.77 (dd,  $J = 11.0, 2.5$  Hz, 1H), 3.84 (dd,  $J = 13.5, 3.0$  Hz, 1H), 3.40-3.35 (m, 1H), 2.35 (s, 3H), 1.30 (s, 9H), 0.98 (s, 9H);  $^{13}\text{C}\{^1\text{H}\}$  NMR (125 MHz,  $\text{CDCl}_3$ )  $\delta$  151.3, 143.0, 138.4, 137.3, 135.7, 129.3, 129.2, 128.7, 128.3, 127.7, 125.8, 125.2, 78.6, 72.2, 58.3, 45.7, 34.6, 31.4, 26.7, 21.5; FT-IR (KBr) 2965, 1346, 1163, 960, 730, 661, 592  $\text{cm}^{-1}$ ; HRMS (ESI)  $m/z$   $[\text{M}+\text{H}]^+$  calcd for  $\text{C}_{30}\text{H}_{39}\text{N}_2\text{O}_3\text{S}$ : 507.2676, found: 507.2686.

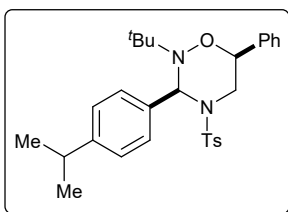

**2-(*tert*-Butyl)-3-(4-isopropylphenyl)-6-phenyl-4-tosyl-1,2,4-**

**oxadiazinane (±)-3ja.** Analytical TLC on silica gel, 1:9 ethyl acetate/hexane  $R_f = 0.50$ ; colorless solid; mp 131-132 °C; yield 76% (75 mg);  $^1\text{H}$  NMR (400 MHz,  $\text{CDCl}_3$ )  $\delta$  7.62 (d,  $J = 8.0$  Hz, 2H), 7.55 (d,  $J = 8.4$  Hz, 2H), 7.41-7.37 (m, 2H), 7.35-7.30 (m, 3H), 7.15-7.10 (m, 4H), 6.01 (s, 1H), 4.76 (dd,  $J = 11.2, 3.2$  Hz, 1H), 3.84 (dd,  $J = 13.6, 3.2$  Hz, 1H), 3.39-3.33 (m, 1H), 2.90-2.84 (m, 1H), 2.36 (s, 3H), 1.24 (d,  $J = 7.6$  Hz, 6H) 0.97 (s, 9H);  $^{13}\text{C}\{^1\text{H}\}$  NMR (125 MHz,  $\text{CDCl}_3$ )  $\delta$  149.0, 143.0, 138.4, 137.3, 136.1, 129.6, 129.3, 128.7, 128.3, 127.7, 126.3, 125.8, 78.5, 72.3, 58.3, 45.7, 33.9, 26.7, 24.1, 24.0, 21.6; FT-IR (KBr) 2963, 1345, 1162, 960, 814, 661, 548  $\text{cm}^{-1}$ ; HRMS (ESI)  $m/z$   $[\text{M}+\text{H}]^+$  calcd for  $\text{C}_{29}\text{H}_{37}\text{N}_2\text{O}_3\text{S}$ : 493.2519, found: 493.2519.

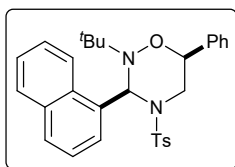

**2-(*tert*-Butyl)-3-(naphthalen-1-yl)-6-phenyl-4-tosyl-1,2,4-oxadiazinane**

**(±)-3ka.** Analytical TLC on silica gel, 1:9 ethyl acetate/hexane  $R_f = 0.48$ ; colorless solid; mp 229-230 °C; yield 74% (74 mg);  $^1\text{H}$  NMR (500 MHz,  $\text{CDCl}_3$ )  $\delta$  8.69 (d,  $J = 8.0$  Hz, 2H), 7.88 (d,  $J = 8.0$  Hz, 1H), 7.84 (d,  $J = 8.0$  Hz, 1H), 7.72 (d,  $J = 7.5$  Hz, 2H), 7.67-7.64 (m, 1H), 7.54-7.51 (m, 1H), 7.42-7.31 (m, 6H), 7.20 (d,  $J = 7.5$  Hz, 2H), 7.15 (s, 1H), 4.76-4.74 (m, 1H),

3.72-3.69 (m, 1H), 3.58-3.53 (m, 1H), 2.38 (s, 3H), 1.02 (s, 9H);  $^{13}\text{C}\{^1\text{H}\}$  NMR (125 MHz,  $\text{CDCl}_3$ )  $\delta$  143.6, 138.3, 137.6, 134.2, 134.1, 131.2, 129.4, 129.2, 129.1, 128.9, 128.8, 128.4, 128.1, 127.1, 126.0, 125.7, 124.5, 123.7, 78.4, 65.9, 58.4, 45.4, 27.0, 21.6; FT-IR (KBr) 2974, 1346, 1159, 944, 810, 741, 664  $\text{cm}^{-1}$ ; HRMS (ESI)  $m/z$   $[\text{M}+\text{H}]^+$  calcd for  $\text{C}_{30}\text{H}_{33}\text{N}_2\text{O}_3\text{S}$ : 501.2206, found: 501.2215.

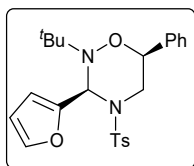

**(3*S*,6*S*)-2-(*tert*-Butyl)-3-(furan-2-yl)-6-phenyl-4-tosyl-1,2,4-oxadiazinane**

**3la'**. Analytical TLC on silica gel, 1:9 ethyl acetate/hexane  $R_f$  = 0.48; thick liquid; yield 85% (75 mg);  $^1\text{H}$  NMR (500 MHz,  $\text{CDCl}_3$ )  $\delta$  7.55 (d,  $J$  = 7.5 Hz, 2H), 7.38-7.35 (m, 2H), 7.33-7.30 (m, 4H), 7.18 (d,  $J$  = 8.0 Hz, 2H), 6.336-6.330 (m, 1H), 6.25-6.24 (m, 1H), 6.16 (s, 1H), 4.80 (dd,  $J$  = 10.5, 1.5 Hz, 1H), 3.81 (dd,  $J$  = 13.0, 2.5 Hz, 1H), 3.29-3.24 (m, 1H), 2.37 (s, 3H), 0.96 (s, 9H);  $^{13}\text{C}\{^1\text{H}\}$  NMR (125 MHz,  $\text{CDCl}_3$ )  $\delta$  150.4, 143.2, 141.3, 138.3, 136.7, 129.3, 128.7, 128.4, 127.6, 126.0, 110.6, 110.2, 78.6, 66.0, 58.2, 46.7, 26.0, 21.6; FT-IR (neat) 2978, 1347, 1223, 1161, 965, 748, 659  $\text{cm}^{-1}$ ; HRMS (ESI)  $m/z$   $[\text{M}+\text{H}]^+$  calcd for  $\text{C}_{24}\text{H}_{29}\text{N}_2\text{O}_4\text{S}$ : 441.1843, found: 441.1847;  $[\alpha]_{\text{D}}^{21.0}$  = +135 ( $c$  = 0.02,  $\text{CHCl}_3$ ); HPLC: 95% *ee* [YMC Chiral ART Cellulose-SC, hexane/*i*PrOH = 96:04, flow rate: 1 mL /min,  $\lambda$  = 254 nm,  $t_R$  = 17.14 min (major), 20.52 min (minor)].

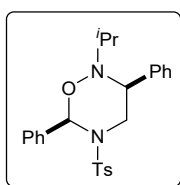

**2-Isopropyl-3,6-diphenyl-5-tosyl-1,2,5-oxadiazinane ( $\pm$ )-4na.**

Analytical TLC on silica gel, 1:15 ethyl acetate/hexane  $R_f$  = 0.56; colorless solid; mp 163-164  $^{\circ}\text{C}$ ; yield 65% (57 mg);  $^1\text{H}$  NMR (500 MHz,  $\text{CDCl}_3$ )  $\delta$  7.93 (d,  $J$  = 8.0 Hz, 2H), 7.59 (d,  $J$  = 7.5 Hz, 2H), 7.44-7.39 (m, 4H), 7.35-7.32 (m, 1H), 7.18-7.17 (m, 3H), 6.87-6.85 (m, 2H), 6.83 (s, 1H), 3.71-3.65 (m, 1H), 3.44-3.38 (m, 2H), 2.61-2.56 (m, 1H), 2.50 (s, 3H), 1.10 (d,  $J$  = 6.5 Hz, 3H), 0.57 (d,  $J$  = 6.5 Hz, 3H);  $^{13}\text{C}\{^1\text{H}\}$  NMR (125 MHz,  $\text{CDCl}_3$ )  $\delta$  143.9, 138.2, 137.7, 129.9, 128.8, 128.33, 128.31, 128.2, 127.8, 127.6, 127.4, 86.0, 61.5, 51.8, 47.5, 21.7, 21.2, 12.2; FT-IR (KBr) 2975, 2932, 1345, 1165, 959, 738, 687  $\text{cm}^{-1}$ ; HRMS (ESI)  $m/z$   $[\text{M}+\text{H}]^+$  calcd for  $\text{C}_{25}\text{H}_{29}\text{N}_2\text{O}_3\text{S}$ : 437.1893, found: 437.1896.

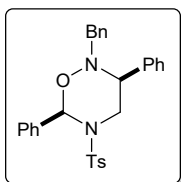

**2-Benzyl-3,6-diphenyl-5-tosyl-1,2,5-oxadiazinane (±)-40a.** Analytical TLC on silica gel, 1:15 ethyl acetate/hexane  $R_f = 0.48$ ; colorless solid; mp 166-167 °C; yield 70% (68 mg);  $^1\text{H}$  NMR (400 MHz,  $\text{CDCl}_3$ )  $\delta$  7.90 (d,  $J = 8.4$  Hz, 2H), 7.41 (d,  $J = 8.0$  Hz, 2H), 7.30-7.27 (m, 3H), 7.24-7.18 (m, 6H), 7.10-7.08 (m, 2H), 7.02-7.00 (m, 2H), 6.96-6.94 (m, 2H), 6.72 (s, 1H), 3.73-3.64 (m, 2H), 3.45-3.38 (m, 1H), 3.26 (dd,  $J = 11.2, 3.2$  Hz, 1H), 3.21 (d,  $J = 13.6$  Hz, 1H), 2.52 (s, 3H);  $^{13}\text{C}\{^1\text{H}\}$  NMR (125 MHz,  $\text{CDCl}_3$ )  $\delta$  144.0, 138.2, 137.7, 137.0, 136.7, 130.2, 129.9, 129.0, 128.5, 128.15, 128.13, 127.9, 127.7, 127.4, 127.2, 86.1, 65.9, 59.7, 47.4, 21.8; FT-IR (KBr) 2927, 1493, 1345, 1165, 1020, 746, 570  $\text{cm}^{-1}$ ; HRMS (ESI)  $m/z$   $[\text{M}+\text{H}]^+$  calcd for  $\text{C}_{29}\text{H}_{29}\text{N}_2\text{O}_3\text{S}$ : 485.1893, found: 485.1894.

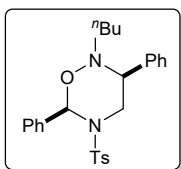

**2-Butyl-3,6-diphenyl-5-tosyl-1,2,5-oxadiazinane (±)-4pa.** Analytical TLC on silica gel, 1:15 ethyl acetate/hexane  $R_f = 0.52$ ; colorless solid; mp 133-134 °C; yield 68% (61 mg);  $^1\text{H}$  NMR (500 MHz,  $\text{CDCl}_3$ )  $\delta$  7.92 (d,  $J = 8.0$  Hz, 2H), 7.55 (d,  $J = 7.5$  Hz, 2H), 7.43-7.39 (m, 4H), 7.35-7.32 (m, 1H), 7.18-7.17 (m, 3H), 6.85-6.82 (m, 3H), 3.68-3.65 (m, 1H), 3.39-3.34 (m, 1H), 3.12 (dd,  $J = 11.0, 3.0$  Hz, 1H), 2.51 (s, 3H), 2.38-2.32 (m, 1H), 2.20-2.15 (m, 1H), 1.45-1.37 (m, 1H), 1.22-1.12 (m, 1H), 1.04-0.84 (m, 2H), 0.76 (t,  $J = 7.5$  Hz, 3H);  $^{13}\text{C}\{^1\text{H}\}$  NMR (125 MHz,  $\text{CDCl}_3$ )  $\delta$  144.0, 138.4, 137.9, 137.7, 129.9, 128.8, 128.37, 128.35, 128.1, 127.9, 127.6, 127.2, 86.1, 66.3, 55.6, 47.4, 28.2, 21.8, 20.3, 13.9; FT-IR (KBr) 2926, 1434, 1346, 1132, 1036, 754, 661  $\text{cm}^{-1}$ ; HRMS (ESI)  $m/z$   $[\text{M}+\text{H}]^+$  calcd for  $\text{C}_{26}\text{H}_{31}\text{N}_2\text{O}_3\text{S}$ : 451.2050, found: 451.2059.

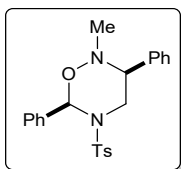

**2-Methyl-3,6-diphenyl-5-tosyl-1,2,5-oxadiazinane (±)-4qa.** Analytical TLC on silica gel, 1:15 ethyl acetate/hexane  $R_f = 0.56$ ; colorless solid; mp 165-166 °C; yield 67% (55 mg);  $^1\text{H}$  NMR (400 MHz,  $\text{CDCl}_3$ )  $\delta$  7.92 (d,  $J = 8.0$  Hz, 2H), 7.54-7.52 (m, 2H), 7.44-7.40 (m, 4H), 7.36-7.32 (m, 1H), 7.19-7.15 (m, 3H), 6.85-6.83 (m, 2H), 6.80 (s, 1H), 3.68 (dd,  $J = 14.8, 2.0$  Hz, 1H), 3.38-3.31 (m, 1H), 2.99 (dd,  $J = 11.2, 3.2$  Hz, 1H), 2.51 (s, 3H), 2.23 (s,

3H);  $^{13}\text{C}\{^1\text{H}\}$  NMR (125 MHz,  $\text{CDCl}_3$ )  $\delta$  144.1, 137.9, 137.8, 137.6, 129.9, 128.8, 128.54, 128.52, 128.1, 127.9, 127.6, 127.1, 86.3, 68.1, 47.1, 43.7, 21.8; FT-IR (KBr) 2922, 1345, 1165, 961, 750, 570  $\text{cm}^{-1}$ ; HRMS (ESI)  $m/z$   $[\text{M}+\text{H}]^+$  calcd for  $\text{C}_{23}\text{H}_{25}\text{N}_2\text{O}_3\text{S}$ : 409.1580, found: 409.1571.

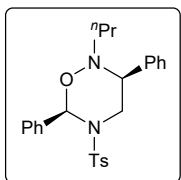

**(3S,6R)-3,6-Diphenyl-2-propyl-5-tosyl-1,2,5-oxadiazinane 4ra'**. Analytical

TLC on silica gel, 1:15 ethyl acetate/hexane  $R_f = 0.54$ ; thick liquid; yield 68% (59 mg);  $^1\text{H}$  NMR (500 MHz,  $\text{CDCl}_3$ )  $\delta$  7.91 (d,  $J = 8.0$  Hz, 2H), 7.55 (d,  $J = 7.5$  Hz, 2H), 7.43-7.39 (m, 4H), 7.35-7.32 (m, 1H), 7.18-7.17 (m, 3H), 6.85-6.82 (m, 3H), 3.68 (dd,  $J = 14.5, 2.0$  Hz, 1H), 3.39-3.34 (m, 1H), 3.11 (dd,  $J = 11.0, 3.0$  Hz, 1H), 2.51 (s, 3H), 2.30-2.25 (m, 1H), 2.19-2.14 (m, 1H), 1.57-1.51 (m, 2H), 0.68 (t,  $J = 7.5$  Hz, 3H);  $^{13}\text{C}\{^1\text{H}\}$  NMR (125 MHz,  $\text{CDCl}_3$ )  $\delta$  144.0, 138.4, 137.8, 137.7, 129.9, 128.8, 128.4, 128.3, 128.1, 127.9, 127.6, 127.2, 86.1, 66.4, 57.8, 47.3, 21.8, 19.4, 11.7; FT-IR (neat) 2962, 2927, 1488, 1345, 1167, 972, 697  $\text{cm}^{-1}$ ; HRMS (ESI)  $m/z$   $[\text{M}+\text{H}]^+$  calcd for  $\text{C}_{25}\text{H}_{29}\text{N}_2\text{O}_3\text{S}$ : 437.1893, found: 437.1897;  $[\alpha]_{\text{D}}^{21.0} = +45$  ( $c = 0.02$ ,  $\text{CHCl}_3$ ); HPLC: 97% *ee* [YMC Chiral ART Cellulose-SC, hexane/ $^i$ PrOH = 96:04, flow rate: 1 mL/min,  $\lambda = 254$  nm,  $t_R = 16.23$  min (minor), 18.67 min (major)].

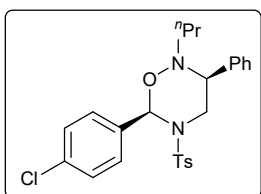

**(3S,6R)-6-(4-Chlorophenyl)-3-phenyl-2-propyl-5-tosyl-1,2,5-**

**oxadiazinane 4ta'**. Analytical TLC on silica gel, 1:15 ethyl acetate/hexane  $R_f = 0.52$ ; thick liquid; mp 172-173  $^{\circ}\text{C}$ ; yield 65% (61 mg);  $^1\text{H}$  NMR (400 MHz,  $\text{CDCl}_3$ )  $\delta$  7.90 (d,  $J = 8.4$  Hz, 2H), 7.49 (d,  $J = 8.0$  Hz, 2H), 7.43 (d,  $J = 8.0$  Hz, 2H), 7.38 (d,  $J = 8.4$  Hz, 2H), 7.20-7.19 (m, 3H), 6.85-6.82 (m, 2H), 6.77 (s, 1H), 3.67 (dd,  $J = 14.8, 2.0$  Hz, 1H), 3.34-3.27 (m, 1H), 3.08 (dd,  $J = 11.2, 3.2$  Hz, 1H), 2.51 (s, 3H), 2.31-2.24 (m, 1H), 2.18-2.12 (m, 1H), 1.54-1.47 (m, 2H), 0.68 (t,  $J = 7.2$  Hz, 3H);  $^{13}\text{C}\{^1\text{H}\}$  NMR (125 MHz,  $\text{CDCl}_3$ )  $\delta$  144.2, 138.2, 137.7, 136.3, 133.8, 129.9, 128.89, 128.82, 128.6, 128.4, 128.1, 127.5, 85.7, 66.3, 57.8, 47.3, 21.8, 19.4, 11.7; FT-IR (neat) 2962, 2924, 1488, 1348, 1162, 972, 674  $\text{cm}^{-1}$ ; HRMS (ESI)  $m/z$   $[\text{M}+\text{H}]^+$  calcd for  $\text{C}_{25}\text{H}_{28}\text{ClN}_2\text{O}_3\text{S}$ : 471.1504, found: 471.1504;  $[\alpha]_{\text{D}}^{20.6} = +35$  ( $c = 0.02$ ,  $\text{CHCl}_3$ ); HPLC: 95% *ee* [YMC Chiral ART Cellulose-SC, hexane/ $^i$ PrOH = 96:04, flow rate: 1 mL/min,  $\lambda = 254$  nm,  $t_R = 15.41$  min (minor), 17.78 min (major)].

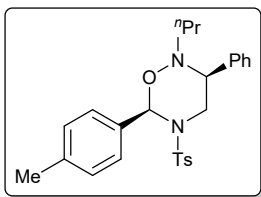

**(3*S*,6*R*)-3-Phenyl-2-propyl-6-(*p*-tolyl)-5-tosyl-1,2,5-oxadiazinane**

**4ua'**. Analytical TLC on silica gel, 1:15 ethyl acetate/hexane  $R_f = 0.56$ ; thick liquid; mp 134-135 °C; yield 67% (60 mg);  $^1\text{H NMR}$  (500 MHz,  $\text{CDCl}_3$ )  $\delta$  7.91 (d,  $J = 8.0$  Hz, 2H), 7.42-7.40 (m, 4H), 7.21-7.16 (m, 5H), 6.86-6.85 (m, 2H), 6.78 (s, 1H), 3.67 (dd,  $J = 15.0, 3.0$  Hz, 1H), 3.40-3.35 (m, 1H), 3.11 (dd,  $J = 11.5, 3.0$  Hz, 1H), 2.50 (s, 3H), 2.39 (s, 3H), 2.30-2.24 (m, 1H), 2.18-2.13 (m, 1H), 1.56-1.50 (m, 2H), 0.69 (t,  $J = 7.0$  Hz, 3H);  $^{13}\text{C}\{^1\text{H}\}$  NMR (125 MHz,  $\text{CDCl}_3$ )  $\delta$  143.9, 138.5, 137.9, 137.5, 134.6, 129.8, 129.1, 128.7, 128.3, 128.1, 127.6, 127.1, 86.1, 66.5, 57.8, 47.3, 21.8, 21.3, 19.4, 11.7; FT-IR (neat) 2924, 1254, 1165, 973, 738, 705  $\text{cm}^{-1}$ ; HRMS (ESI)  $m/z$   $[\text{M}+\text{H}]^+$  calcd for  $\text{C}_{26}\text{H}_{31}\text{N}_2\text{O}_3\text{S}$ : 451.2050, found: 451.2056;  $[\alpha]_{\text{D}}^{20.7} = +20$  ( $c = 0.02$ ,  $\text{CHCl}_3$ ); HPLC: 93% *ee* [YMC Chiral ART Cellulose-SC, hexane/ $i$ PrOH = 96:04, flow rate: 1 mL/min,  $\lambda = 254$  nm,  $t_R = 15.35$  min (minor), 17.29 min (major)].

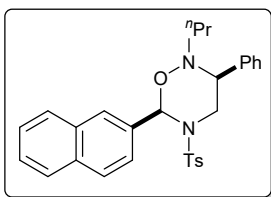

**(±)-4va. 6-(Naphthalen-2-yl)-3-phenyl-2-propyl-5-tosyl-1,2,5-oxadiazinane**

**(±)-4va**. Analytical TLC on silica gel, 1:15 ethyl acetate/hexane  $R_f = 0.50$ ; colorless solid; mp 189-190 °C; yield 70% (68 mg);  $^1\text{H NMR}$  (400 MHz,  $\text{CDCl}_3$ )  $\delta$  7.99 (s, 1H), 7.96 (d,  $J = 8.4$  Hz, 2H), 7.89-7.84 (m, 3H), 7.68-7.65 (m, 1H), 7.52-7.50 (m, 2H), 7.45-7.43 (m, 2H), 7.16-7.12 (m, 3H), 6.97 (s, 1H), 6.81-6.80 (m, 2H), 3.74 (dd,  $J = 14.8, 2.0$  Hz, 1H), 3.49-3.42 (m, 1H), 3.13 (dd,  $J = 11.2, 3.2$  Hz, 1H), 2.53 (s, 3H), 2.33-2.17 (m, 2H), 1.66-1.59 (m, 2H), 0.68 (t,  $J = 7.6$  Hz, 3H);  $^{13}\text{C}\{^1\text{H}\}$  NMR (125 MHz,  $\text{CDCl}_3$ )  $\delta$  144.1, 138.4, 137.9, 135.3, 133.3, 133.1, 129.9, 128.8, 128.4, 128.3, 128.2, 128.1, 127.7, 127.6, 126.3, 126.2, 126.1, 125.2, 86.3, 66.5, 57.9, 47.5, 21.8, 19.5, 11.8; FT-IR (KBr) 2927, 1343, 1165, 809, 748, 682, 560  $\text{cm}^{-1}$ ; HRMS (ESI)  $m/z$   $[\text{M}+\text{H}]^+$  calcd for  $\text{C}_{29}\text{H}_{31}\text{N}_2\text{O}_3\text{S}$ : 487.2050, found: 487.2056.

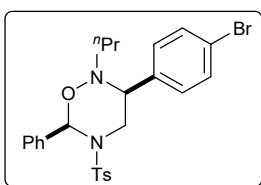

**(±)-4rc. 3-(4-Bromophenyl)-6-phenyl-2-propyl-5-tosyl-1,2,5-oxadiazinane**

**(±)-4rc**. Analytical TLC on silica gel, 1:15 ethyl acetate/hexane  $R_f = 0.54$ ; colorless solid; mp

180-181 °C; yield 75% (77 mg);  $^1\text{H}$  NMR (500 MHz,  $\text{CDCl}_3$ )  $\delta$  7.90 (d,  $J = 8.0$  Hz, 2H), 7.53 (d,  $J = 7.5$  Hz, 2H), 7.42-7.39 (m, 4H), 7.35 (d,  $J = 7.5$  Hz, 1H), 7.32 (d,  $J = 8.0$  Hz, 2H), 6.81 (s, 1H), 6.74 (d,  $J = 8.5$  Hz, 2H), 3.65 (dd,  $J = 15.0, 3.0$  Hz, 1H), 3.33-3.28 (m, 1H), 3.11 (dd,  $J = 11.0, 3.0$  Hz, 1H), 2.50 (s, 3H), 2.26-2.14 (m, 2H), 1.56-1.51 (m, 2H), 0.69 (t,  $J = 7.0$  Hz, 3H);  $^{13}\text{C}\{^1\text{H}\}$  NMR (125 MHz,  $\text{CDCl}_3$ )  $\delta$  144.1, 137.7, 137.47, 137.45, 132.0, 129.9, 129.2, 128.4, 128.1, 127.9, 127.2, 122.2, 86.1, 65.8, 57.9, 47.1, 21.8, 19.4, 11.7; FT-IR (KBr) 2975, 2924, 1485, 1343, 1162, 959, 661  $\text{cm}^{-1}$ ; HRMS (ESI)  $m/z$   $[\text{M}+\text{H}]^+$  calcd for  $\text{C}_{25}\text{H}_{28}\text{BrN}_2\text{O}_3\text{S}$ : 515.0999, found: 515.1000.

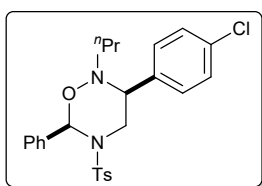

**3-(4-Chlorophenyl)-6-phenyl-2-propyl-5-tosyl-1,2,5-oxadiazinane**

(±)-**4rd**. Analytical TLC on silica gel, 1:15 ethyl acetate/hexane  $R_f = 0.52$ ; colorless solid; mp 119-120 °C; yield 79% (74 mg);  $^1\text{H}$  NMR (400 MHz,  $\text{CDCl}_3$ )  $\delta$  7.90 (d,  $J = 8.4$  Hz, 2H), 7.53 (d,  $J = 8.0$  Hz, 2H), 7.42-7.38 (m, 4H), 7.36-7.32 (m, 1H), 7.17 (d,  $J = 8.4$  Hz, 2H), 6.81-6.78 (m, 3H), 3.67-3.62 (m, 1H), 3.34-3.27 (m, 1H), 3.13 (dd,  $J = 11.2, 3.2$  Hz, 1H), 2.50 (s, 3H), 2.27-2.13 (m, 2H), 1.55-1.49 (m, 2H), 0.69 (t,  $J = 7.2$  Hz, 3H);  $^{13}\text{C}\{^1\text{H}\}$  NMR (125 MHz,  $\text{CDCl}_3$ )  $\delta$  144.1, 137.8, 137.5, 136.9, 134.1, 129.9, 129.0, 128.9, 128.4, 128.1, 128.0, 127.2, 86.1, 65.8, 57.9, 47.2, 21.8, 19.4, 11.7; FT-IR (KBr) 2963, 1490, 1345, 1167, 1017, 971, 704  $\text{cm}^{-1}$ ; HRMS (ESI)  $m/z$   $[\text{M}+\text{H}]^+$  calcd for  $\text{C}_{25}\text{H}_{28}\text{ClN}_2\text{O}_3\text{S}$ : 471.1504, found: 471.1509.

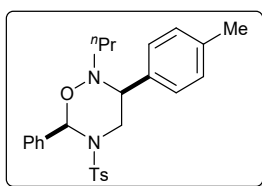

**6-Phenyl-2-propyl-3-(p-tolyl)-5-tosyl-1,2,5-oxadiazinane** (±)-**4re**.

Analytical TLC on silica gel, 1:15 ethyl acetate/hexane  $R_f = 0.53$ ; colorless solid; mp 138-139 °C; yield 77% (69 mg);  $^1\text{H}$  NMR (400 MHz,  $\text{CDCl}_3$ )  $\delta$  7.91 (d,  $J = 8.4$  Hz, 2H), 7.55 (d,  $J = 8.0$  Hz, 2H), 7.42-7.38 (m, 4H), 7.35-7.31 (m, 1H), 6.99 (d,  $J = 7.6$  Hz, 2H), 6.80 (s, 1H), 6.74 (d,  $J = 8.0$  Hz, 2H), 3.67-3.62 (m, 1H), 3.38-3.32 (m, 1H), 3.09 (dd,  $J = 11.2, 3.2$  Hz, 1H), 2.50 (s, 3H), 2.32-2.25 (m, 4H), 2.18-2.12 (m, 1H), 1.54-1.49 (m, 2H), 0.68 (d,  $J = 7.6$  Hz, 3H);  $^{13}\text{C}\{^1\text{H}\}$  NMR (125 MHz,  $\text{CDCl}_3$ )  $\delta$  143.9, 138.1, 137.9, 137.8, 135.4, 129.9, 129.4, 128.4, 128.1, 127.8, 127.5, 127.2, 86.1, 66.2, 57.8, 47.4, 21.8, 21.2, 19.4, 11.7; FT-IR (KBr) 2927, 1345, 1164, 1020, 969, 814, 656  $\text{cm}^{-1}$ ; HRMS (ESI)  $m/z$   $[\text{M}+\text{H}]^+$  calcd for  $\text{C}_{26}\text{H}_{31}\text{N}_2\text{O}_3\text{S}$ : 451.2050, found: 451.2047.

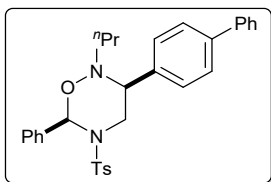

**3-([1,1'-Biphenyl]-4-yl)-6-phenyl-2-propyl-5-tosyl-1,2,5-**

**oxadiazinane (±)-4rf.** Analytical TLC on silica gel, 1:15 ethyl acetate/hexane  $R_f = 0.51$ ; colorless solid; mp 149-150 °C; yield 71% (73 mg);  $^1\text{H}$  NMR (400 MHz,  $\text{CDCl}_3$ )  $\delta$  7.93 (d,  $J = 8.4$  Hz, 2H), 7.57-7.55 (m, 2H), 7.50-7.48 (m, 2H), 7.44-7.37 (m, 8H), 7.35-7.30 (m, 2H), 6.93 (d,  $J = 8.4$  Hz, 2H), 6.84 (s, 1H), 3.37-3.69 (m, 1H), 3.44-3.37 (m, 1H), 3.18 (dd,  $J = 10.8$ , 3.2 Hz, 1H), 2.52 (s, 3H), 2.38-2.31 (m, 1H), 2.24-2.18 (m, 1H), 1.56-1.53 (m, 2H), 0.71 (t,  $J = 7.6$  Hz, 3H);  $^{13}\text{C}\{^1\text{H}\}$  NMR (125 MHz,  $\text{CDCl}_3$ )  $\delta$  144.0, 141.2, 140.5, 137.9, 137.7, 137.4, 129.9, 128.9, 128.4, 128.1, 128.0, 127.9, 127.6, 127.5, 127.2, 127.1, 86.1, 66.2, 57.9, 47.3, 21.8, 19.5, 11.8; FT-IR (KBr) 2927, 1347, 1164, 1019, 971, 695, 569  $\text{cm}^{-1}$ ; HRMS (ESI)  $m/z$   $[\text{M}+\text{H}]^+$  calcd for  $\text{C}_{31}\text{H}_{33}\text{N}_2\text{O}_3\text{S}$ : 513.2206, found: 513.2201.

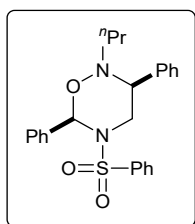

**3,6-Diphenyl-5-(phenylsulfonyl)-2-propyl-1,2,5-oxadiazinane (±)-4ri.**

Analytical TLC on silica gel, 1:15 ethyl acetate/hexane  $R_f = 0.50$ ; colorless solid; mp 119-120 °C; yield 70% (59 mg);  $^1\text{H}$  NMR (400 MHz,  $\text{CDCl}_3$ )  $\delta$  8.05-8.03 (m, 2H), 7.71-7.62 (m, 3H), 7.56-7.54 (m, 2H), 7.43-7.39 (m, 2H), 7.36-7.32 (m, 1H), 7.18-7.17 (m, 3H), 6.84-6.82 (m, 3H), 3.70-3.65 (m, 1H), 3.42-3.36 (m, 1H), 3.04 (dd,  $J = 11.2$ , 3.2 Hz, 1H), 2.30-2.23 (m, 1H), 2.17-2.10 (m, 1H), 1.56-1.49 (m, 2H), 0.68 (t,  $J = 7.2$  Hz, 3H);  $^{13}\text{C}\{^1\text{H}\}$  NMR (150 MHz,  $\text{CDCl}_3$ )  $\delta$  140.8, 138.3, 137.6, 133.2, 129.3, 128.8, 128.4, 128.3, 128.1, 127.9, 127.6, 127.2, 86.2, 66.4, 57.8, 47.4, 19.4, 11.7; FT-IR (KBr) 2924, 1493, 1348, 1167, 1032, 720, 585  $\text{cm}^{-1}$ ; HRMS (ESI)  $m/z$   $[\text{M}+\text{H}]^+$  calcd for  $\text{C}_{24}\text{H}_{27}\text{N}_2\text{O}_3\text{S}$ : 423.1737, found: 423.1735.

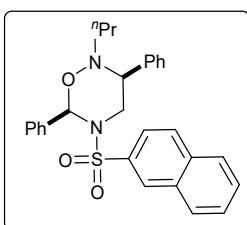

**5-(Naphthalen-2-ylsulfonyl)-3,6-diphenyl-2-propyl-1,2,5-**

**oxadiazinane (±)-4rl.** Analytical TLC on silica gel, 1:15 ethyl acetate/hexane  $R_f = 0.48$ ; colorless solid; mp 129-130 °C; yield 68% (64 mg);  $^1\text{H}$  NMR (500 MHz,  $\text{CDCl}_3$ )  $\delta$  8.58 (s,

1H), 8.10-7.98 (m, 4H), 7.72-7.66 (m, 2H), 7.57 (d,  $J = 8.0$  Hz, 2H), 7.41 (t,  $J = 7.5$  Hz, 2H), 7.36-7.33 (m, 1H), 7.16-7.12 (m, 3H), 6.91 (s, 1H), 6.77 (d,  $J = 7.0$  Hz, 2H), 3.77 (dd,  $J = 15.0, 1.5$  Hz, 1H), 3.44-3.39 (m, 1H), 3.09 (dd,  $J = 11.0, 2.5$  Hz, 1H), 2.24-2.18 (m, 1H), 2.11-2.06 (m, 1H), 1.52-1.45 (m, 2H), 0.63 (t,  $J = 7.5$  Hz, 3H);  $^{13}\text{C}\{^1\text{H}\}$  NMR (125 MHz,  $\text{CDCl}_3$ )  $\delta$  138.3, 137.6, 135.1, 132.4, 129.6, 129.4, 129.3, 129.1, 128.7, 128.4, 128.3, 128.1, 127.9, 127.8, 127.6, 127.2, 123.3, 86.2, 66.6, 57.8, 47.4, 19.4, 11.7; FT-IR (KBr) 2924, 1450, 1340, 1165, 1020, 969, 748, 656  $\text{cm}^{-1}$ ; HRMS (ESI)  $m/z$   $[\text{M}+\text{H}]^+$  calcd for  $\text{C}_{28}\text{H}_{29}\text{N}_2\text{O}_3\text{S}$ : 473.1893, found: 473.1888.

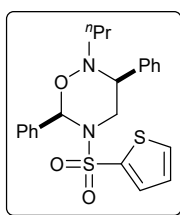

**3,6-Diphenyl-2-propyl-5-(thiophen-2-ylsulfonyl)-1,2,5-oxadiazinane (±)-**

**4rm.** Analytical TLC on silica gel, 1:15 ethyl acetate/hexane  $R_f = 0.49$ ; colorless solid; mp 149-150  $^\circ\text{C}$ ; yield 69% (59 mg);  $^1\text{H}$  NMR (500 MHz,  $\text{CDCl}_3$ )  $\delta$  7.79-7.78 (m, 1H), 7.73-7.72 (m, 1H), 7.57 (d,  $J = 8.0$  Hz, 2H), 7.42 (t,  $J = 7.0$  Hz, 2H), 7.36-7.34 (m, 1H), 7.23-7.19 (m, 4H), 6.92-6.90 (m, 2H), 6.82 (s, 1H), 3.80 (dd,  $J = 14.5, 1.5$  Hz, 1H), 3.46-3.41 (m, 1H), 3.20 (dd,  $J = 11.5, 3.0$  Hz, 1H), 2.35-2.29 (m, 1H), 2.23-2.18 (m, 1H), 1.62-1.57 (m, 2H), 0.70 (t,  $J = 7.0$  Hz, 3H);  $^{13}\text{C}\{^1\text{H}\}$  NMR (125 MHz,  $\text{CDCl}_3$ )  $\delta$  141.5, 138.3, 137.4, 133.1, 132.6, 128.8, 128.4, 128.0, 127.9, 127.6, 127.2, 86.3, 66.6, 57.9, 47.6, 19.4, 11.7; FT-IR (KBr) 2924, 1452, 1353, 1160, 1022, 969, 697, 590  $\text{cm}^{-1}$ ; HRMS (ESI)  $m/z$   $[\text{M}+\text{H}]^+$  calcd for  $\text{C}_{22}\text{H}_{25}\text{N}_2\text{O}_3\text{S}_2$ : 429.1301, found: 429.1305.

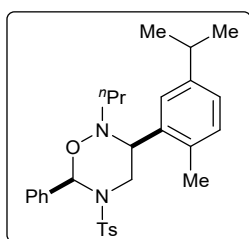

**3-(5-Isopropyl-2-methylphenyl)-6-phenyl-2-propyl-5-tosyl-1,2,5-**

**oxadiazinane (±)-4rr.** Analytical TLC on silica gel, 1:15 ethyl acetate/hexane  $R_f = 0.52$ ; colorless solid; mp 124-125  $^\circ\text{C}$ ; yield 70% (69 mg);  $^1\text{H}$  NMR (400 MHz,  $\text{CDCl}_3$ )  $\delta$  7.93 (d,  $J = 8.0$  Hz, 2H), 7.58 (d,  $J = 7.6$  Hz, 2H), 7.44-7.38 (m, 4H), 7.36-7.33 (m, 1H), 6.96-6.90 (m, 2H), 6.87 (s, 1H), 6.65 (s, 1H), 3.60-3.56 (m, 1H), 3.49-3.46 (m, 1H), 3.36-3.30 (m, 1H), 2.66-2.60 (m, 1H), 2.48 (s, 3H), 2.31-2.19 (m, 2H), 1.96 (s, 3H), 1.68-1.60 (m, 1H), 1.50-1.42 (m, 1H), 1.01 (t,  $J = 7.6$  Hz, 6H), 0.69 (t,  $J = 7.2$  Hz, 3H);  $^{13}\text{C}\{^1\text{H}\}$  NMR (125 MHz,  $\text{CDCl}_3$ )  $\delta$

147.1, 143.9, 137.9, 137.8, 136.5, 132.5, 130.3, 129.8, 128.3, 128.2, 127.8, 127.3, 125.5, 125.1, 86.1, 61.4, 57.4, 46.5, 33.5, 24.1, 23.7, 21.7, 19.5, 18.9, 11.9; FT-IR (KBr) 2960, 2927, 1452, 1345, 1162, 1017, 972, 733, 572  $\text{cm}^{-1}$ ; HRMS (ESI)  $m/z$   $[M+H]^+$  calcd for  $\text{C}_{29}\text{H}_{37}\text{N}_2\text{O}_3\text{S}$ : 493.2519, found: 493.2502.

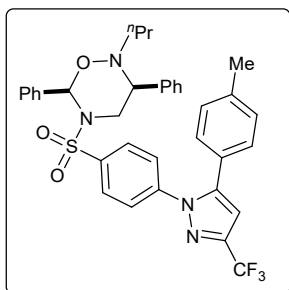

**3,6-Diphenyl-2-propyl-5-((4-(5-(*p*-tolyl)-3-(trifluoromethyl)-1H-pyrazol-1-yl)phenyl)sulfonyl)-1,2,5-oxadiazinane ( $\pm$ )-4rs.** Analytical TLC on silica gel, 1:15 ethyl acetate/hexane  $R_f = 0.46$ ; colorless solid; mp 195-196  $^{\circ}\text{C}$ ; yield 65% (84 mg);  $^1\text{H}$  NMR (500 MHz,  $\text{CDCl}_3$ )  $\delta$  8.01 (d,  $J = 9.0$  Hz, 2H), 7.60 (d,  $J = 9.0$  Hz, 2H), 7.54 (d,  $J = 8.0$  Hz, 2H), 7.42 (t,  $J = 7.5$  Hz, 2H), 7.37-7.34 (m, 1H), 7.21-7.14 (m, 7H), 6.85 (d,  $J = 6.5$  Hz, 2H), 6.80 (s, 1H), 6.77 (s, 1H), 3.71 (dd,  $J = 15.0, 2.5$  Hz, 1H), 3.44-3.39 (m, 1H), 3.18 (dd,  $J = 11.0, 3.0$  Hz, 1H), 2.36 (s, 3H), 2.34-2.29 (m, 1H), 2.22-2.17 (m, 1H), 1.56-1.53 (m, 2H), 0.71 (t,  $J = 7.5$  Hz, 3H);  $^{13}\text{C}$   $\{^1\text{H}\}$  NMR (125 MHz,  $\text{CDCl}_3$ )  $\delta$  145.4, 144.5 (q,  $J_{\text{C-F}} = 38.6$  Hz), 142.8, 140.4, 139.9, 138.1, 137.2, 129.9, 128.98, 128.93, 128.91, 128.5, 128.1, 127.6, 127.1, 126.0, 125.6, 122.2 (q,  $J_{\text{C-F}} = 267.5$  Hz), 106.7, 86.3, 66.7, 57.9, 47.5, 21.4, 19.6, 11.7;  $^{19}\text{F}$  NMR (471 MHz,  $\text{CDCl}_3$ )  $\delta$  -62.409; FT-IR (KBr) 2927, 1470, 1365, 1237, 1165, 1020, 973, 699  $\text{cm}^{-1}$ ; HRMS (ESI)  $m/z$   $[M+H]^+$  calcd for  $\text{C}_{35}\text{H}_{34}\text{F}_3\text{N}_4\text{O}_3\text{S}$ : 647.2298, found: 647.2295.

**Table S2. Effect of Catalysts on Stereospecific Synthesis of Oxadiazines.<sup>a</sup>**

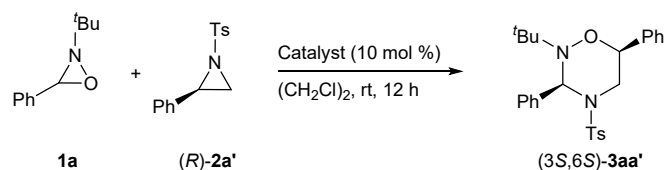

| Entry | Catalyst (10 mol %)       | Yield ( <b>3aa'</b> , (%)) <sup>b</sup> | ee (%) <sup>c</sup> |
|-------|---------------------------|-----------------------------------------|---------------------|
| 1     | $\text{Cu}(\text{OTf})_2$ | 64                                      | 9                   |
| 2     | $\text{Ni}(\text{OTf})_2$ | 48                                      | 19                  |
| 3     | $\text{Zn}(\text{OTf})_2$ | 52                                      | 20                  |
| 4     | $\text{Yb}(\text{OTf})_3$ | 58                                      | 17                  |
| 5     | $\text{AgNTf}_2$          | 80                                      | 94                  |
| 6     | $\text{AgOTf}$            | 72                                      | 94                  |
| 7     | $\text{AgBF}_4$           | 54                                      | 94                  |

<sup>a</sup>Reaction conditions: **1a** (0.2 mmol), (*R*)-**2a'** (0.2 mmol), catalyst (10 mol %), (CH<sub>2</sub>Cl)<sub>2</sub> (2 mL), room temperature, 12 h. <sup>b</sup>Yield of the isolated product. <sup>c</sup>ee assigned by HPLC analysis.

## HPLC Chromatograms

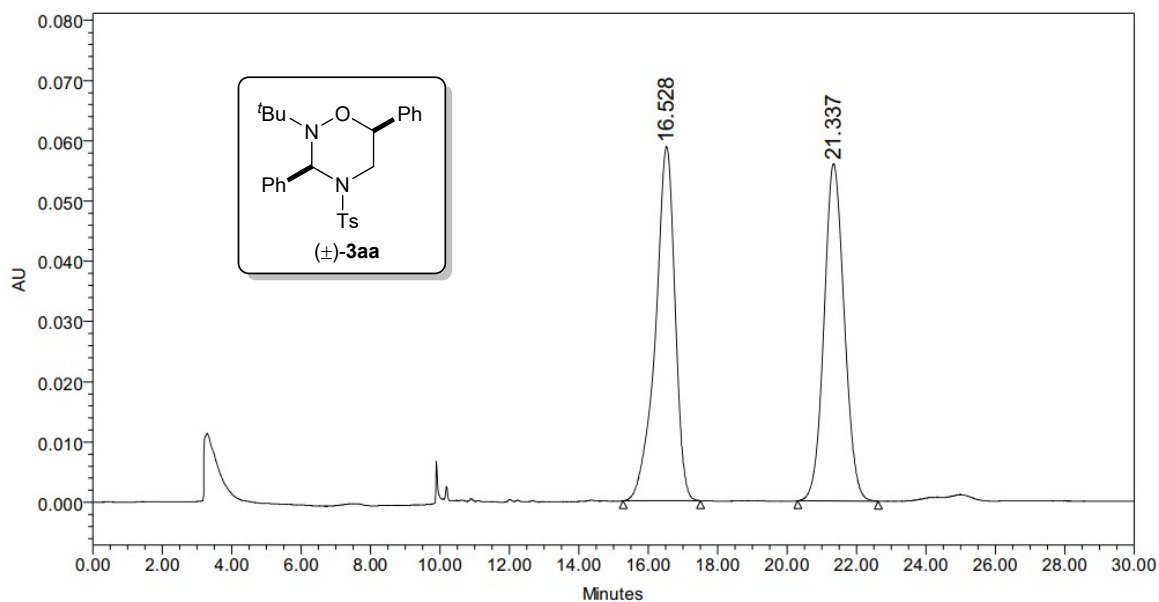

|   | RT     | Area    | % Area | Height |
|---|--------|---------|--------|--------|
| 1 | 16.528 | 2283323 | 50.36  | 58808  |
| 2 | 21.337 | 2250846 | 49.64  | 56028  |

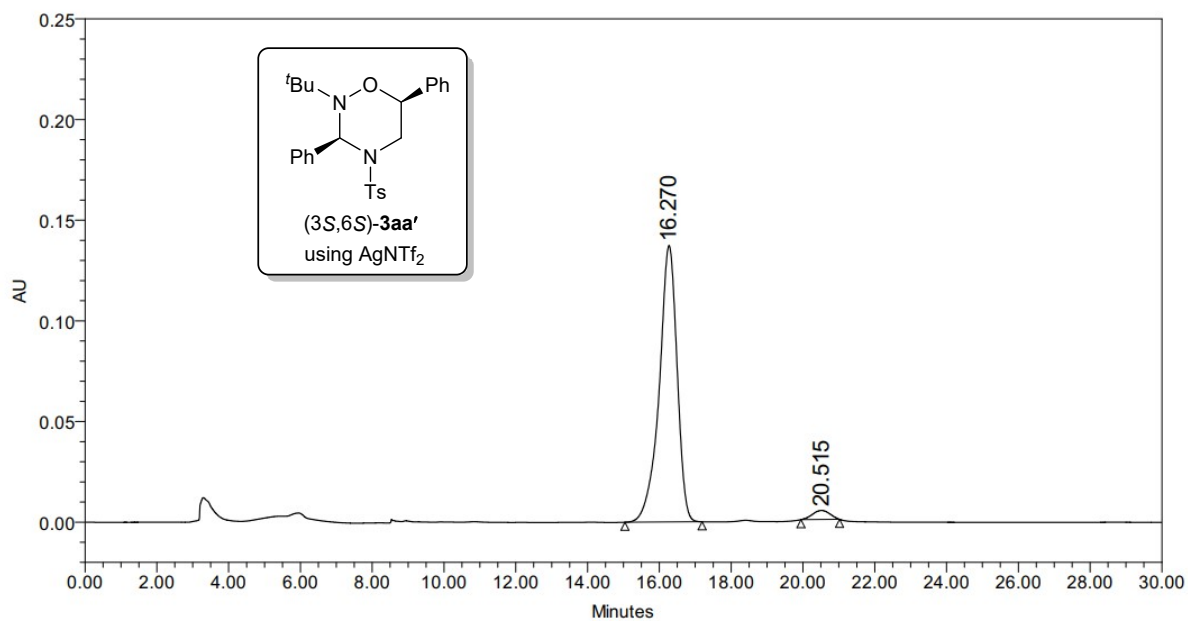

|   | RT     | Area    | % Area | Height |
|---|--------|---------|--------|--------|
| 1 | 16.270 | 4757767 | 96.92  | 137350 |
| 2 | 20.515 | 151218  | 3.08   | 4496   |

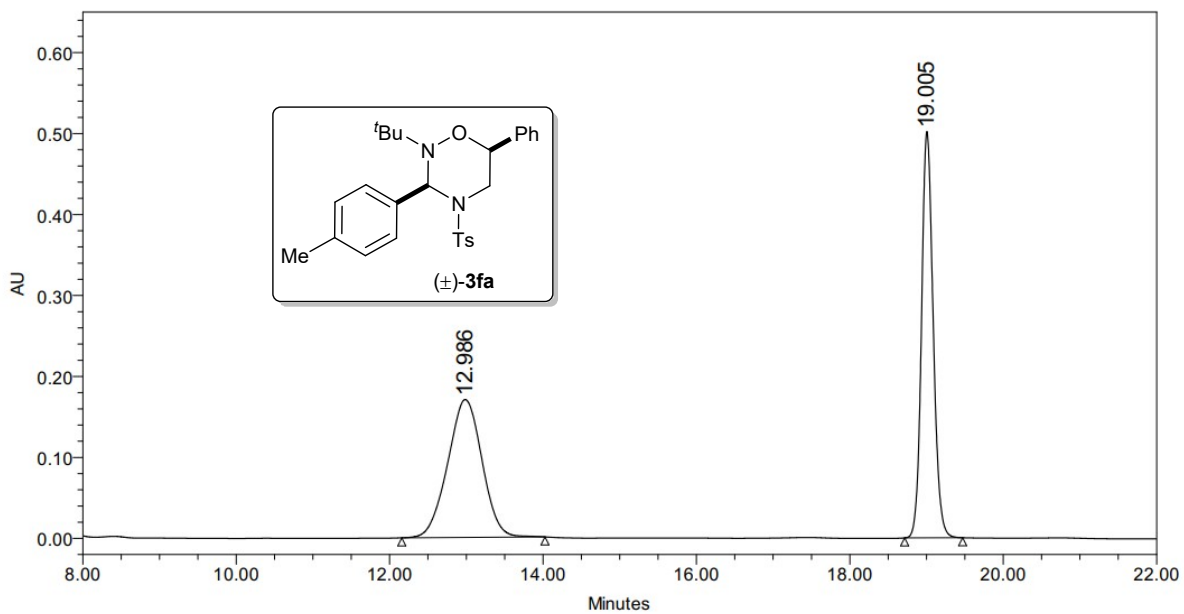

|   | RT     | Area    | % Area | Height |
|---|--------|---------|--------|--------|
| 1 | 12.986 | 5301573 | 50.02  | 170333 |
| 2 | 19.005 | 5297004 | 49.98  | 501763 |

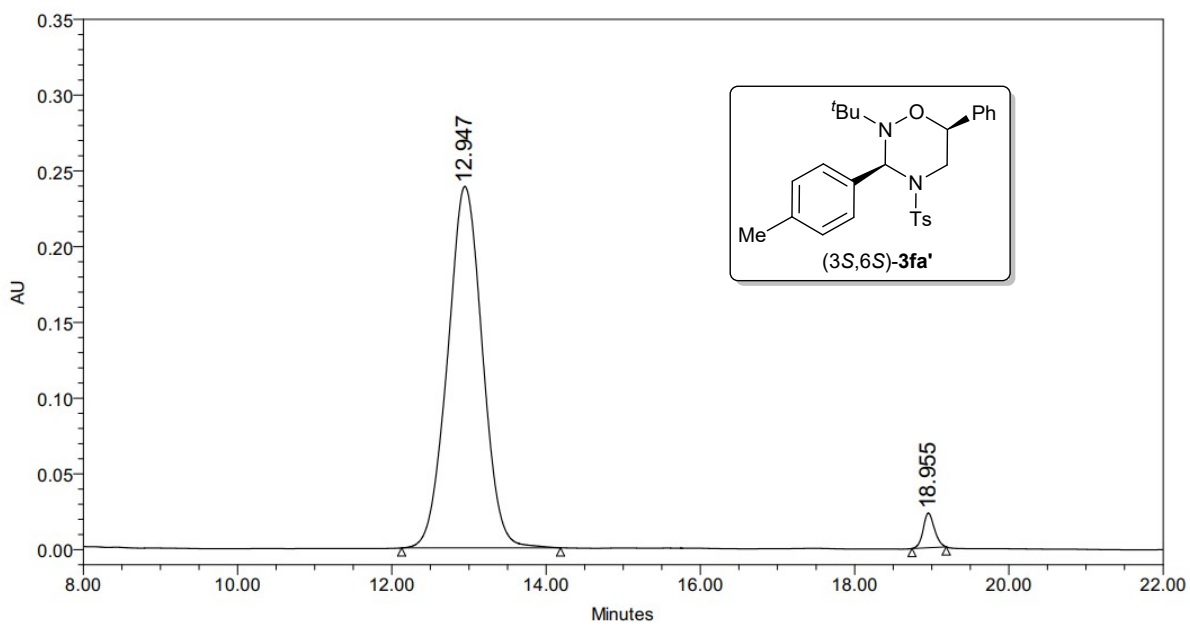

|   | RT     | Area    | % Area | Height |
|---|--------|---------|--------|--------|
| 1 | 12.947 | 7458812 | 96.98  | 238617 |
| 2 | 18.955 | 232301  | 3.02   | 22886  |

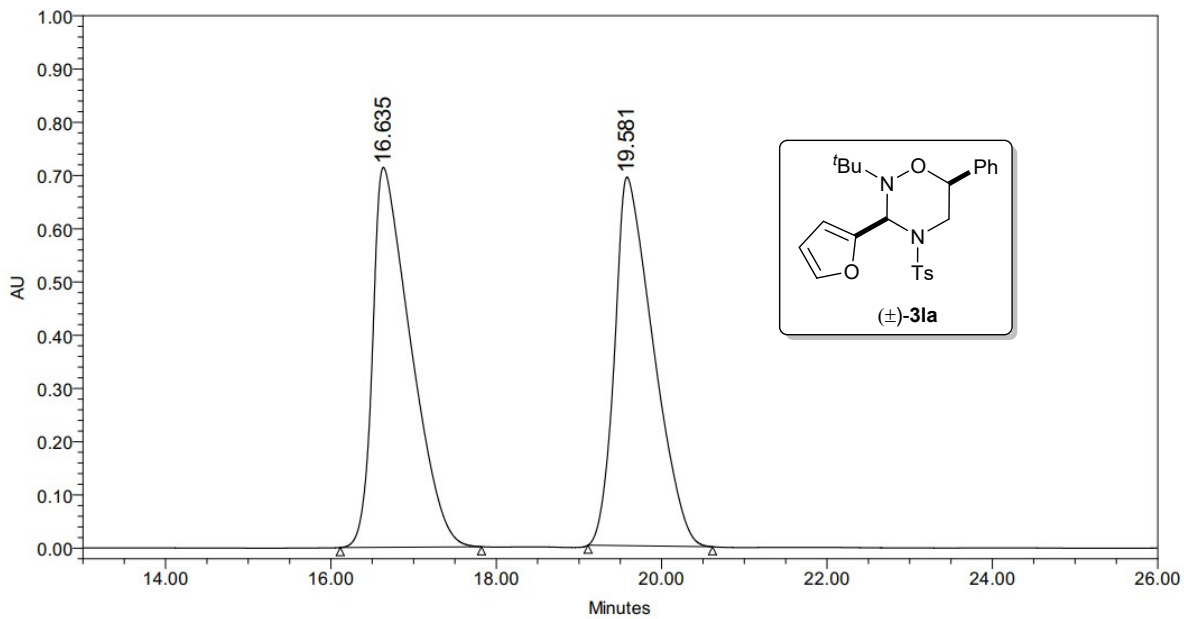

|   | RT     | Area     | % Area | Height |
|---|--------|----------|--------|--------|
| 1 | 16.635 | 22774044 | 50.34  | 713491 |
| 2 | 19.581 | 22470876 | 49.66  | 692300 |

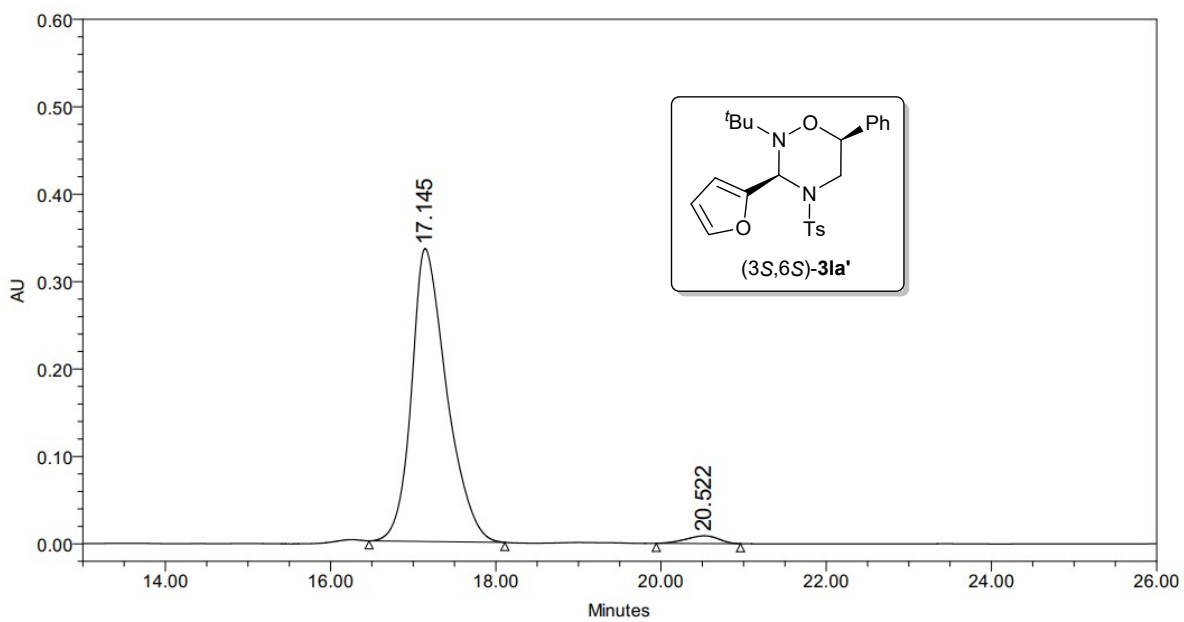

|   | RT     | Area    | % Area | Height |
|---|--------|---------|--------|--------|
| 1 | 17.145 | 9926375 | 97.63  | 335037 |
| 2 | 20.522 | 240870  | 2.37   | 8775   |

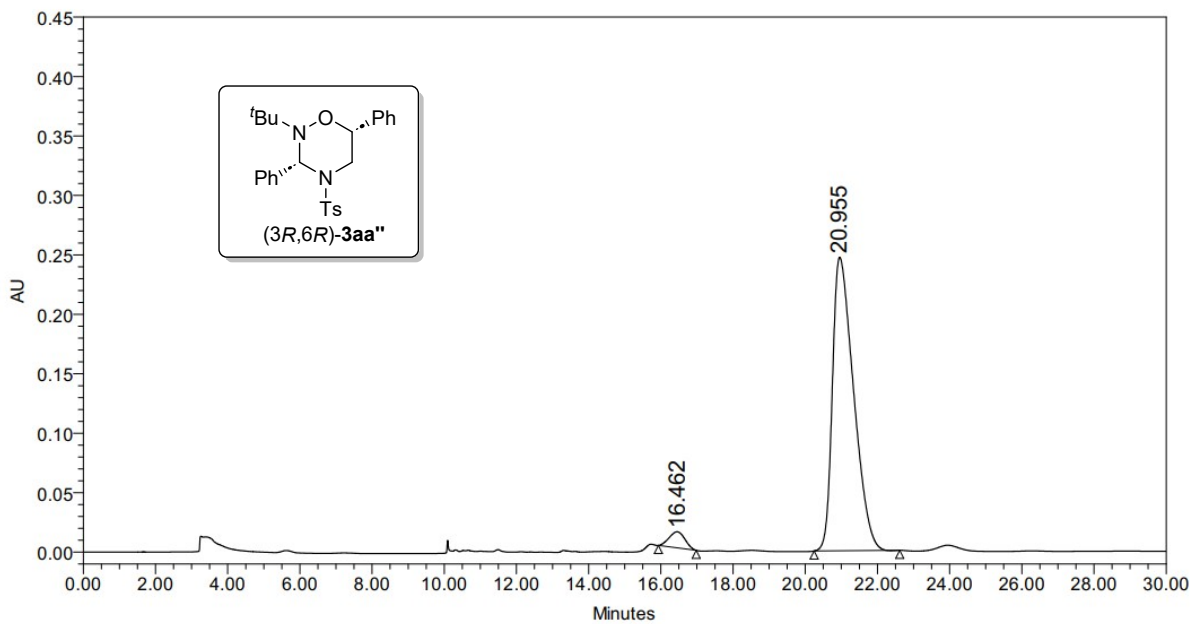

|   | RT     | Area     | % Area | Height |
|---|--------|----------|--------|--------|
| 1 | 16.462 | 411949   | 3.94   | 13569  |
| 2 | 20.955 | 10054895 | 96.06  | 246925 |

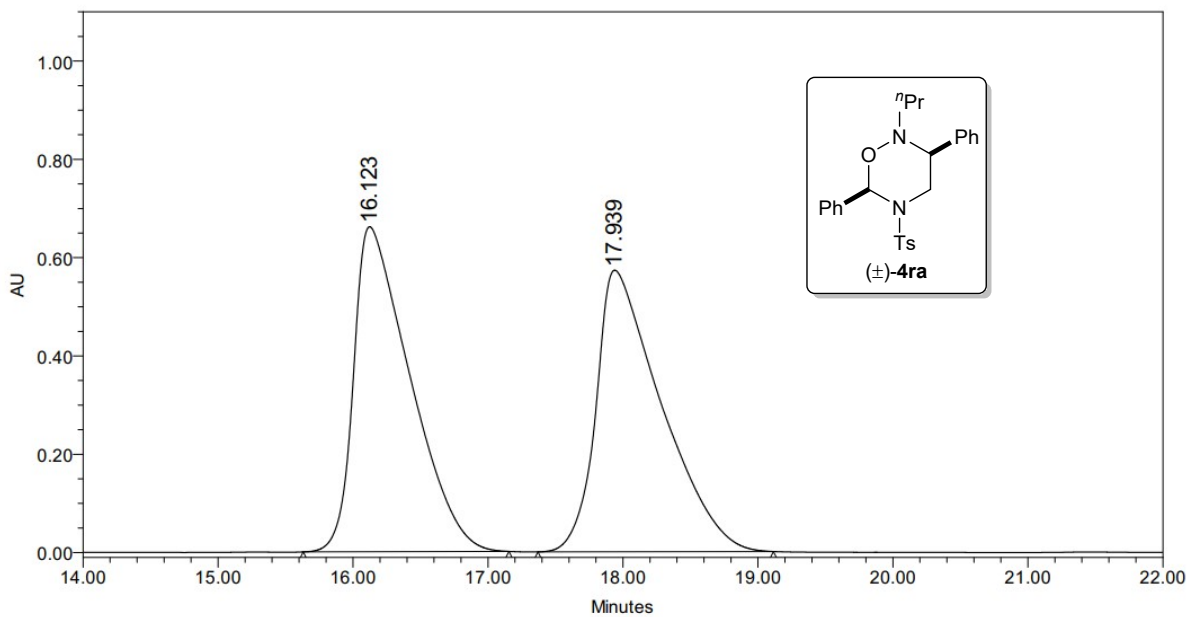

|   | RT     | Area     | % Area | Height |
|---|--------|----------|--------|--------|
| 1 | 16.123 | 19201900 | 49.95  | 661326 |
| 2 | 17.939 | 19241134 | 50.05  | 572813 |

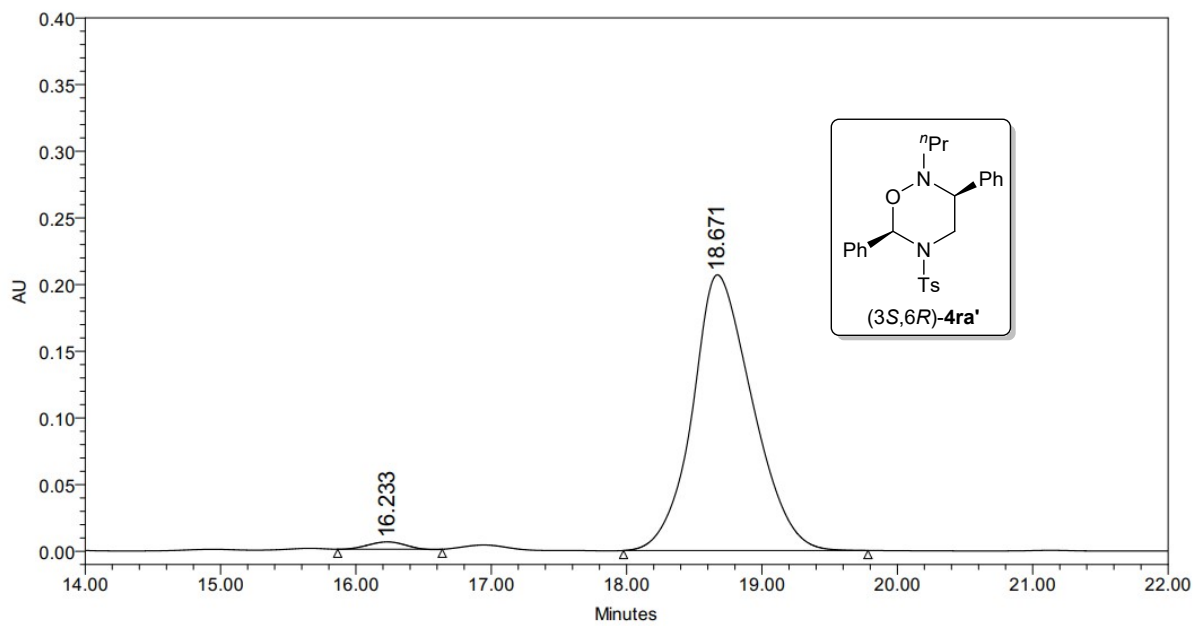

|   | RT     | Area    | % Area | Height |
|---|--------|---------|--------|--------|
| 1 | 16.233 | 104334  | 1.61   | 5529   |
| 2 | 18.671 | 6374938 | 98.39  | 206772 |

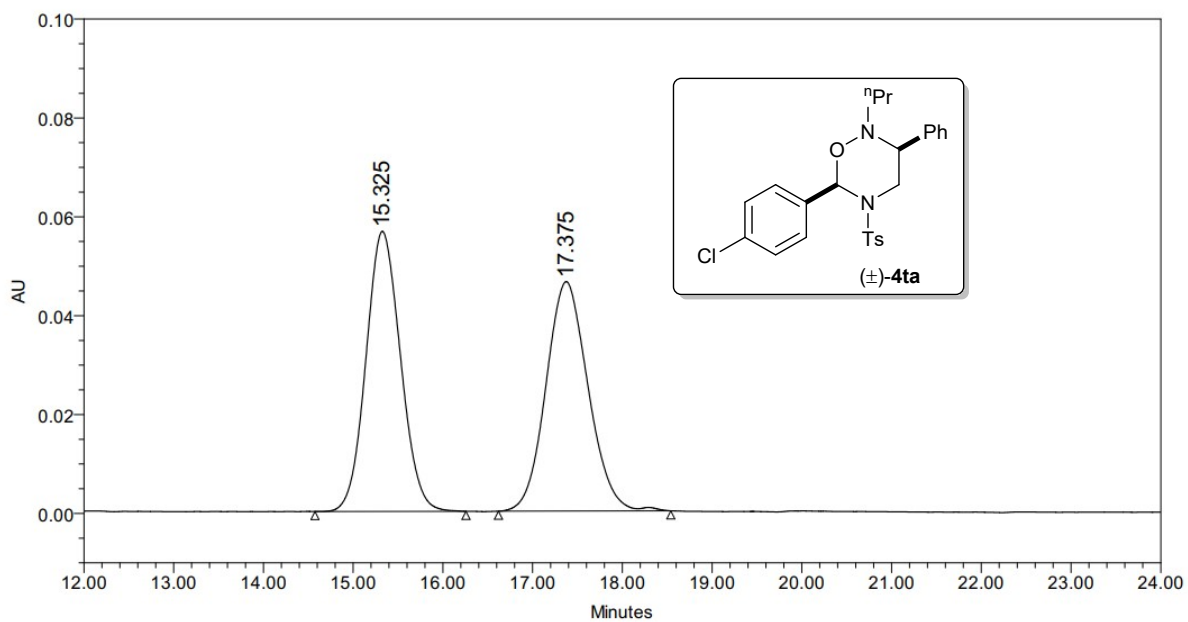

|   | RT     | Area    | % Area | Height |
|---|--------|---------|--------|--------|
| 1 | 15.325 | 1515891 | 50.03  | 56660  |
| 2 | 17.375 | 1514349 | 49.97  | 46419  |

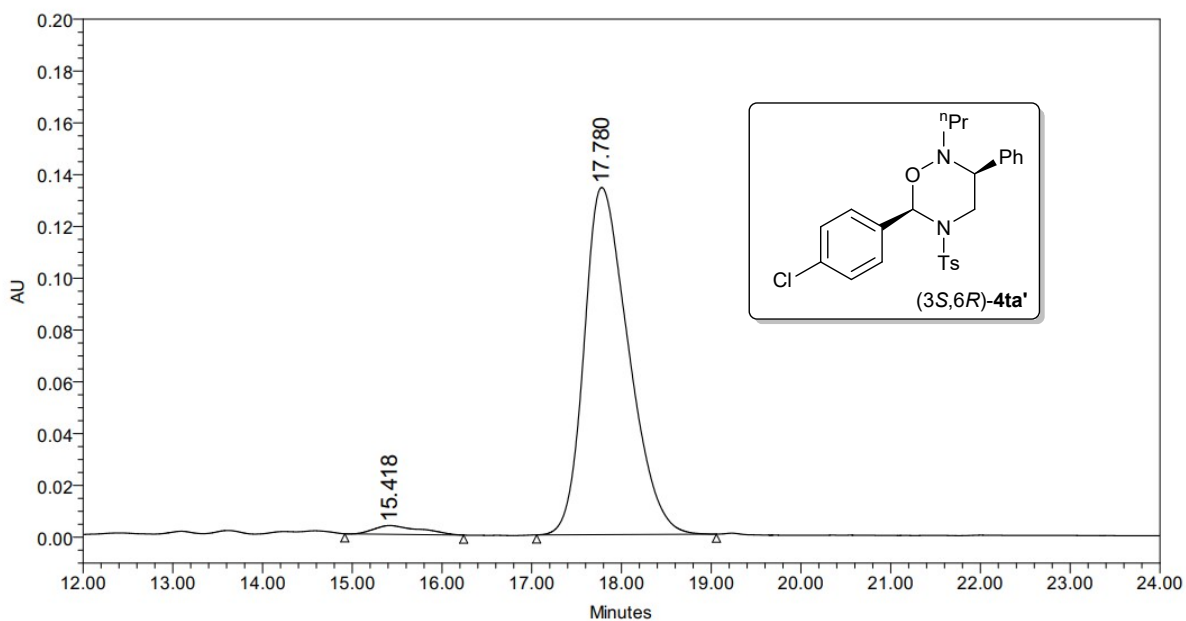

|   | RT     | Area    | % Area | Height |
|---|--------|---------|--------|--------|
| 1 | 15.418 | 122067  | 2.58   | 3383   |
| 2 | 17.780 | 4601233 | 97.42  | 134022 |

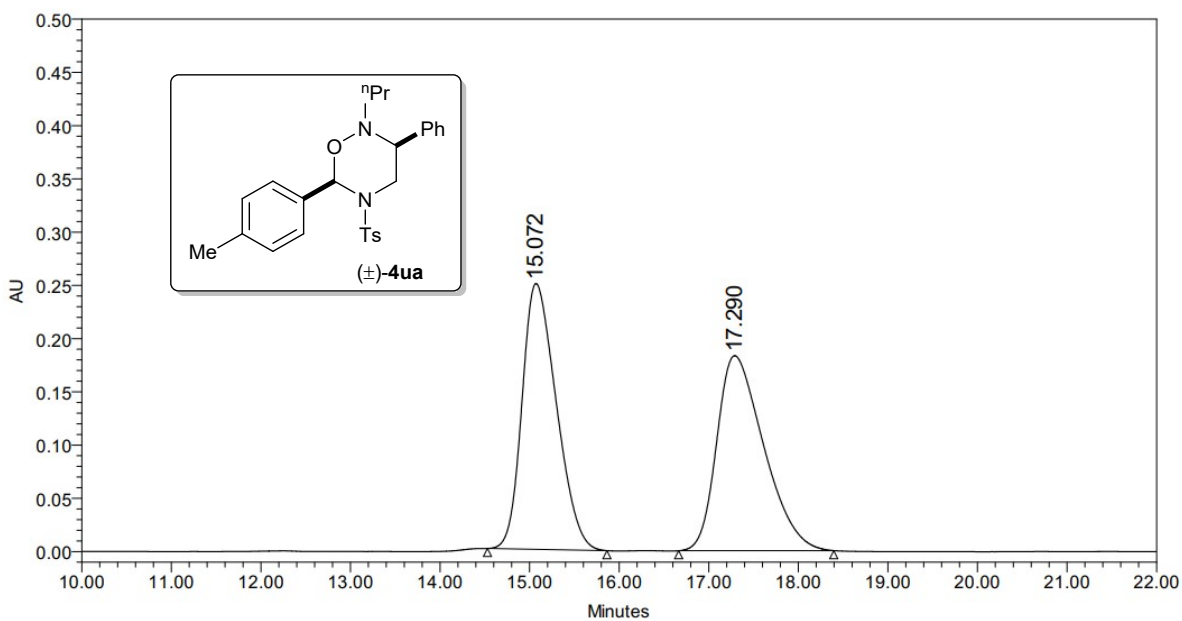

|   | RT     | Area    | % Area | Height |
|---|--------|---------|--------|--------|
| 1 | 15.072 | 6638380 | 49.92  | 249692 |
| 2 | 17.290 | 6658336 | 50.08  | 183131 |

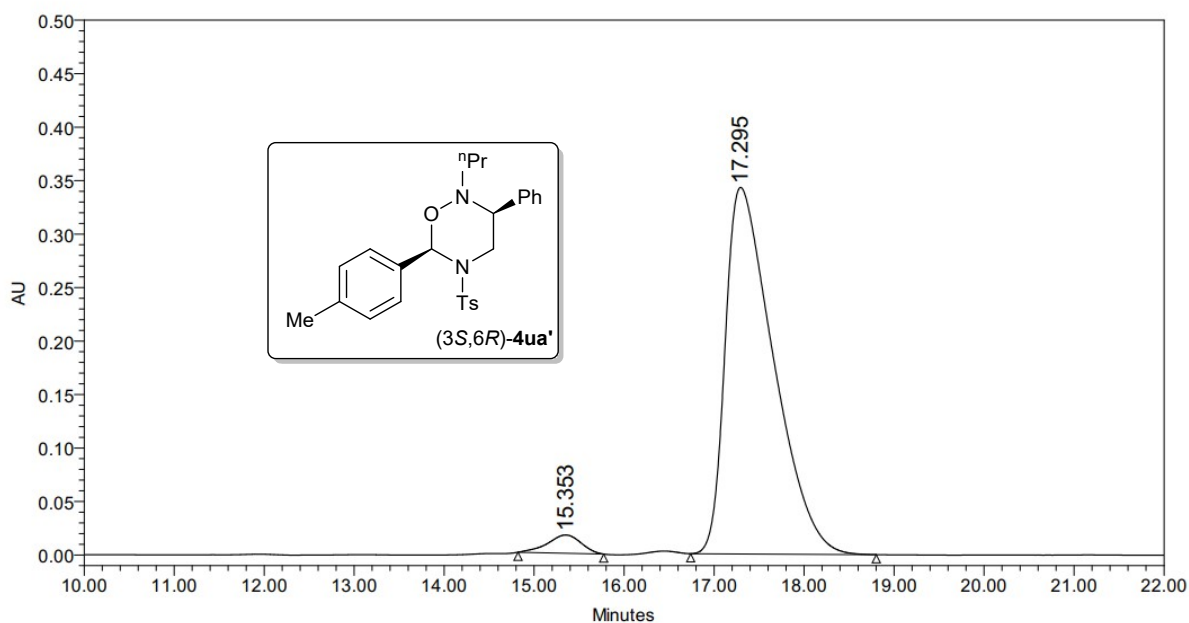

|   | RT     | Area     | % Area | Height |
|---|--------|----------|--------|--------|
| 1 | 15.353 | 440053   | 3.34   | 17070  |
| 2 | 17.295 | 12752831 | 96.66  | 342679 |

## Scheme S5. Mechanistic Studies

### a) Radical scavenger experiments

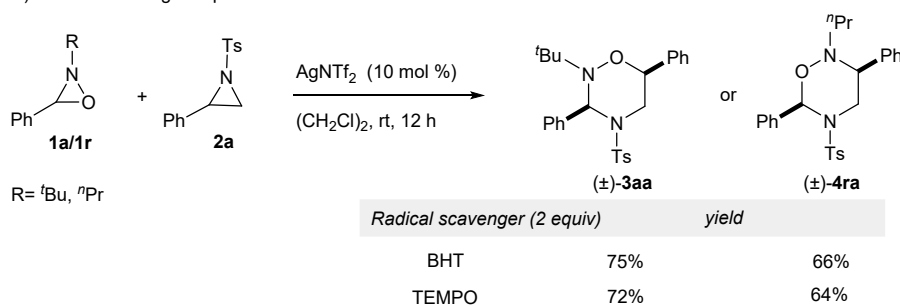

### b) Control experiment

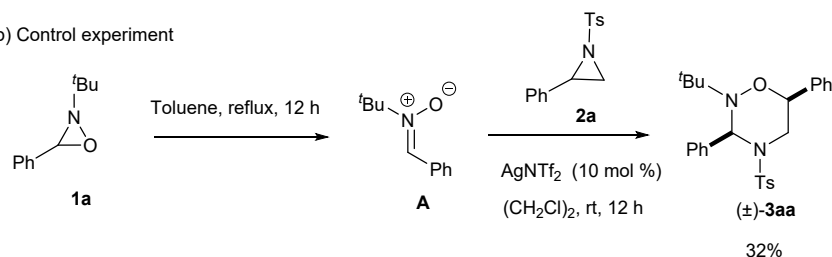

**Radical Scavenger Experiments (Scheme S5a).** Substrate 1a/1r (0.2 mmol, 1 equiv), 2a (54.6 mg, 0.2 mmol, 1 equiv), AgNTf<sub>2</sub> (7.7 mg, 0.02 mmol, 0.1 equiv) and TEMPO/BHT (0.4 mmol, 2 equiv) were stirred in (CH<sub>2</sub>Cl)<sub>2</sub> (2 mL, 0.1 M) at room temperature for 12 h. After completion (monitored by TLC), the reaction mixture was diluted with CH<sub>2</sub>Cl<sub>2</sub> (5 mL) and passed through a short pad of celite using CH<sub>2</sub>Cl<sub>2</sub> (10 mL). Evaporation of the solvent gave a residue that was

purified on silica gel column chromatography using ethyl acetate and hexane as eluent to afford ( $\pm$ )-**3aa**/ $(\pm)$ -**4ra**.

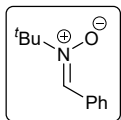

**Preparation of (*Z*)-*N*-*tert*-Butyl-1-phenylmethanimine oxide **A**.**<sup>3</sup> 2-(*tert*-Butyl)-3-phenyl-1,2-oxaziridine **1a** (177 mg, 1 mmol, 1 equiv) was stirred in toluene (10 mL, 1.0 M) under reflux for 12 h air. The resultant reaction mixture was cooled to room temperature and the solvent was evaporated to give nitrone **A** in 95% yield (168 mg). Colourless solid; <sup>1</sup>H NMR (400 MHz, CDCl<sub>3</sub>)  $\delta$  8.29-8.27 (m, 2H), 7.54 (s, 1H), 7.44-7.38 (m, 3H), 1.61 (s, 9H).

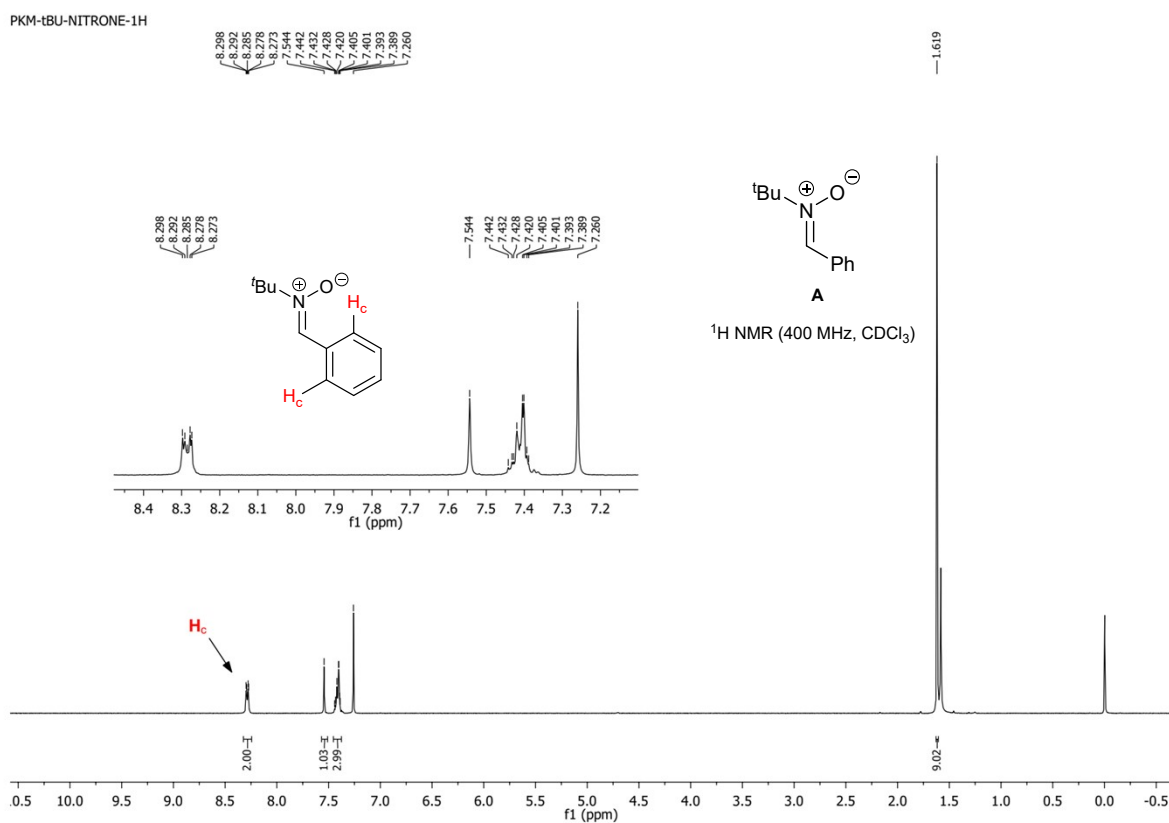

**Control Experiment Scheme S5b.** The nitrone **A** (0.2 mmol, 35 mg), aziridine **2a** (0.2 mmol, 54 mg) and AgNTf<sub>2</sub> (10 mol %, 7.7 mg) were stirred in (CH<sub>2</sub>Cl)<sub>2</sub> (2 mL) at room temperature under nitrogen atmosphere 12 h. The reaction mixture was diluted with CH<sub>2</sub>Cl<sub>2</sub> (5 mL) and passed through a short pad of celite using CH<sub>2</sub>Cl<sub>2</sub> (10 mL). Evaporation of the solvent gave a residue which was purified using ethyl acetate and hexane as eluent to give ( $\pm$ )-**3aa** in 32% yield (29 mg).

**Scale-up Synthesis of (±)-3ea.** Substrate **1e** (765 mg, 3 mmol, 1.0 equiv), **2a** (819 mg, 3 mmol, 1.0 equiv) and AgNTf<sub>2</sub> (116.3 mg, 0.3 mmol, 0.1 equiv) were stirred in (CH<sub>2</sub>Cl)<sub>2</sub> (30 mL, 0.1 M) at room temperature for 12 h. After completion (monitored by TLC), the reaction mixture was diluted with CH<sub>2</sub>Cl<sub>2</sub> (20 mL) and passed through a short pad of celite using CH<sub>2</sub>Cl<sub>2</sub> (50 mL). Evaporation of the solvent gave a residue that was purified on silica gel column chromatography using ethyl acetate and hexane as an eluent to yield (±)-**3ea** in 68% yield (1.07 g).

**Scale-up Synthesis of (±)-4rc.** Substrate **1r** (489 mg, 3 mmol, 1.0 equiv), **2c** (1.05 g, 3 mmol, 1.0 equiv) and AgNTf<sub>2</sub> (116.3 mg, 0.3 mmol, 0.1 equiv) were stirred in (CH<sub>2</sub>Cl)<sub>2</sub> (30 mL, 0.1 M) at room temperature for 12 h. After completion (monitored by TLC), the reaction mixture was diluted with CH<sub>2</sub>Cl<sub>2</sub> (20 mL) and passed through a short pad of celite using CH<sub>2</sub>Cl<sub>2</sub> (50 mL). Evaporation of the solvent gave a residue that was purified on silica gel column chromatography using ethyl acetate and hexane as an eluent to yield (±)-**4rc** in 66% yield (1.01 g).

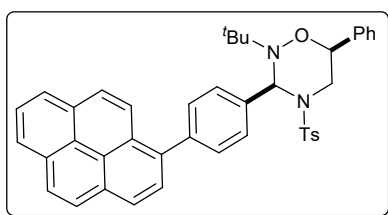

**2-(tert-Butyl)-6-phenyl-3-(4-(pyren-1-yl)phenyl)-4-tosyl-**

**1,2,4-oxadiazinane (±)-5.** In a pressure tube, a mixture of compound (±)-**3ea** (52 mg, 0.1 mmol, 1.0 equiv), pyrene-1-boronic acid (25 mg, 0.1 mmol, 1.0 equiv), Pd(PPh<sub>3</sub>)<sub>4</sub> (3.5 mg, 0.003 mmol, 0.03 equiv), Na<sub>2</sub>CO<sub>3</sub> (11 mg, 0.1 mmol, 1.0 equiv) and H<sub>2</sub>O (25 μL) in toluene: EtOH (1:1, 1 mL) was stirred at 100 °C in an oil bath for 12 h under argon atmosphere. After completion, the reaction mixture was cooled to room temperature and passed through a short pad of celite using CH<sub>2</sub>Cl<sub>2</sub> (10 mL). Evaporation of the solvent gave a residue that was purified on silica gel column chromatography to give (±)-**5** in 82% yield (53 mg). Analytical TLC on silica gel, 1:9 ethyl acetate/hexane R<sub>f</sub> = 0.40; brown solid; mp 193-194 °C; yield 82% (53 mg); <sup>1</sup>H NMR (400 MHz, CDCl<sub>3</sub>) δ 8.24-8.15 (m, 4H), 8.13-8.07 (m, 3H), 8.06-8.00 (m, 2H), 7.96-7.91 (m, 3H), 7.70 (d, *J* = 8.0 Hz, 2H), 7.57 (d, *J* = 8.0 Hz, 2H), 7.43-7.33 (m, 5H), 7.24 (s, 1H), 6.20 (s, 1H), 4.84 (dd, *J* = 10.8, 2.8 Hz, 1H), 3.97 (dd, *J* = 14.0, 3.6 Hz, 1H), 3.57-3.50 (m, 1H), 2.40 (s, 3H), 1.11 (s, 9H); <sup>13</sup>C {<sup>1</sup>H} NMR (125 MHz, CDCl<sub>3</sub>) δ 143.4, 141.2, 138.2, 137.8, 137.3, 137.2, 131.6, 131.1, 130.8, 130.6, 129.7, 129.4, 128.8, 128.5, 128.4, 127.8, 127.7, 127.6, 127.5, 126.2, 125.8, 125.3, 125.2, 125.1, 125.0, 124.8, 78.6, 72.2, 58.5, 45.7, 26.9, 21.7;

FT-IR (KBr) 2967, 2926, 1595, 1344, 1161, 960, 845, 660  $\text{cm}^{-1}$ ; HRMS (ESI)  $m/z$   $[\text{M}+\text{H}]^+$  calcd for  $\text{C}_{42}\text{H}_{39}\text{N}_2\text{O}_3\text{S}$ : 651.2676, found: 651.2677.

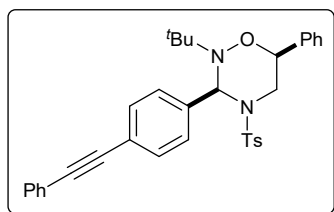

**2-(*tert*-Butyl)-6-phenyl-3-(4-(phenylethynyl)phenyl)-4-tosyl-**

**1,2,4-oxadiazinane ( $\pm$ )-6.**<sup>4</sup> In a pressure tube, a mixture of ( $\pm$ )-**3ea** (52 mg, 0.1 mmol, 1 equiv), phenylacetylene (20.4 mg, 0.1 mmol, 2 equiv),  $\text{PdCl}_2(\text{PPh}_3)_2$  (7 mg, 0.01 mmol, 0.1 equiv),  $\text{CuI}$  (1.9 mg, 0.01 mmol, 0.1 equiv) and  $\text{Et}_3\text{N}$  (70  $\mu\text{L}$ , 0.5 mmol, 5 equiv) in DMF (1 mL) was stirred at 60  $^\circ\text{C}$  in an oil bath for 30 h under argon atmosphere. After completion, the resulting mixture was quenched with  $\text{H}_2\text{O}$  and extracted with  $\text{EtOAc}$  (3 x 10 mL). The combined organic layer was washed with brine (2 x 5 mL) and water (1 x 5 mL). Drying ( $\text{Na}_2\text{SO}_4$ ) and evaporation of the solvent gave a residue that was purified on silica gel column chromatography using ethyl acetate/hexane as an eluent to afford ( $\pm$ )-**6** in 85% (47 mg) yield. Analytical TLC on silica gel, 1:9 ethyl acetate/hexane  $R_f$  = 0.42; orange solid; mp 190-191  $^\circ\text{C}$ ; yield 85% (47 mg);  $^1\text{H}$  NMR (500 MHz,  $\text{CDCl}_3$ )  $\delta$  7.73 (d,  $J$  = 8.0 Hz, 2H), 7.63 (d,  $J$  = 8.0 Hz, 2H), 7.54-7.53 (m, 2H), 7.47 (d,  $J$  = 8.0 Hz, 2H), 7.42-7.35 (m, 6H), 7.31 (d,  $J$  = 7.5 Hz, 2H), 7.23 (d,  $J$  = 8.0 Hz, 2H), 6.07 (s, 1H), 4.75 (dd,  $J$  = 11.5, 3.5 Hz, 1H), 3.86 (dd,  $J$  = 14.5, 3.5 Hz, 1H), 3.38 (t,  $J$  = 12.5 Hz, 1H), 2.40 (s, 3H), 1.01 (s, 9H);  $^{13}\text{C}\{^1\text{H}\}$  NMR (125 MHz,  $\text{CDCl}_3$ )  $\delta$  143.5, 139.0, 138.0, 137.2, 131.7, 131.6, 129.6, 129.4, 128.8, 128.5, 128.4, 127.6, 125.8, 123.3, 123.2, 90.2, 89.0, 78.6, 71.8, 58.3, 45.5, 26.8, 21.6; FT-IR (KBr) 2926, 1496, 1344, 1263, 1162, 1031, 952, 758, 662  $\text{cm}^{-1}$ ; HRMS (ESI)  $m/z$   $[\text{M}+\text{H}]^+$  calcd for  $\text{C}_{34}\text{H}_{35}\text{N}_2\text{O}_3\text{S}$ : 551.2363, found: 551.2347.

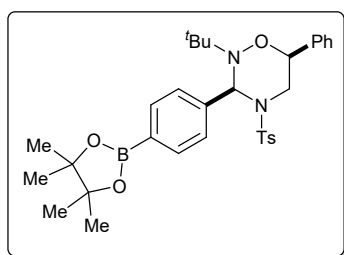

**2-(*tert*-Butyl)-6-phenyl-3-(4-(4,4,5,5-tetramethyl-1,3,2-**

**dioxaborolan-2-yl)phenyl)-4-tosyl-1,2,4-oxadiazinane ( $\pm$ )-7.**<sup>4</sup> In a pressure tube, a mixture of ( $\pm$ )-**3ea** (52 mg, 0.1 mmol, 1.0 equiv), bis(pinacolato)diboron (25 mg, 0.1 mmol, 1.0 equiv),  $\text{KOAc}$  (20 mg, 0.2 mmol, 2.0 equiv) and  $\text{Pd}(\text{dppf})\text{Cl}_2 \cdot \text{CH}_2\text{Cl}_2$  (4 mg, 0.005 mmol, 0.05 equiv) in THF (2 mL) was stirred at 100  $^\circ\text{C}$  in an oil bath for 4 h under  $\text{N}_2$  atmosphere. After completion, the reaction mixture was cooled to room temperature and passed through a short

pad of celite using CH<sub>2</sub>Cl<sub>2</sub> (15 ml). Evaporation of the solvent gave a residue that was purified on silica gel column chromatography using hexane and ethyl acetate as an eluent to give (±)-**7** in 72% yield (42 mg). Analytical TLC on silica gel, 1:9 ethyl acetate/hexane R<sub>f</sub> = 0.45; colorless solid; mp 198-199 °C; yield 72% (42 mg); <sup>1</sup>H NMR (500 MHz, CDCl<sub>3</sub>) δ 7.75-7.71 (m, 4H), 7.60 (d, *J* = 8.0 Hz, 2H), 7.39-7.33 (m, 3H), 7.30-7.28 (m, 2H), 7.18 (d, *J* = 8.0 Hz, 2H), 6.06 (s, 1H), 4.73 (dd, *J* = 11.5, 3.0 Hz, 1H), 3.81-3.78 (m, 1H), 3.37 (t, *J* = 12.0 Hz, 1H), 2.37 (s, 3H), 1.34 (s, 12H), 0.98 (s, 9H); <sup>13</sup>C{<sup>1</sup>H} NMR (125 MHz, CDCl<sub>3</sub>) δ 143.2, 141.8, 138.2, 137.3, 134.8, 129.4, 129.0, 128.7, 128.4, 127.6, 125.9, 83.9, 78.7, 72.1, 58.3, 45.6, 26.8, 25.0, 24.9, 21.6; FT-IR (KBr) 2924, 1360, 1162, 1094, 961, 662, 544 cm<sup>-1</sup>; HRMS (ESI) *m/z* [M+H]<sup>+</sup> calcd for C<sub>32</sub>H<sub>42</sub>BN<sub>2</sub>O<sub>5</sub>S: 577.2902, found: 577.2887.

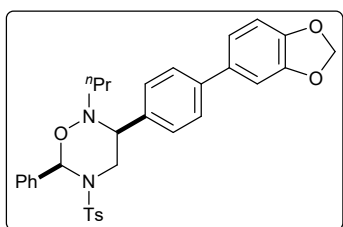

**3-(4-(Benzo[d][1,3]dioxol-5-yl)phenyl)-6-phenyl-2-propyl-5-**

**tosyl-1,2,5-oxadiazinane (±)-8**. In a pressure tube, a mixture of (±)-**4rc** (51 mg, 0.1 mmol, 1.0 equiv), benzo[d][1,3]dioxol-5-ylboronic acid (16.6 mg, 0.1 mmol, 1.0 equiv), Pd(PPh<sub>3</sub>)<sub>4</sub> (3.5 mg, 0.003 mmol, 0.03 equiv), Na<sub>2</sub>CO<sub>3</sub> (11 mg, 0.1 mmol, 1.0 equiv) and H<sub>2</sub>O (25 μL) in toluene: EtOH (1:1, 1 mL) was stirred at 100 °C in an oil bath for 12 h under N<sub>2</sub> atmosphere. After completion, the reaction mixture was cooled to room temperature and passed through a short pad of celite using CH<sub>2</sub>Cl<sub>2</sub> (10 mL). Evaporation of the solvent gave a residue that was purified on silica gel column chromatography to give (±)-**8** in 89% yield (50 mg). Analytical TLC on silica gel, 1:9 ethyl acetate/hexane R<sub>f</sub> = 0.51; colorless solid; mp 156-157 °C; yield 89% (50 mg); <sup>1</sup>H NMR (500 MHz, CDCl<sub>3</sub>) δ 7.92 (d, *J* = 8.5 Hz, 2H), 7.56 (d, *J* = 8.5 Hz, 2H), 7.43-7.40 (m, 4H), 7.36-7.31 (m, 3H), 6.96-6.94 (m, 2H), 6.89 (d, *J* = 8.5 Hz, 2H), 6.84-6.83 (m, 2H), 5.97 (s, 2H), 3.71-3.67 (m, 1H), 3.42-3.36 (m, 1H), 3.17-3.14 (m, 1H), 2.51 (s, 3H), 2.36-2.30 (m, 1H), 2.22-2.17 (m, 1H), 1.60-1.53 (m, 2H), 0.70 (t, *J* = 7.5 Hz, 3H); <sup>13</sup>C{<sup>1</sup>H} NMR (125 MHz, CDCl<sub>3</sub>) δ 148.1, 147.2, 143.9, 140.8, 137.7, 137.5, 136.9, 134.7, 129.8, 128.3, 128.0, 127.8, 127.7, 127.1, 127.0, 120.5, 108.6, 107.4, 101.1, 86.0, 66.0, 57.7, 47.2, 21.6, 19.3, 11.6; FT-IR (KBr) 2962, 2927, 1480, 1345, 1226, 1038, 806, 740 cm<sup>-1</sup>; HRMS (ESI) *m/z* [M+H]<sup>+</sup> calcd for C<sub>32</sub>H<sub>33</sub>N<sub>2</sub>O<sub>5</sub>S: 557.2105, found: 557.2112.

## References

- (a) A. Kivrak and R. C. Larock, *J. Org. Chem.*, 2010, **75**, 7381; (b) J. Kraïem, D. Ghedira and T. Ollevier, *Green Chem.*, 2016, **18**, 4859. (c) G. S. Jang, J. Lee, J. Seo and S. K. Woo, *Org. Lett.*, 2017, **19**, 6448.
- (a) Y. Du, Y. Wu, A.-H. Liu and L.-N. He, *J. Org. Chem.*, 2008, **73**, 4709; (b) C. -Y. Huang and A. G. Doyle, *J. Am. Chem. Soc.*, 2012, **134**, 9541; (c) R. Li, B. Li, H. Zhang, C.-W. Ju, Y. Qin, X.-S. Xue and D. Zhao, *Nat. Chem.*, 2021, **13**, 1006; (d) D. Higuchi, S. Matsubara, H. Kadowaki, D. Tanaka and K. Murakami, *Chem. Eur. J.*, 2023, **29**, e202301071; (e) S. Kar, P. K. Maharana, T. Punniyamurthy and V. Trivedi, *Org. Lett.*, 2023, **25**, 8850.
- M. Fabio, L. Ronzini and L. Troisi, *Tetrahedron*, 2007, **63**, 12896.
- C. Chen, C. Ni, J.-H. Song, L.-Y. Ding, X.-X. Zhang, H. Guo, K. Wang, Z. Chen and B. Zhu, *ACS Catal.*, 2024, **14**, 12181.

## $^1\text{H}$ , $^{13}\text{C}\{^1\text{H}\}$ and $^{19}\text{F}$ NMR Spectra

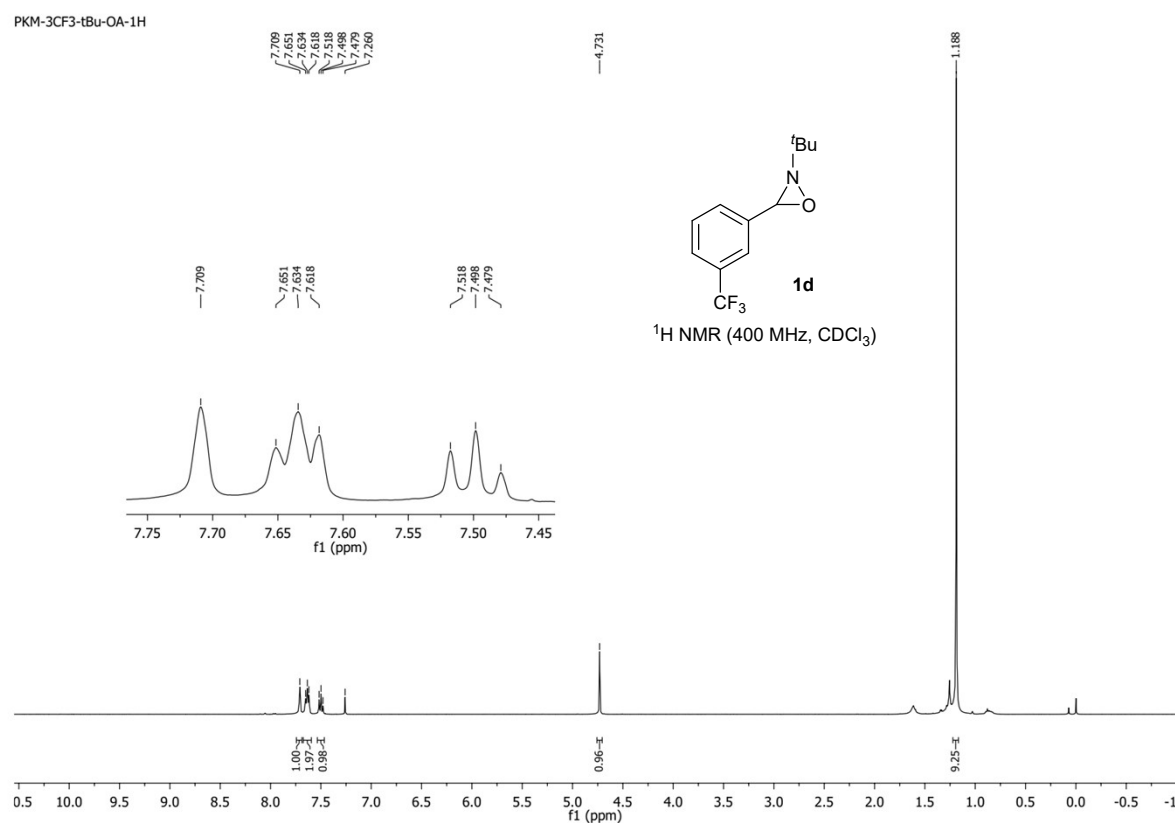

PKM-3CF3-tBu-OA-13C

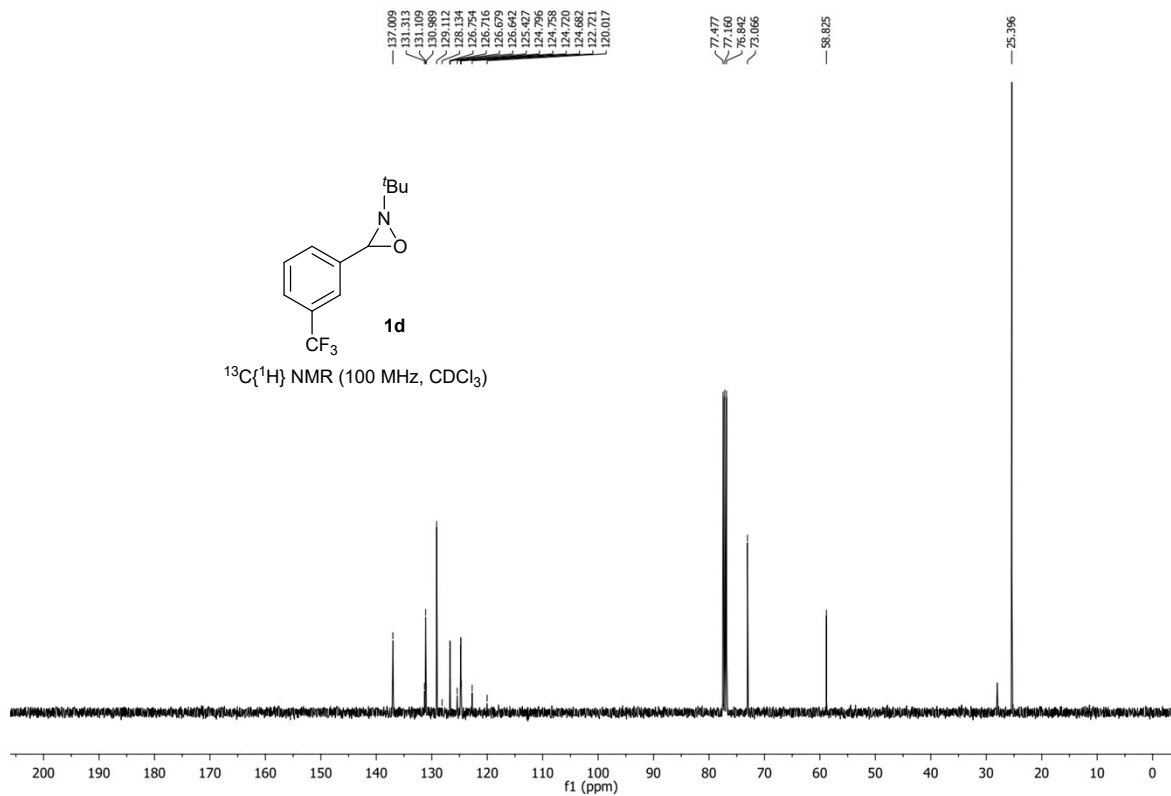

PKM-3CF3-OA-19F

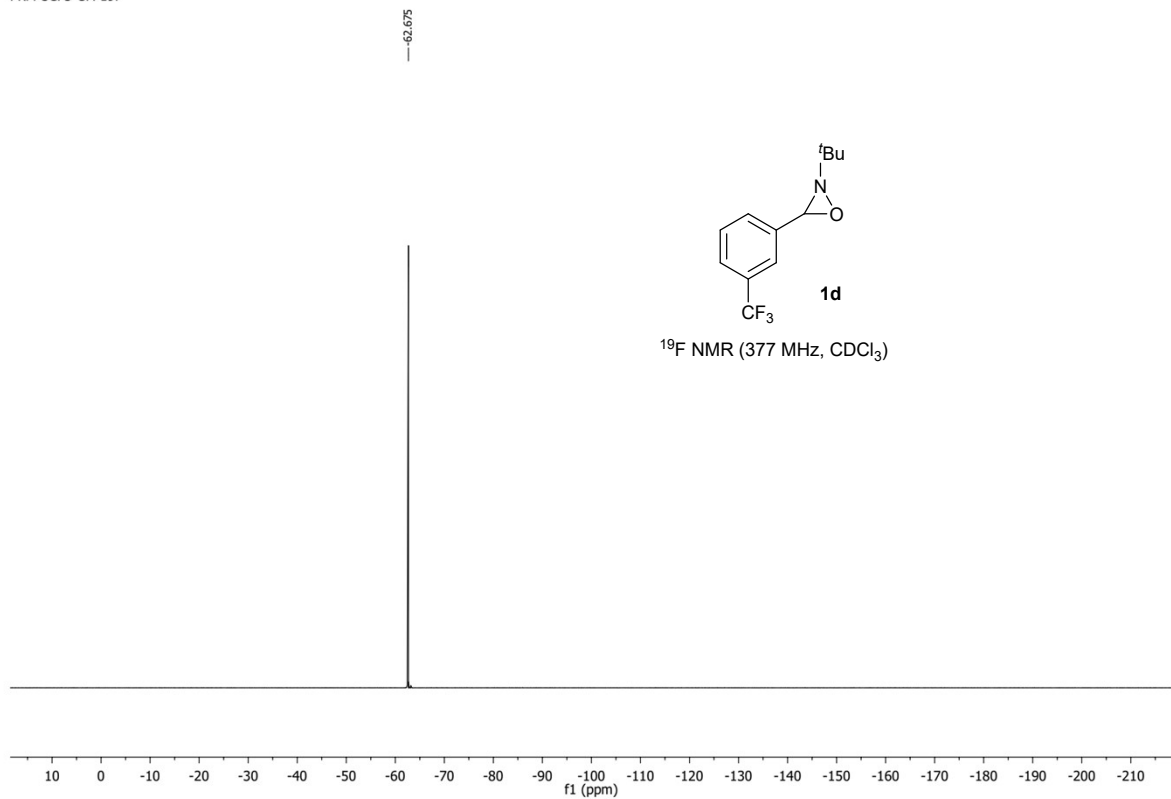

PKM-CUMENE-tBu-OA-1H

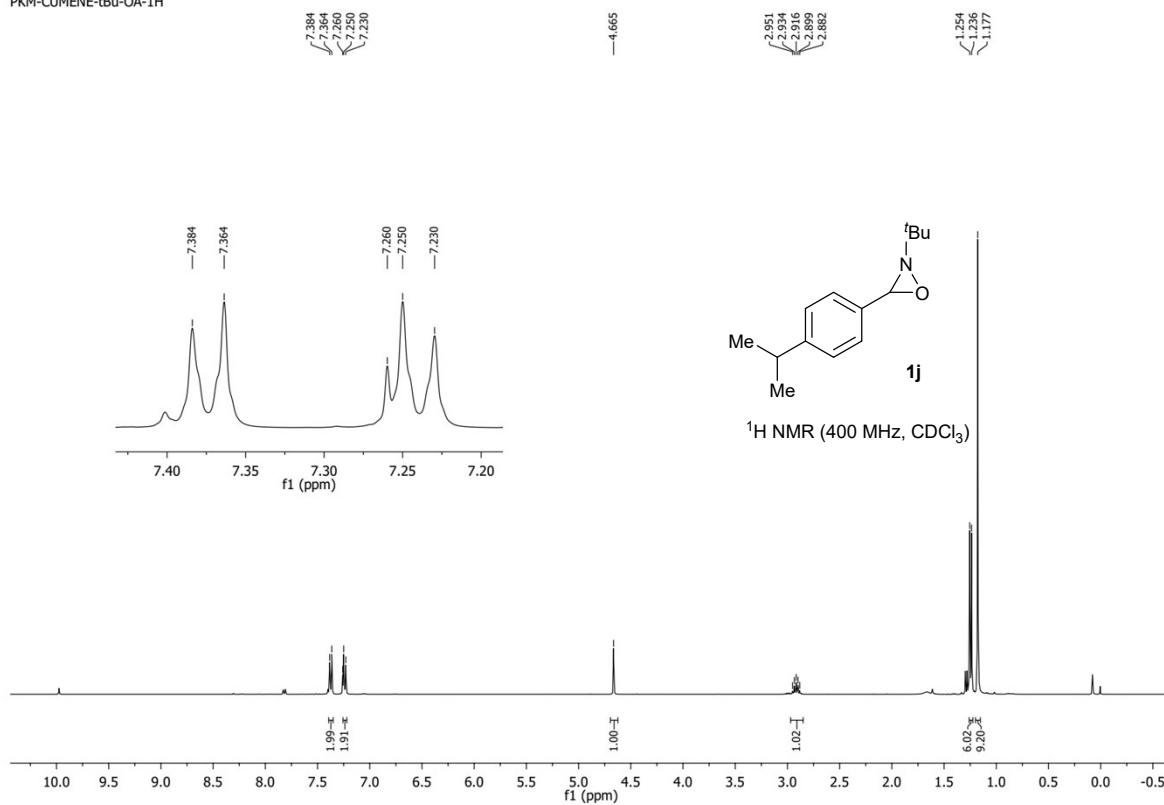

PKM-CUMENE-tBu-OA-13C

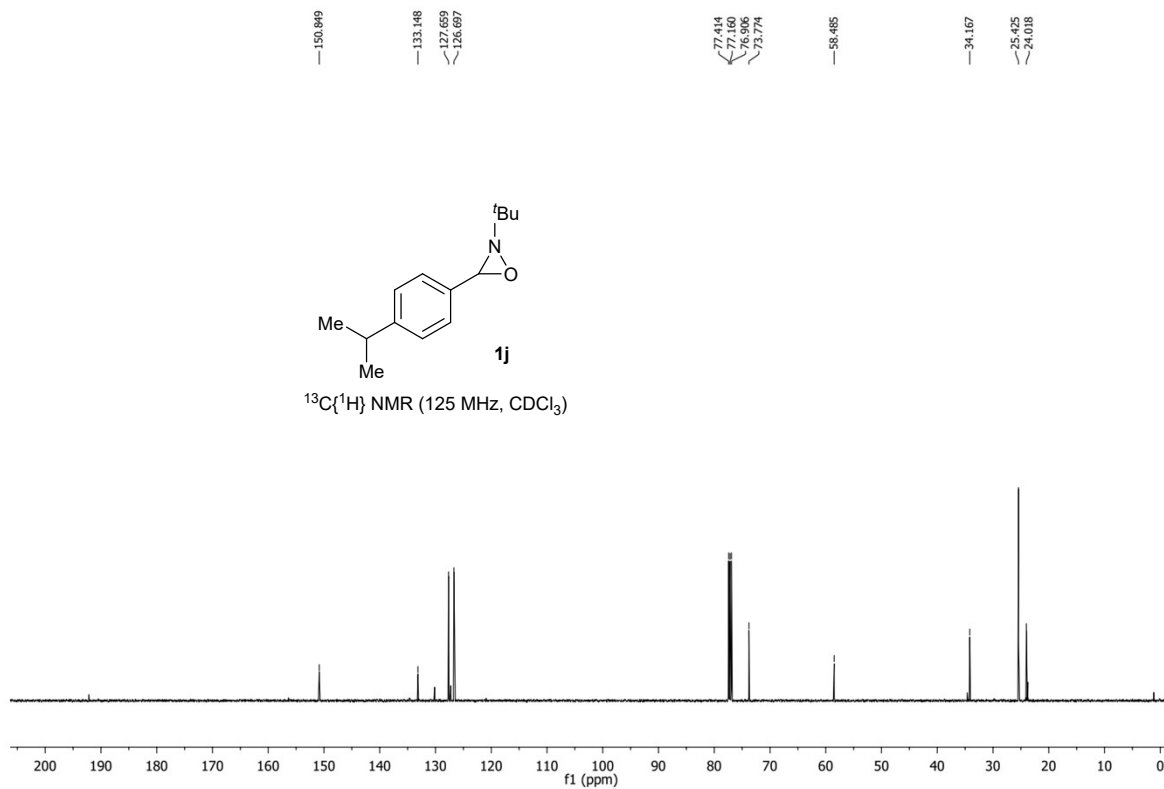

PKM-4Cl-NPr-OA-1H

7.356  
7.353  
7.299  
7.280

4.462

2.957  
2.953  
2.943  
2.938  
2.928  
2.913  
2.794  
2.718  
2.706  
2.693  
1.786  
1.771  
1.757  
1.742  
1.728  
1.713  
1.036  
1.021  
1.006

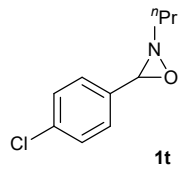

<sup>1</sup>H NMR (500 MHz, CDCl<sub>3</sub>)

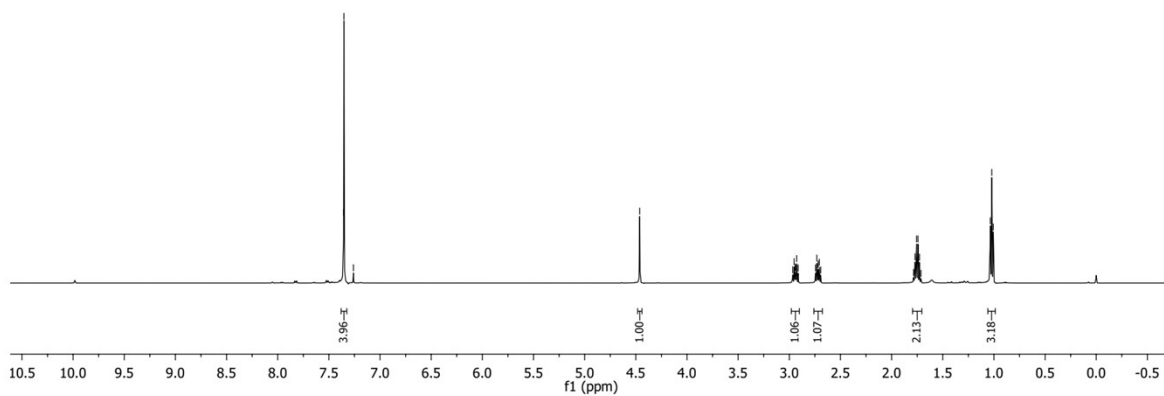

PKM-4Cl-NPr-OA-13c

136.101  
133.606  
128.885  
128.885

79.829  
77.414  
77.160  
76.906

64.003

21.405

12.007

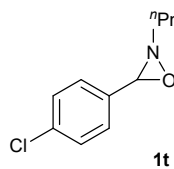

<sup>13</sup>C{<sup>1</sup>H} NMR (125 MHz, CDCl<sub>3</sub>)

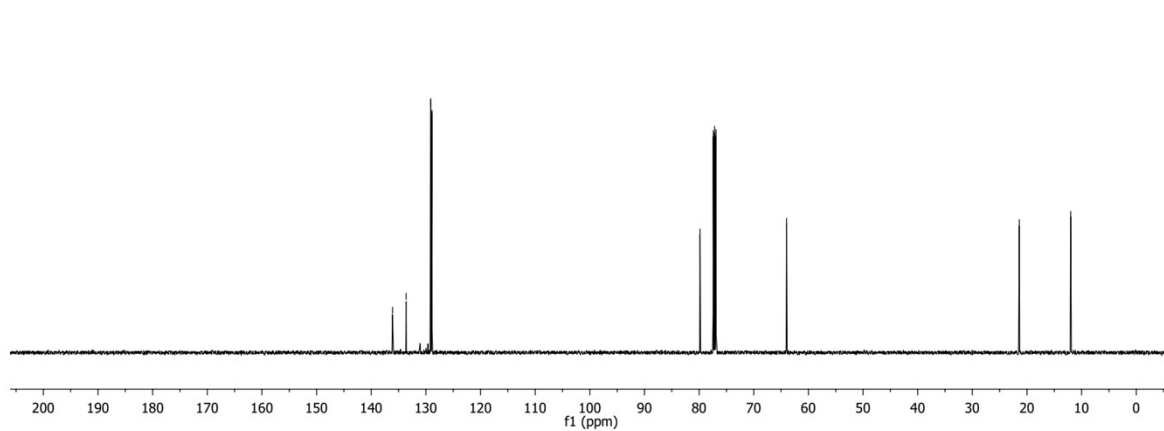

PKM-4Me-NPr-OA-1H

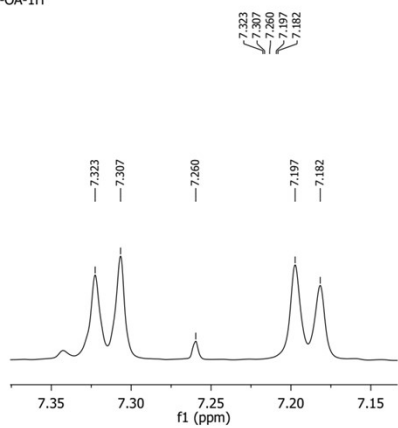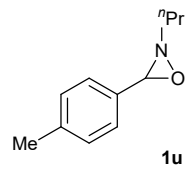

$^1\text{H}$  NMR (500 MHz,  $\text{CDCl}_3$ )

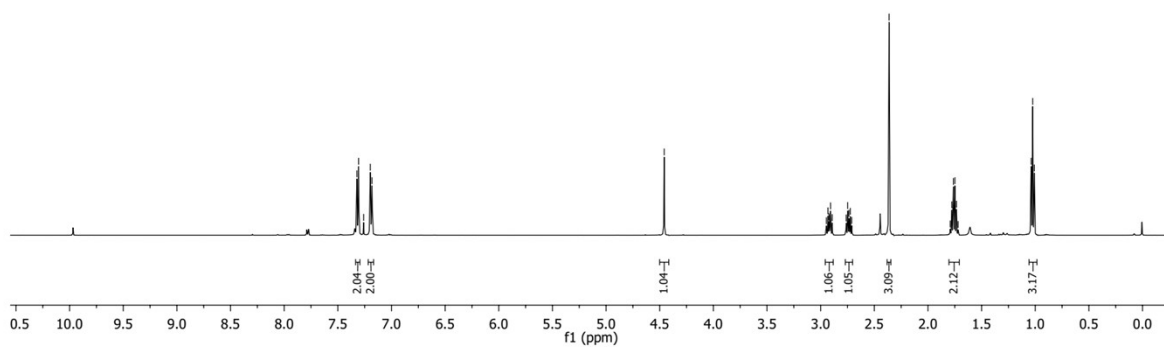

PKM-4Me-NPr-OA-13C

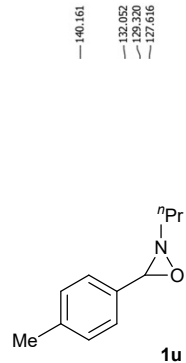

$^{13}\text{C}\{^1\text{H}\}$  NMR (125 MHz,  $\text{CDCl}_3$ )

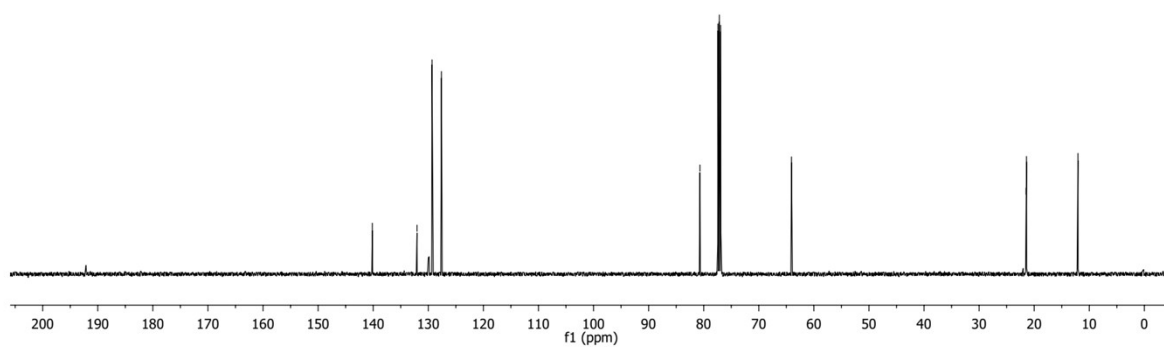

PKM-2-NAPH-NPr-OA-1H

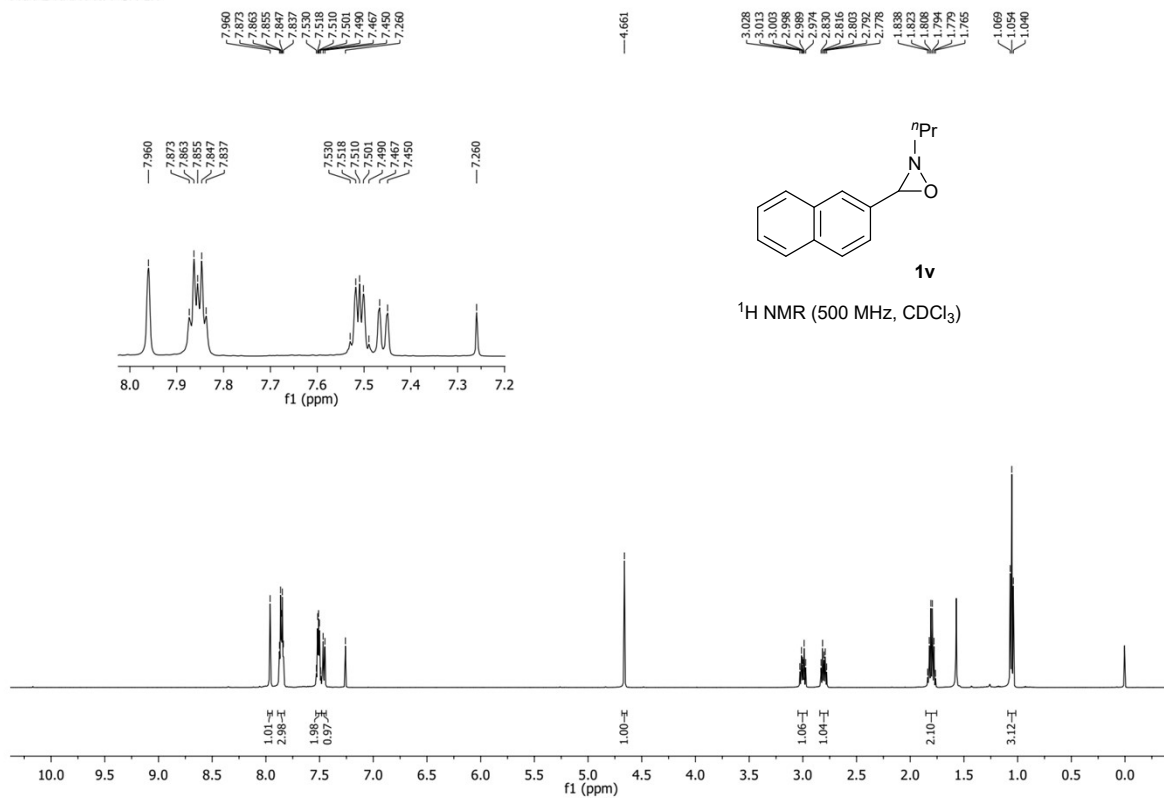

PKM-2-NAPH-NPr-OA-13C

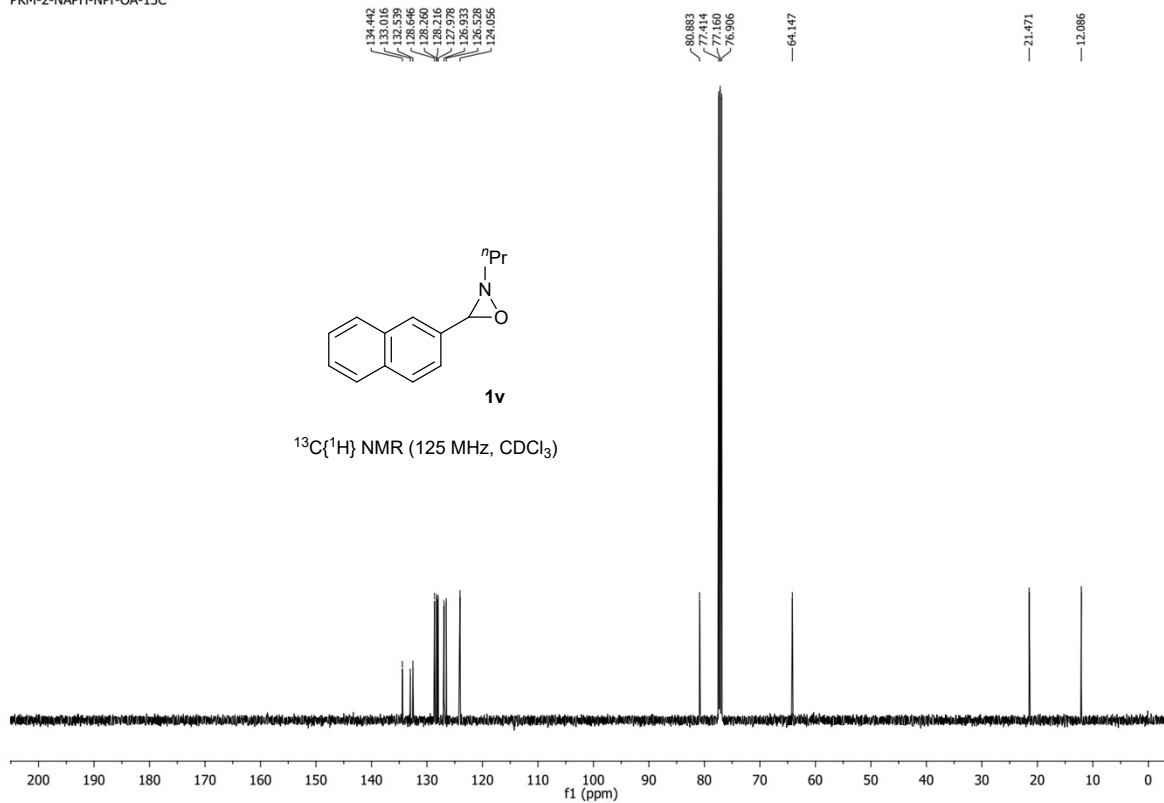

PKM-764-A-1H

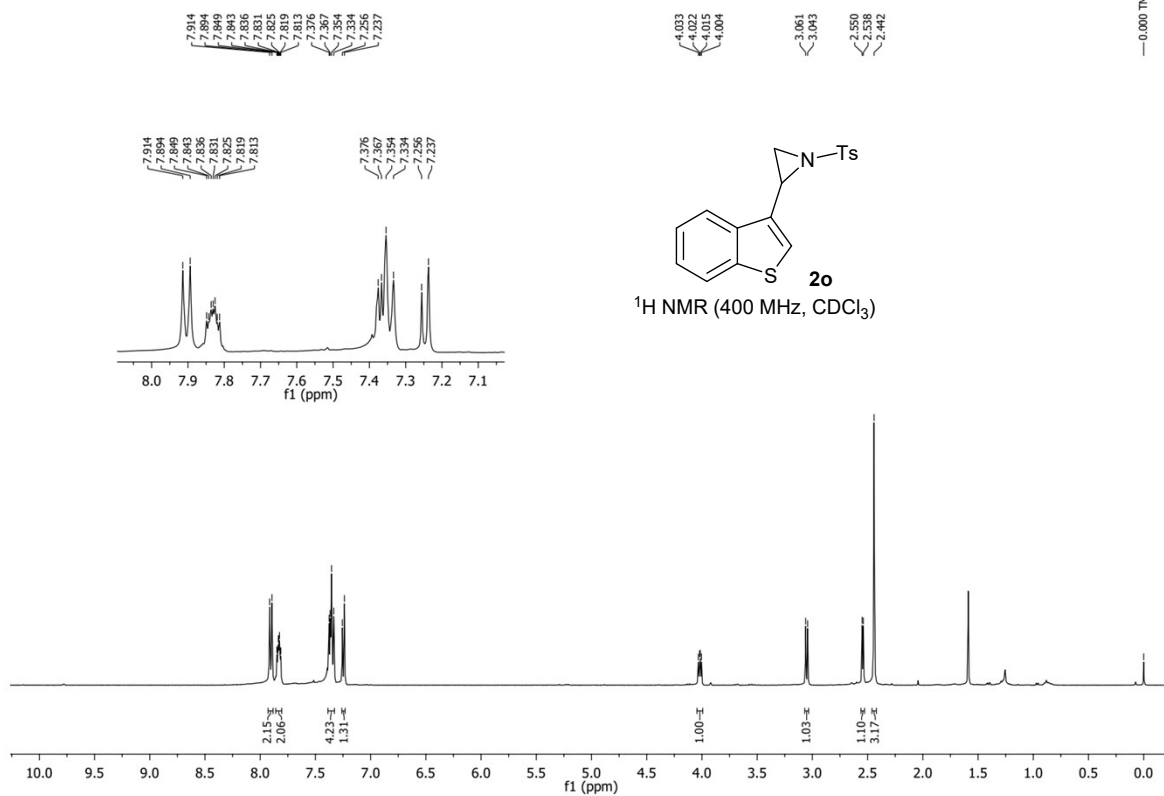

PKM-764-13C

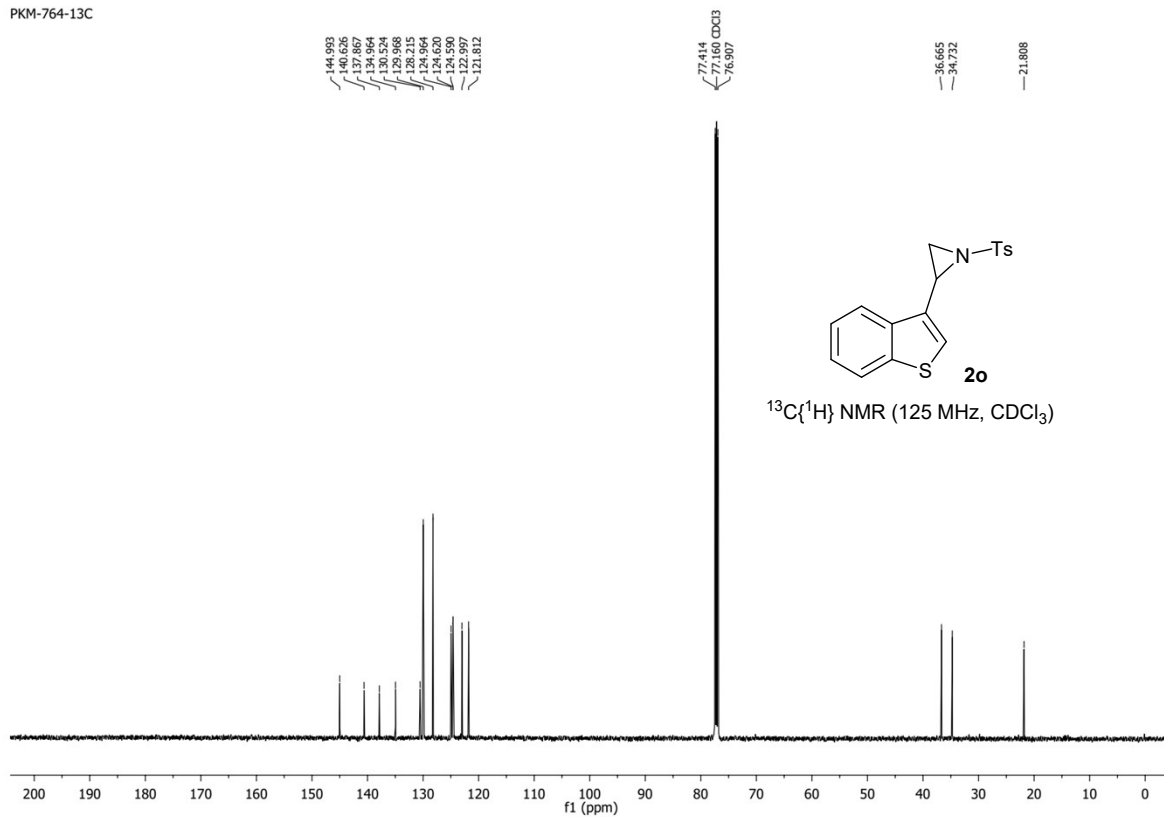

PKM-DIOXOLO-AZI-1H

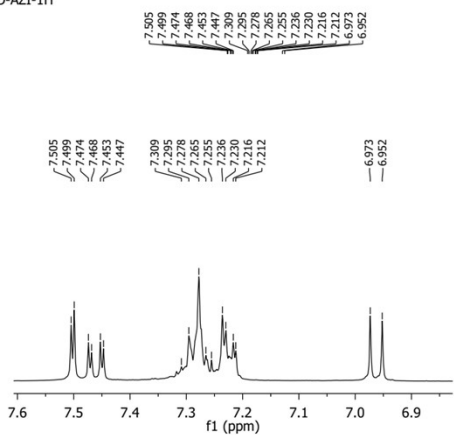

4.301  
4.288  
4.274  
4.261  
3.780  
3.766  
3.752  
3.731  
2.946  
2.928  
2.375  
2.364

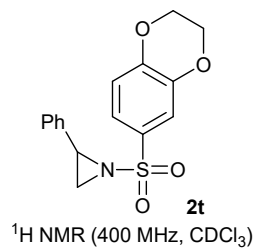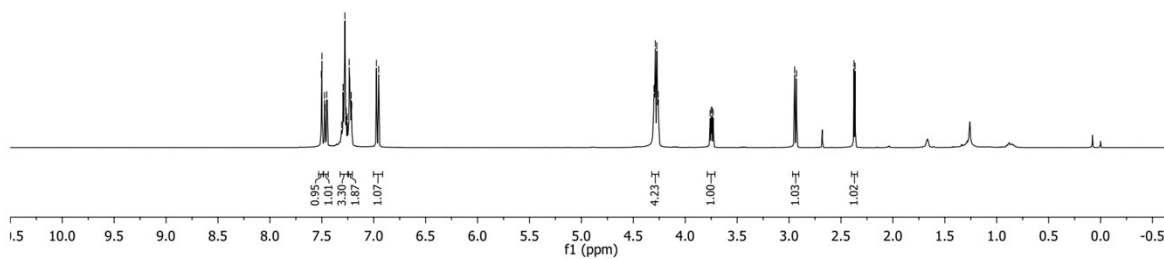

PKM-DIOXOLO-AZI-13C

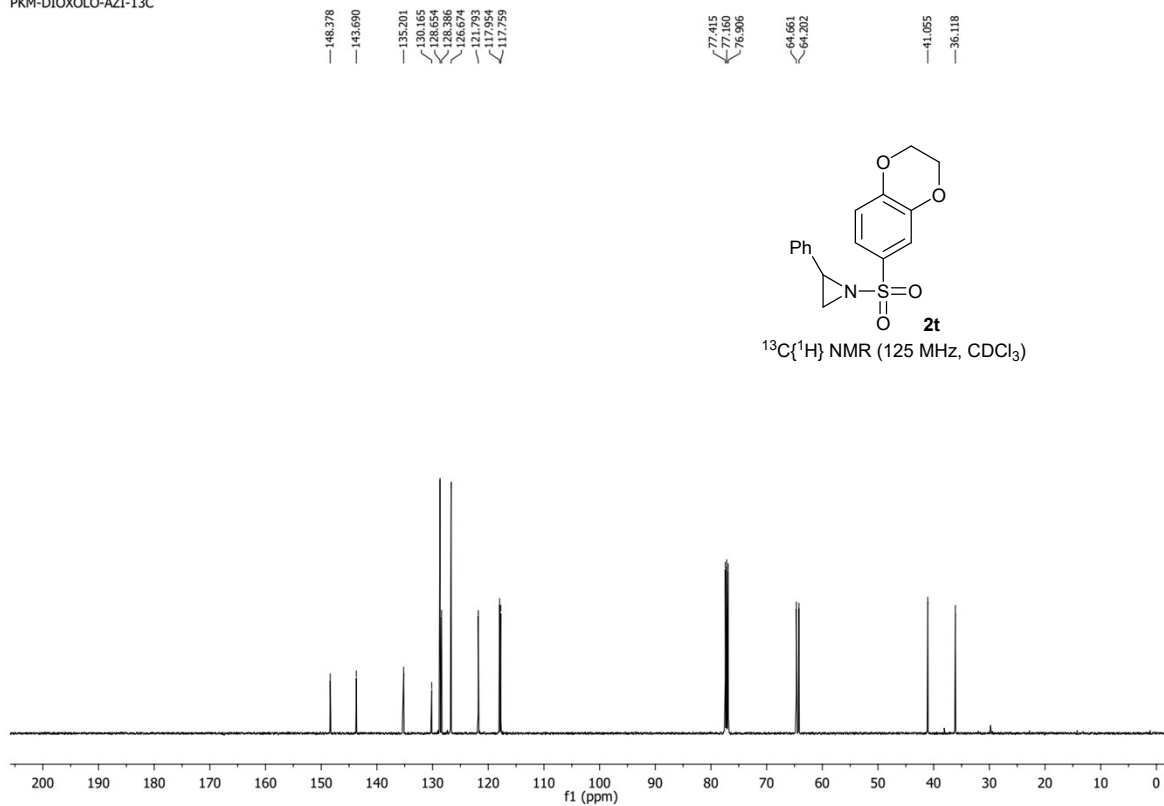

PKM-OA-AZI-1H

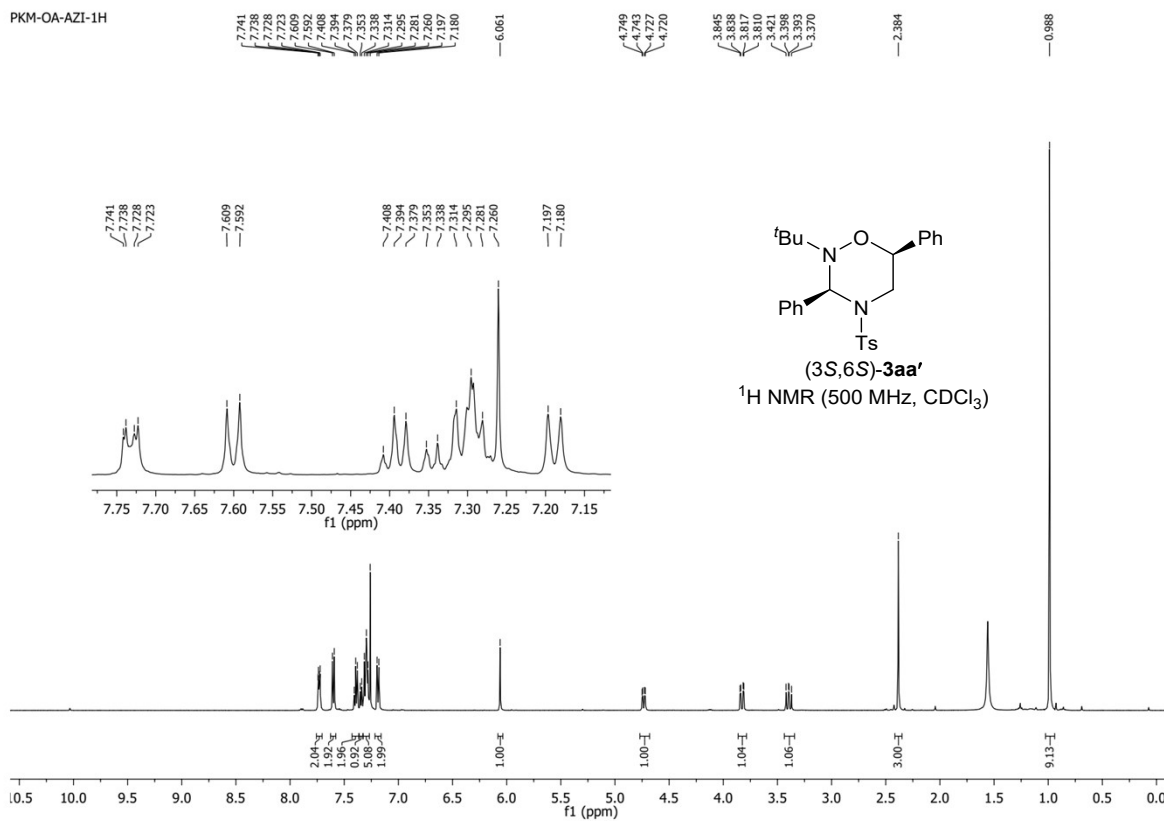

PKM-OA-AZI-13C

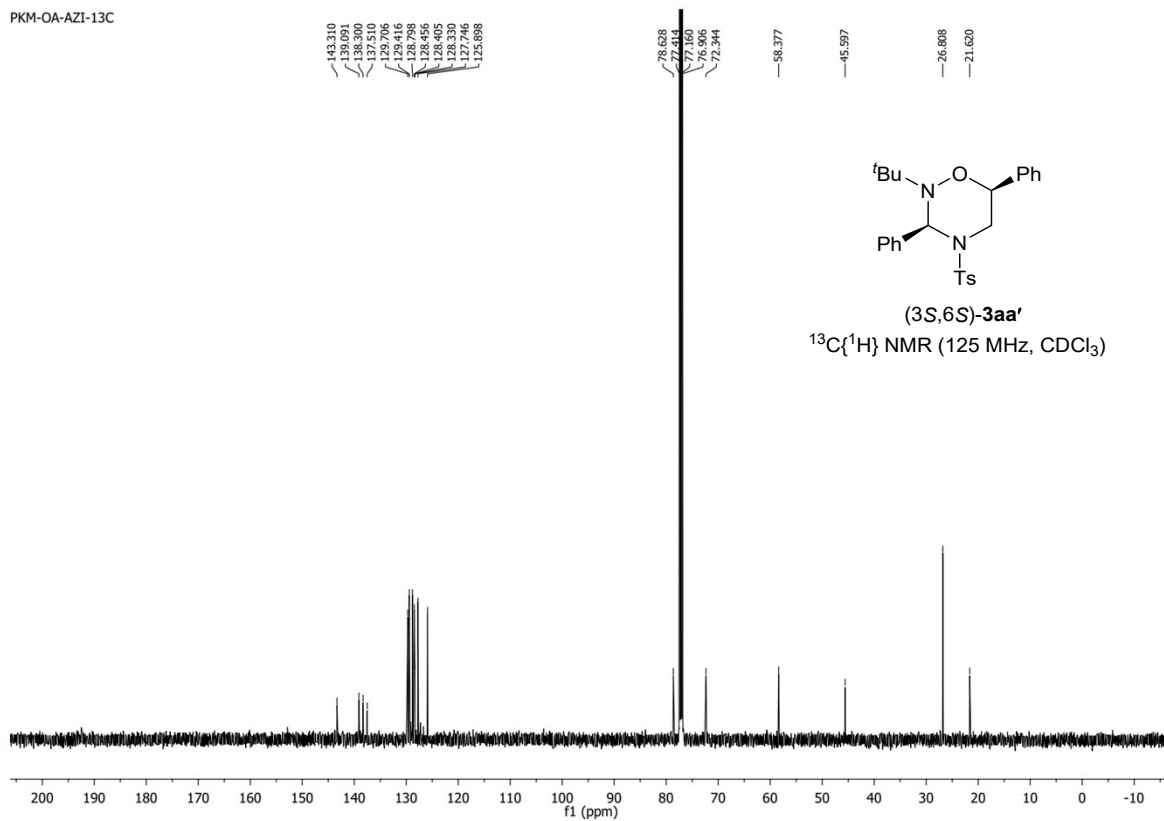

PKM-OA-2F-AZI-1H

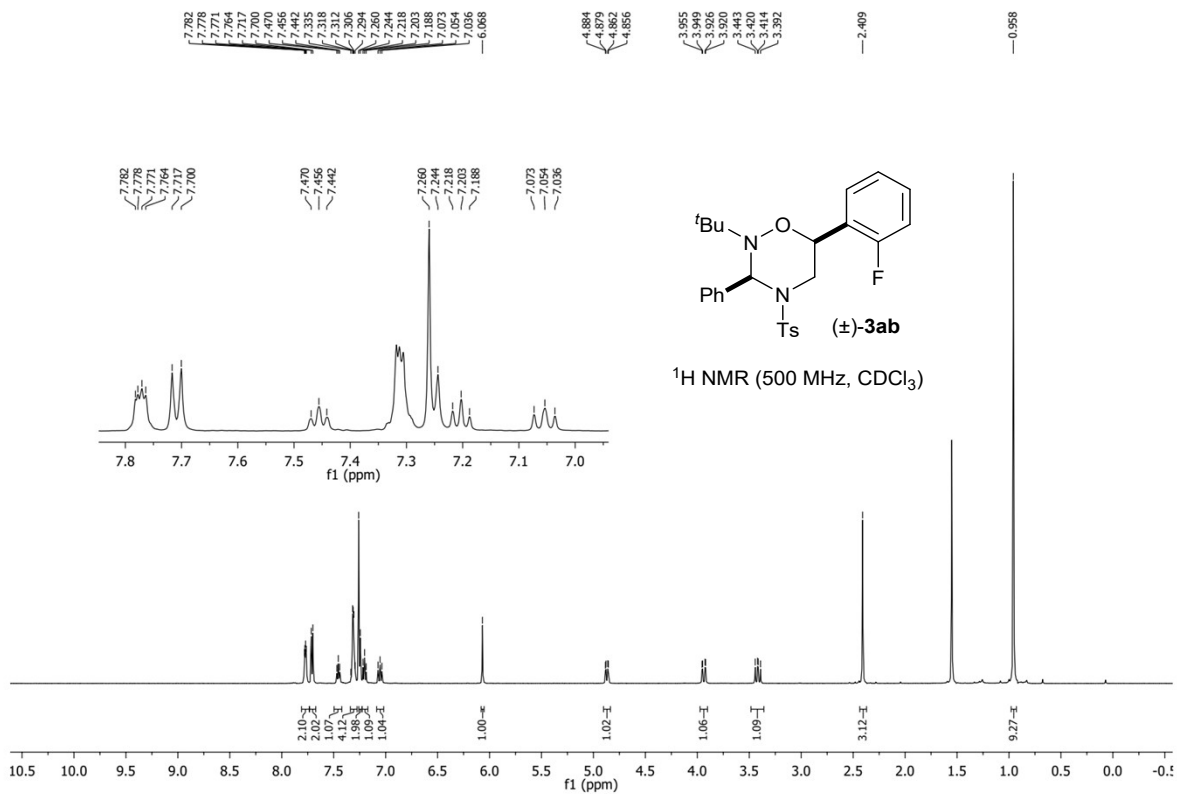

PKM-OA-2F-AZI-13C

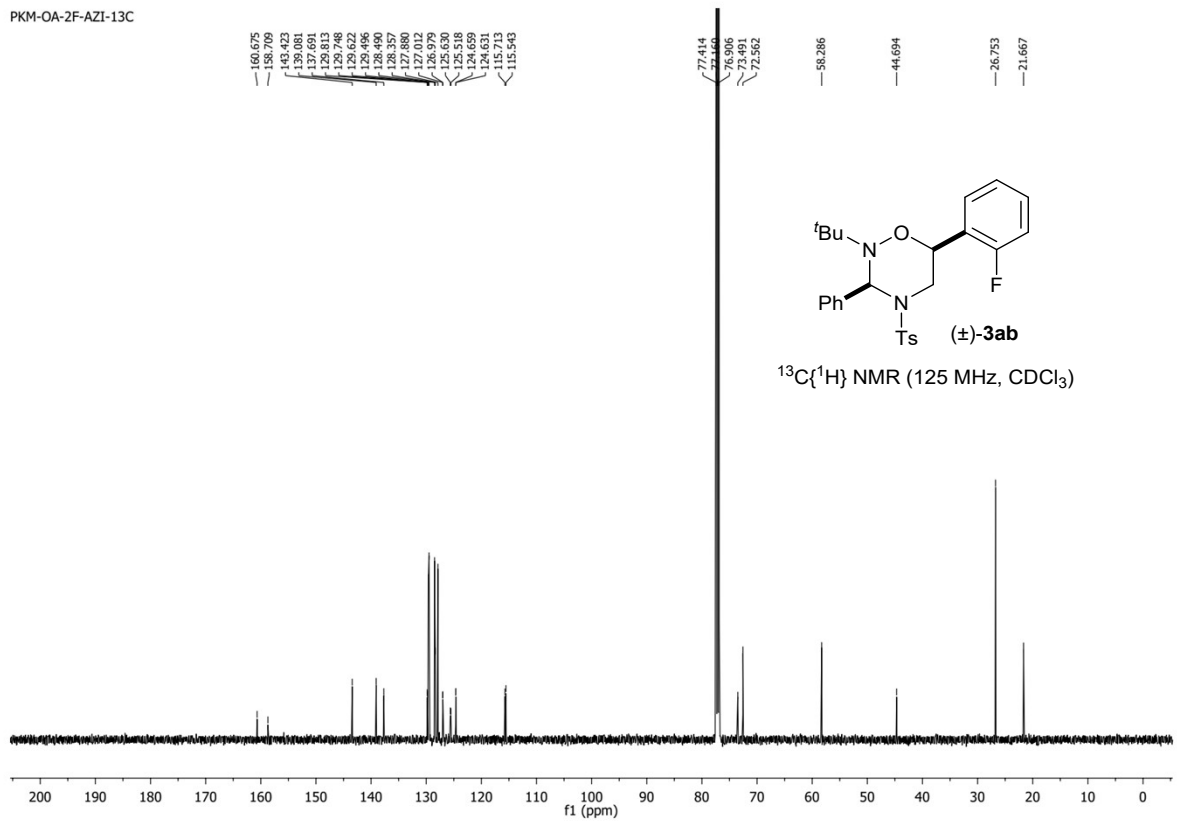

PKM-OA-2F-AZI-19F

— 117.431

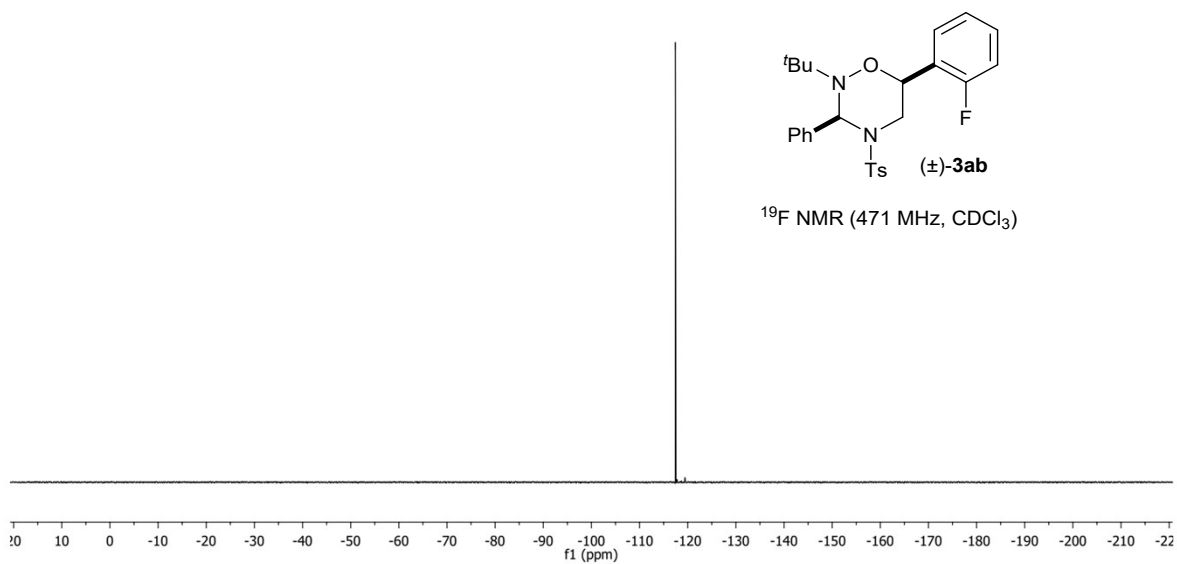

PKM-OA-4-Br-AZI-1H

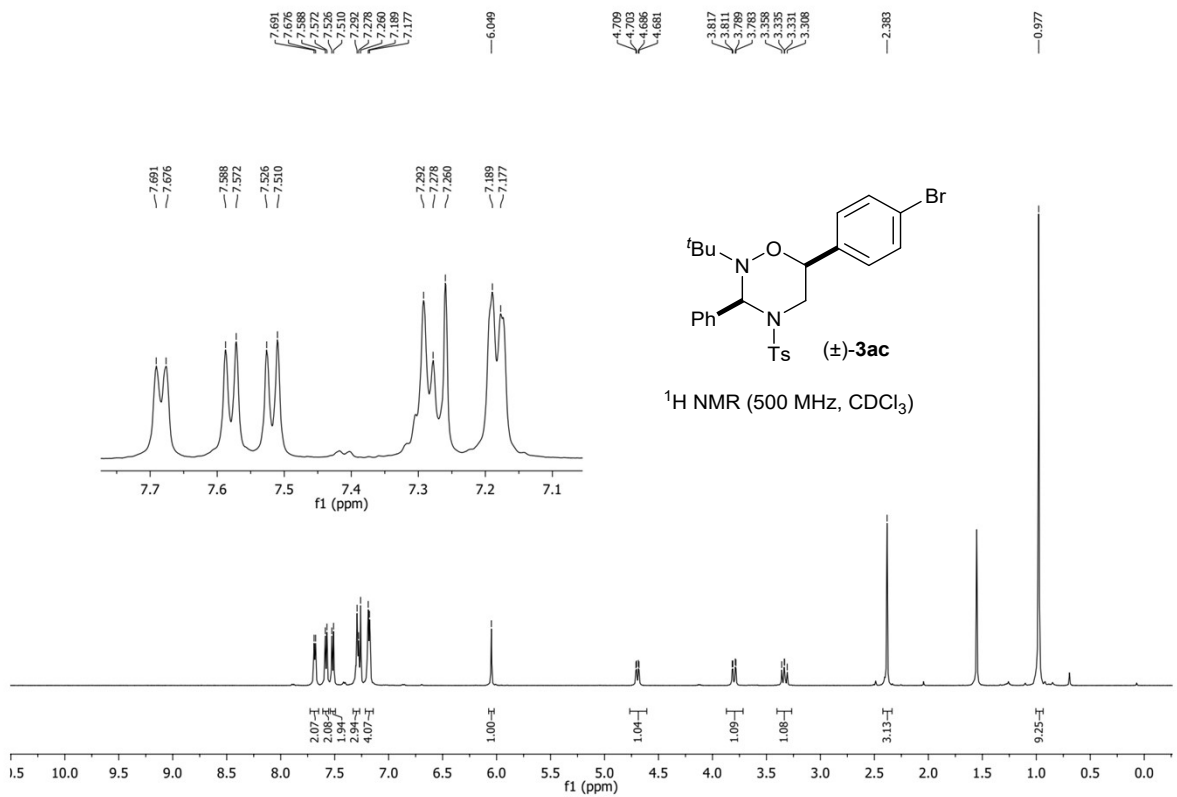

PKM-OA-4-Br-AZI-13C

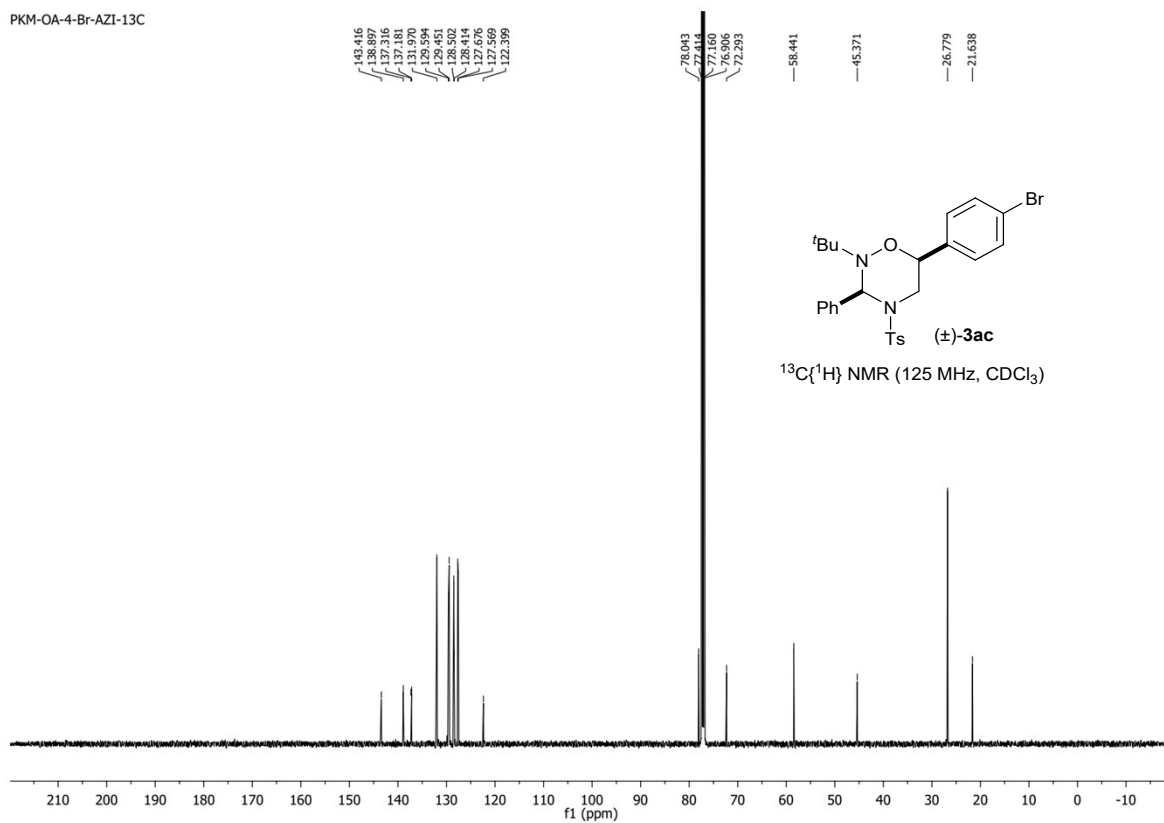

PKM-OA-4CL-AZI-1H

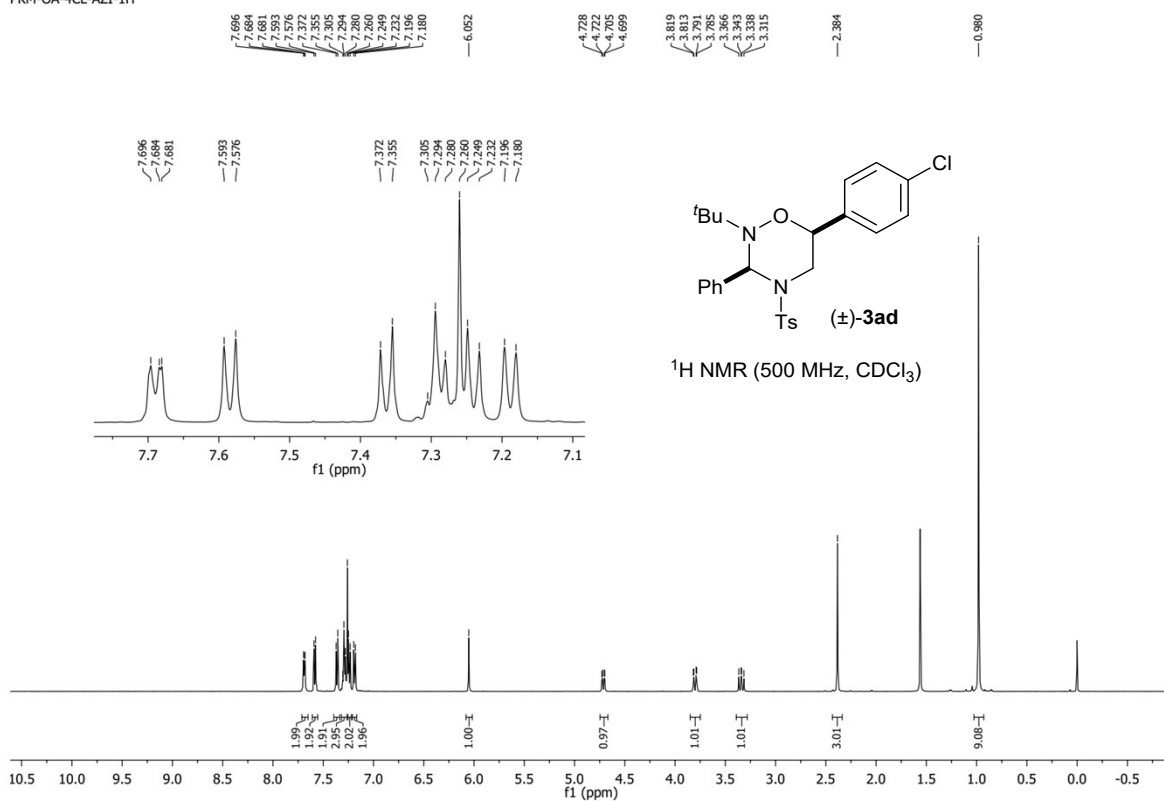

PKM-OA-4CL-AZI-13C

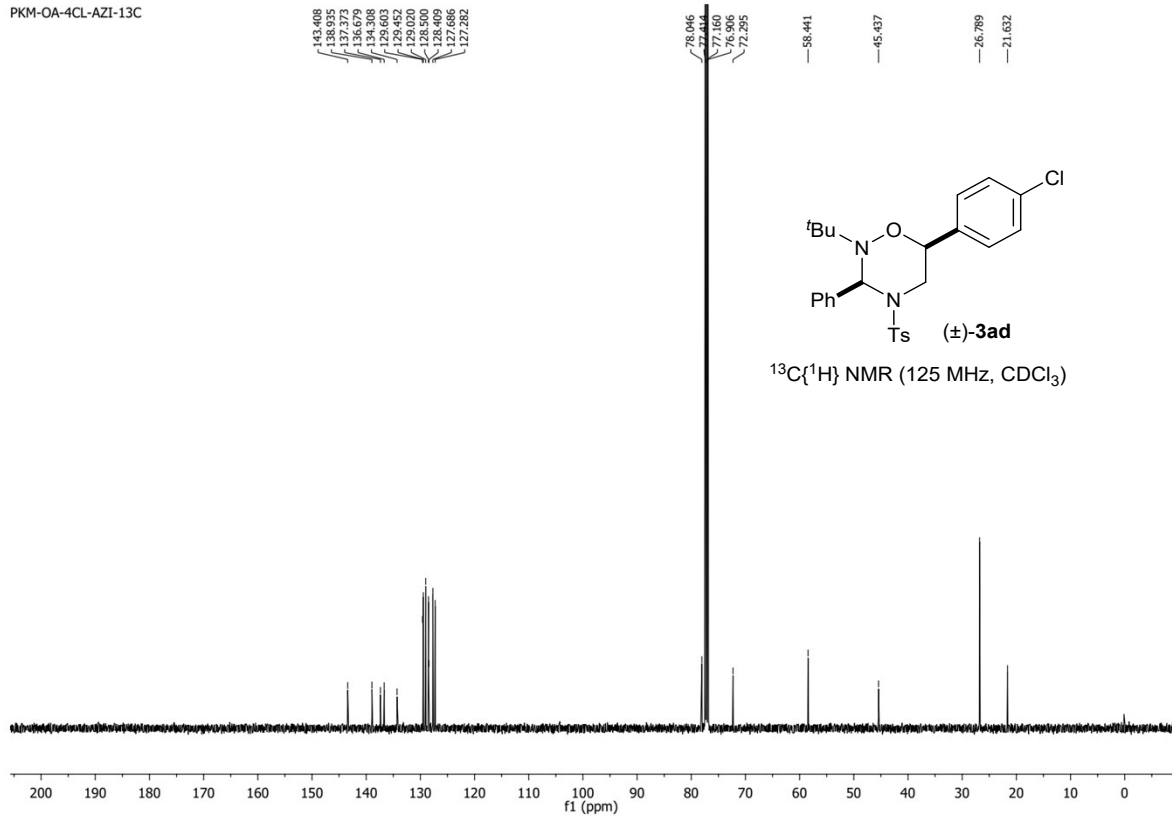

PKM-OA-4Me-AZI-1H

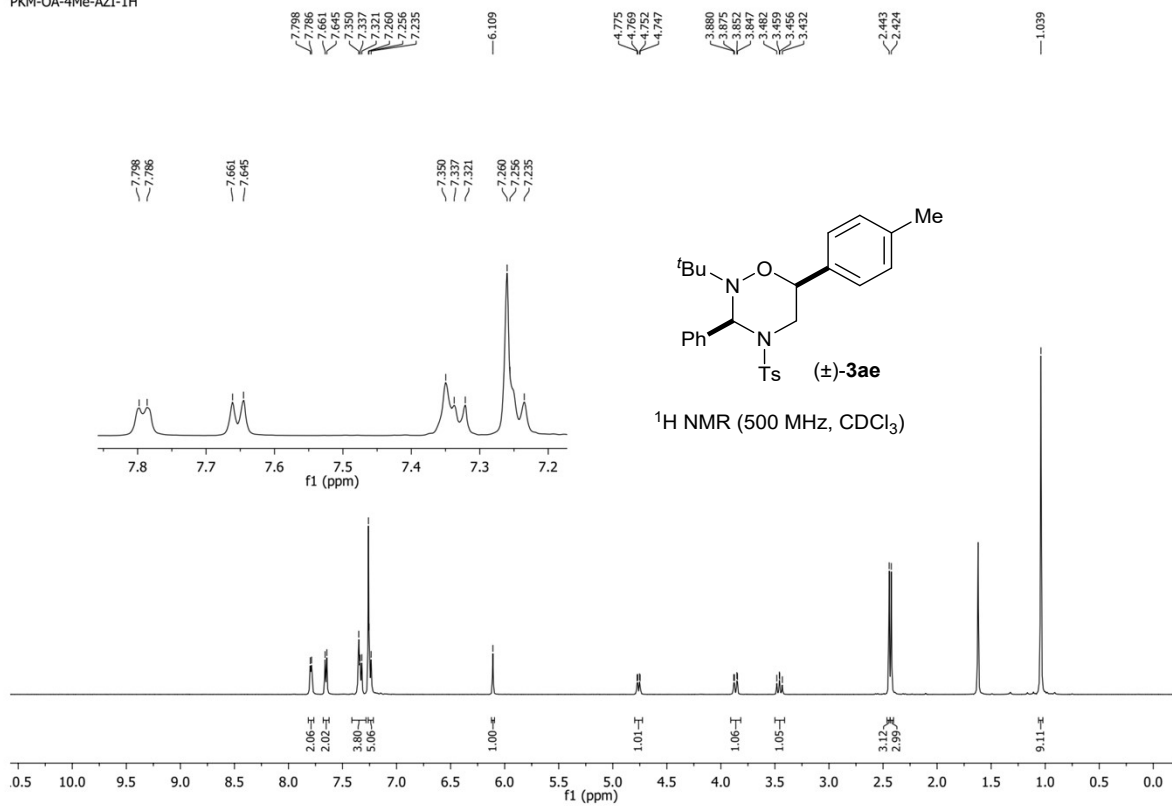

PKM-OA-4Me-AZI-13C

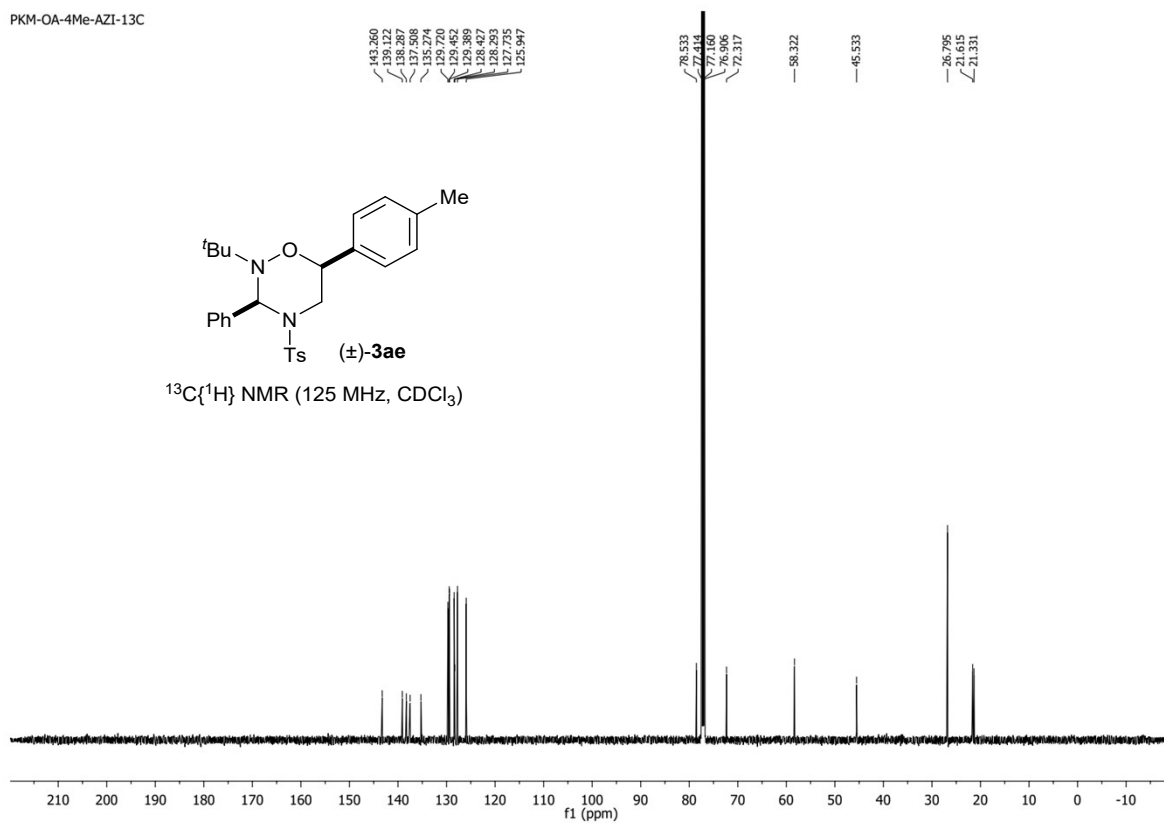

PKM-OA-BP-AZI-1H

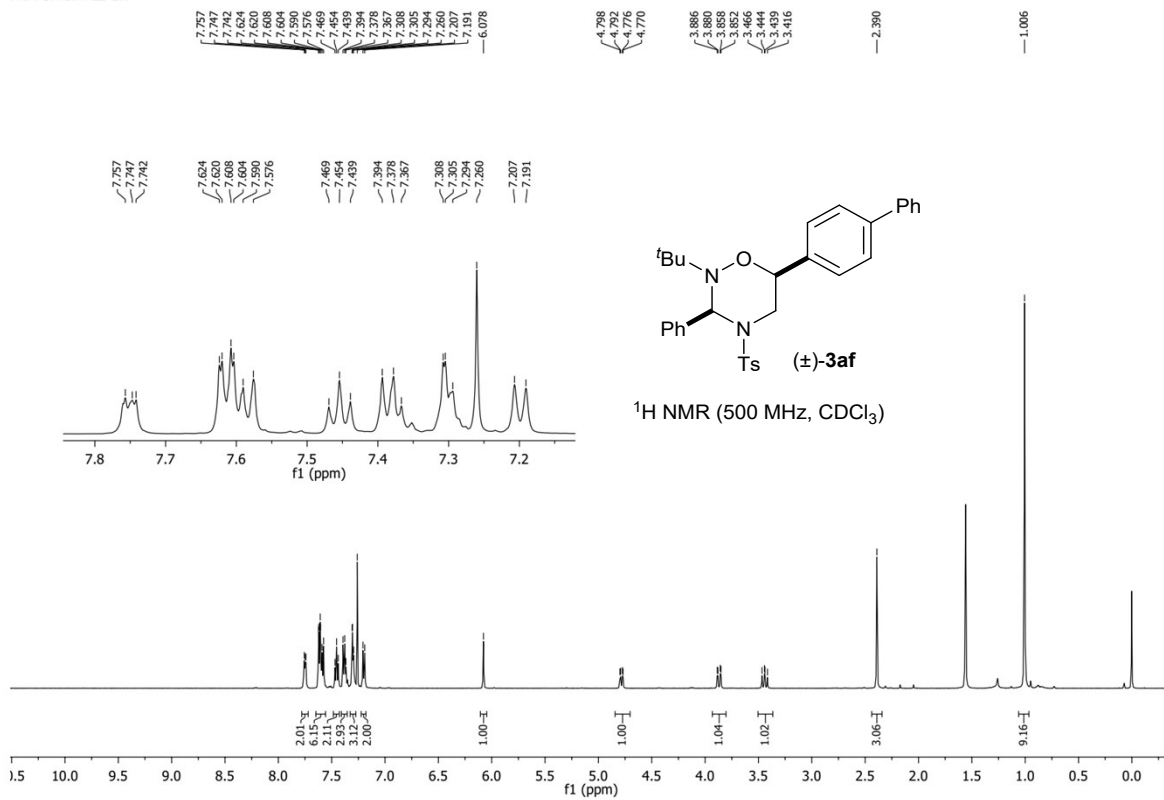

PKM-OA-BP-AZI-13C

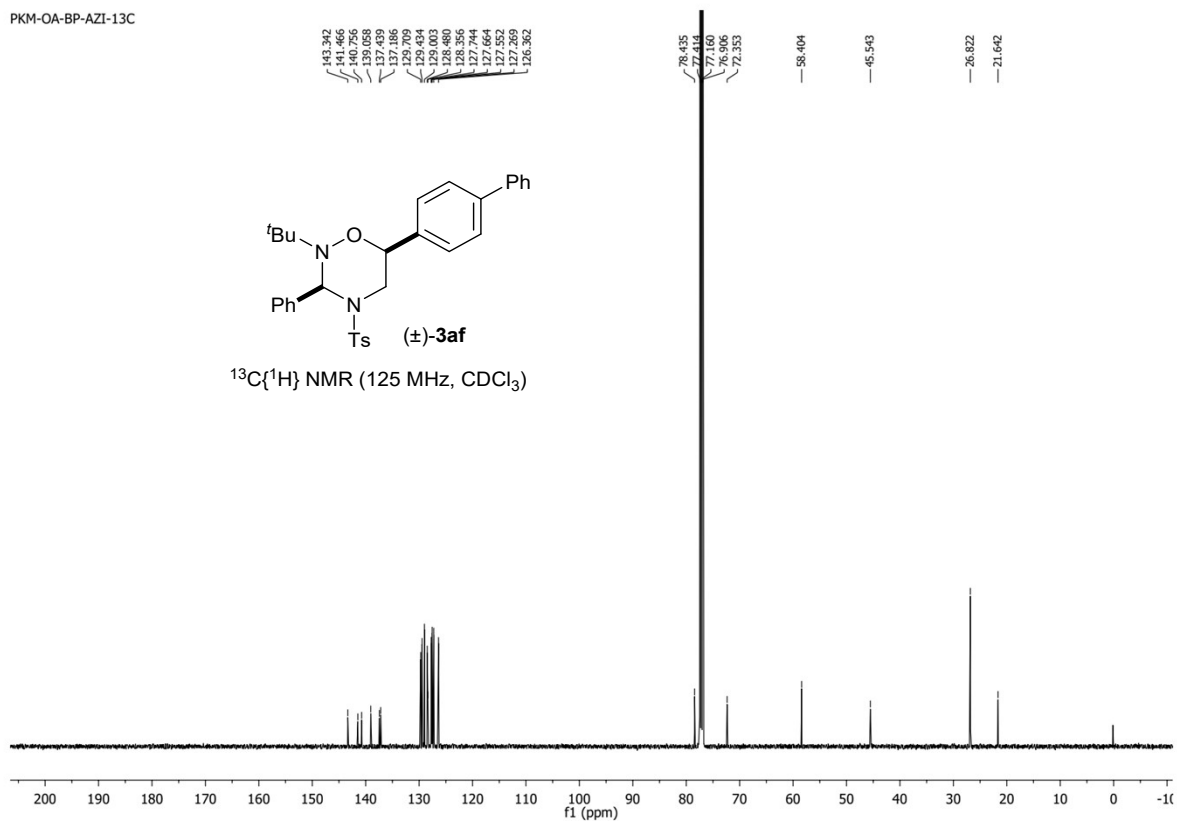

PKM-OA-2,4-diMe-AZI-1H

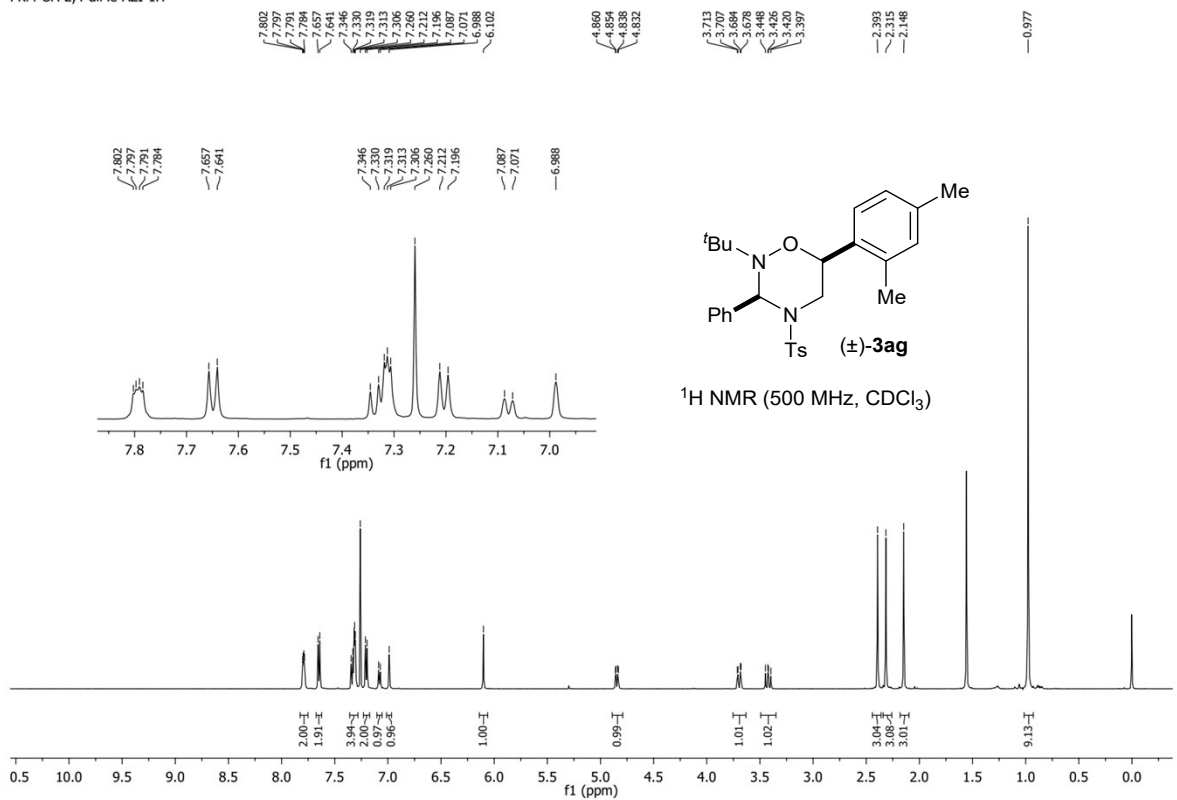

PKM-OA-2,4-diMe-AZI-13C

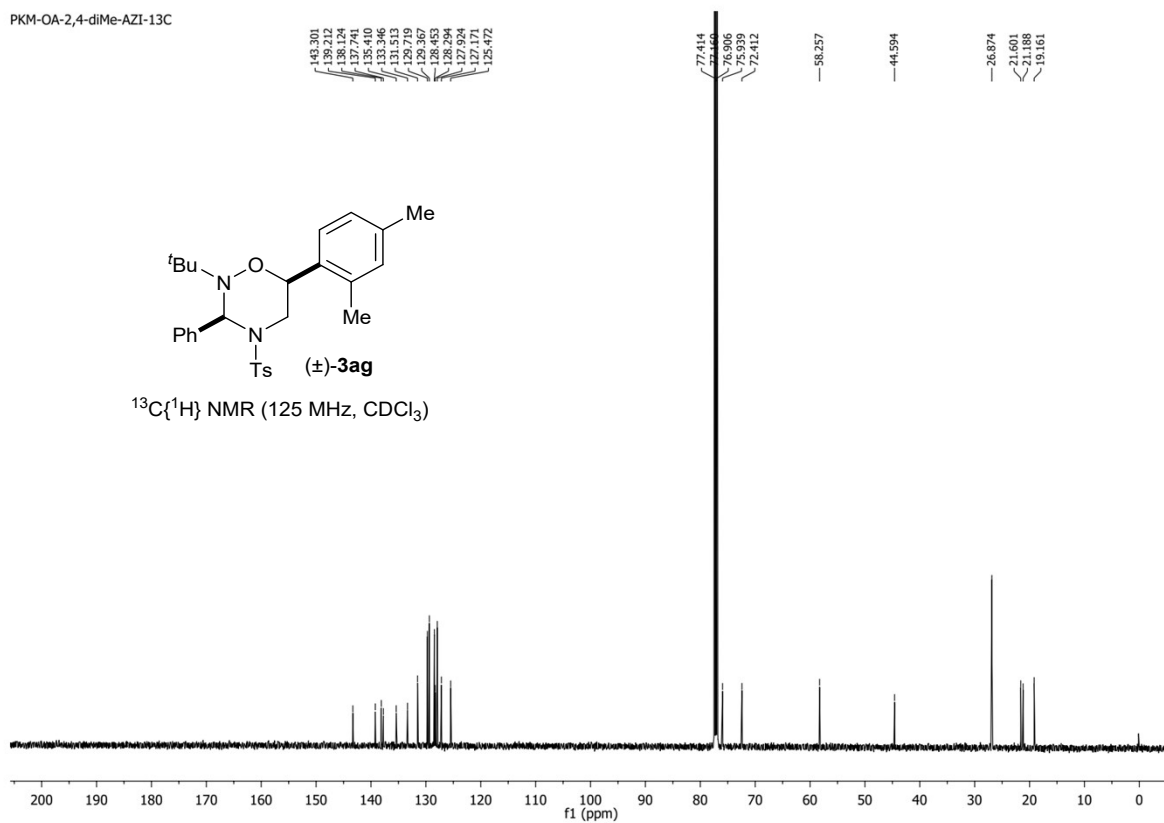

PKM-OA-2NAPHTHYL-AZI-1H

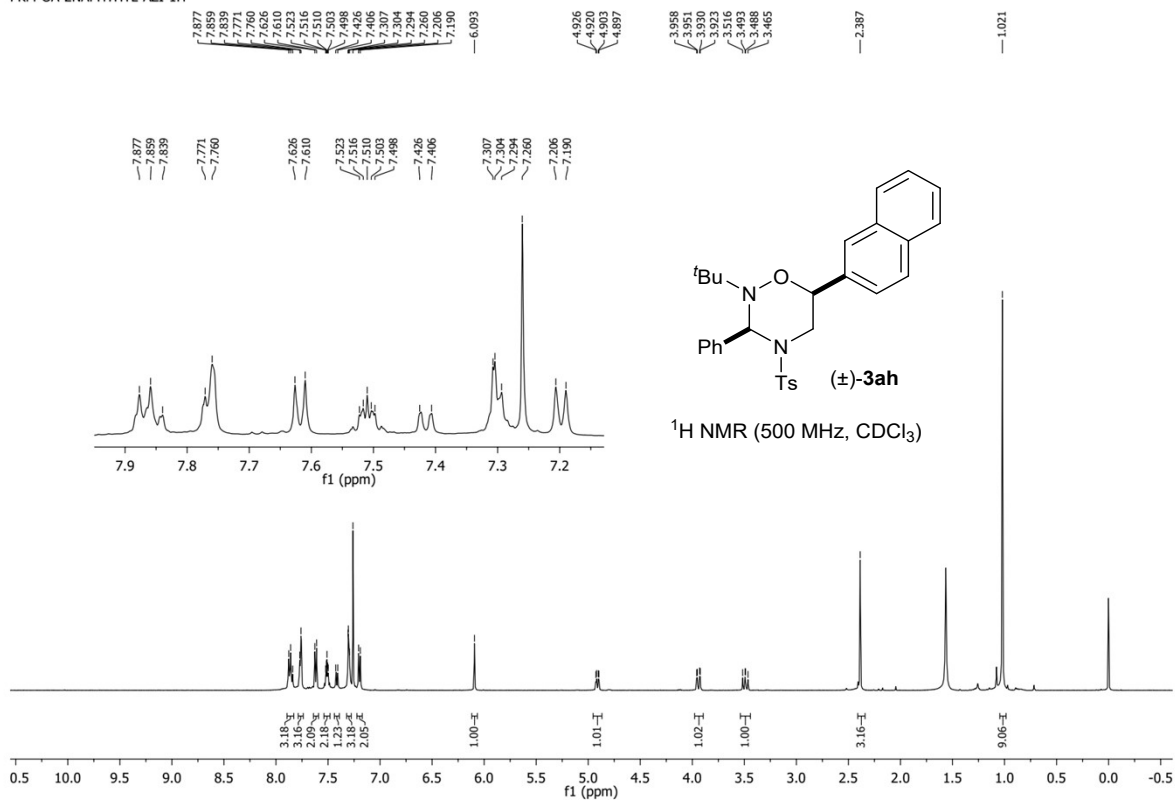

PKM-OA-2NAPHTHYL-AZI-13C

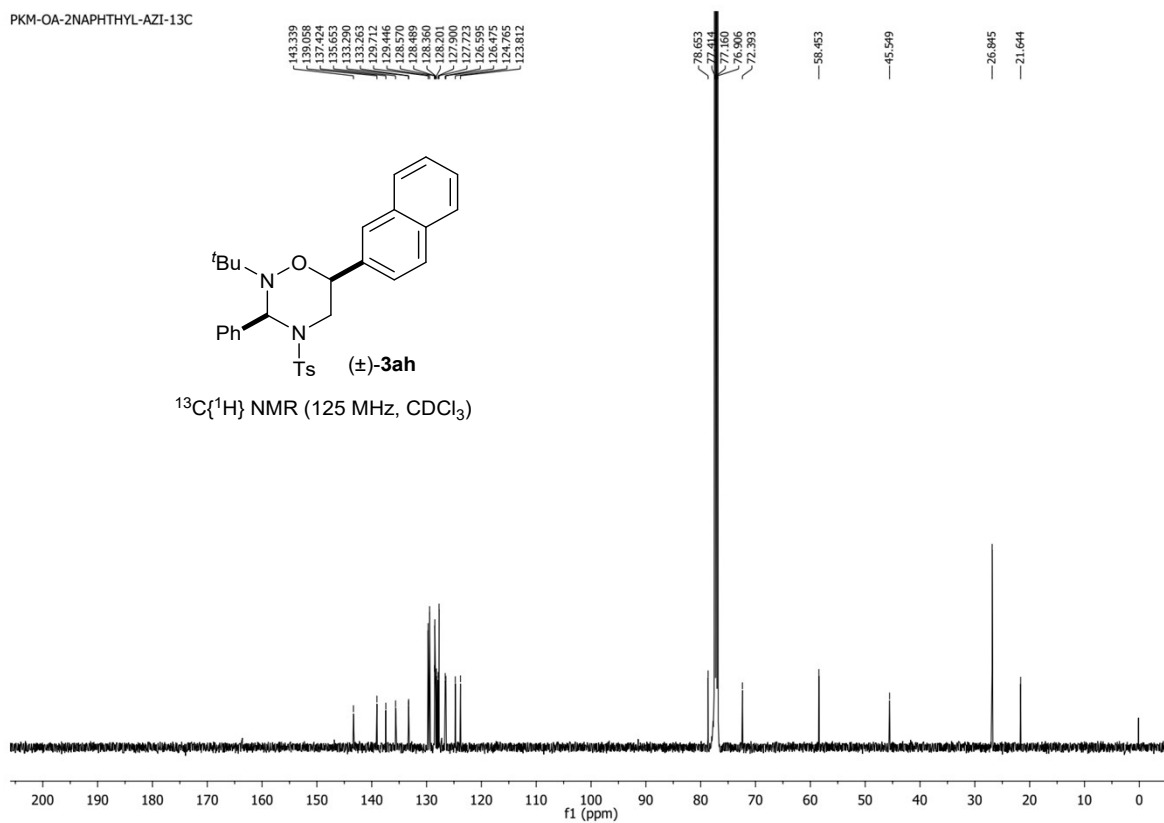

PKM-OA-PH-TS-AZI-1H

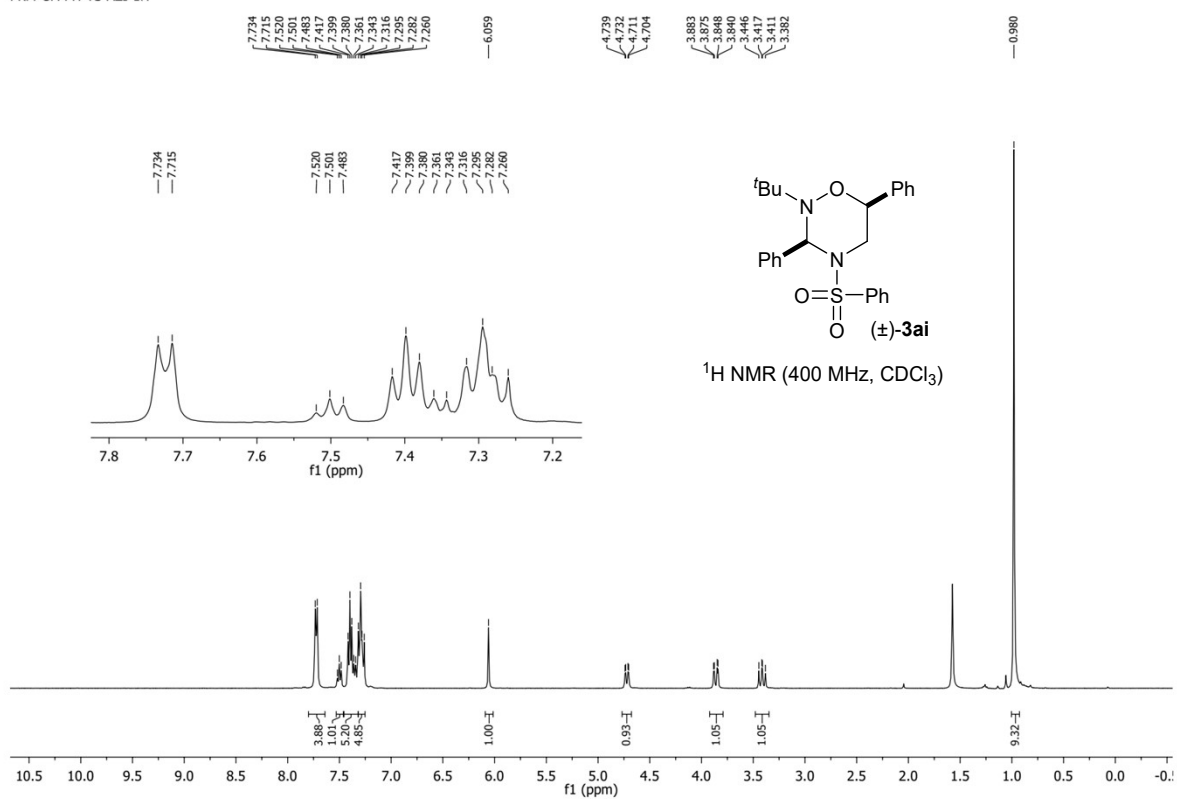

PKM-OA-PH-TS-AZI-13C

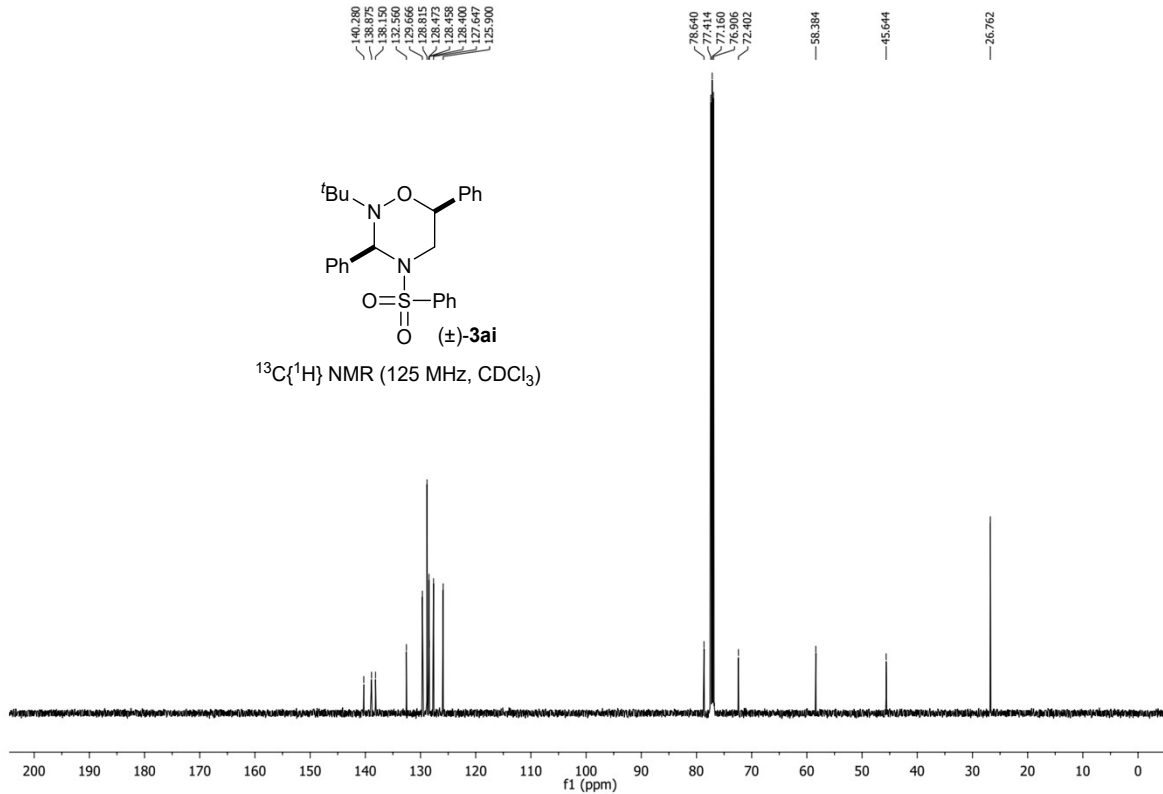

PKM-OA-4-OMe-TS-AZI-1H

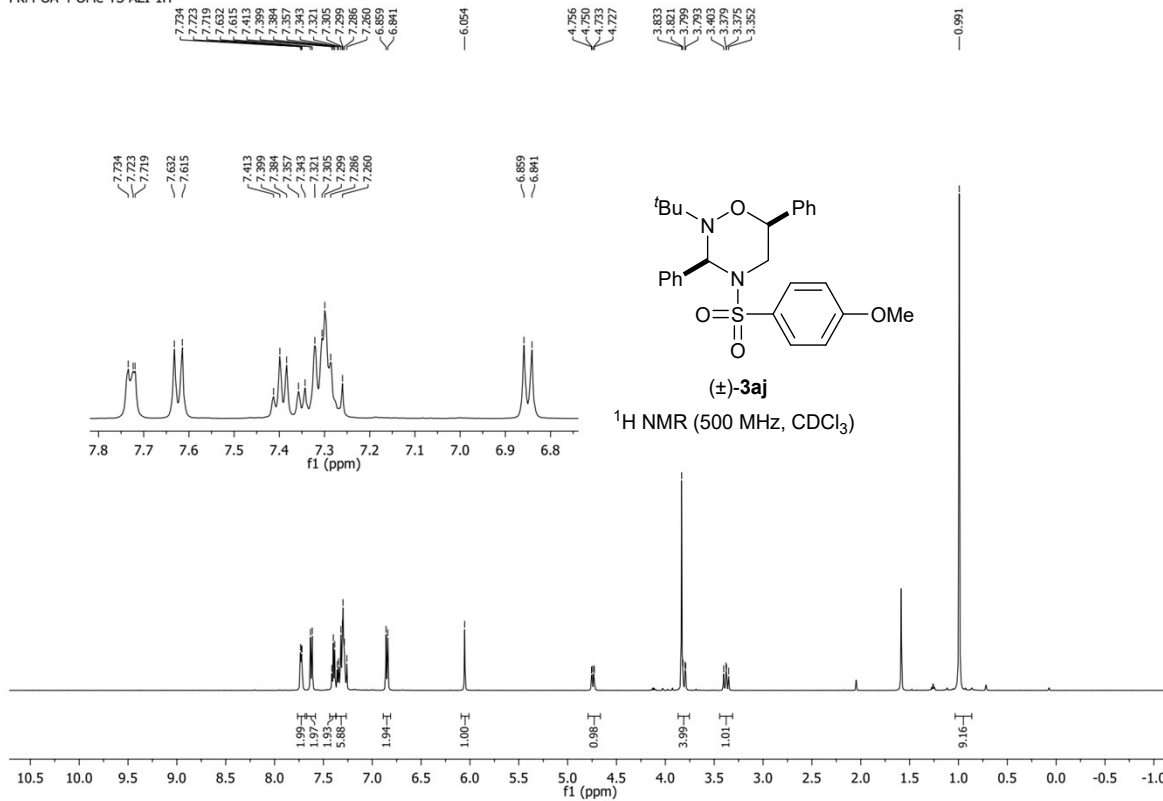

PKM-OA-4-OMe-TS-AZI-13C

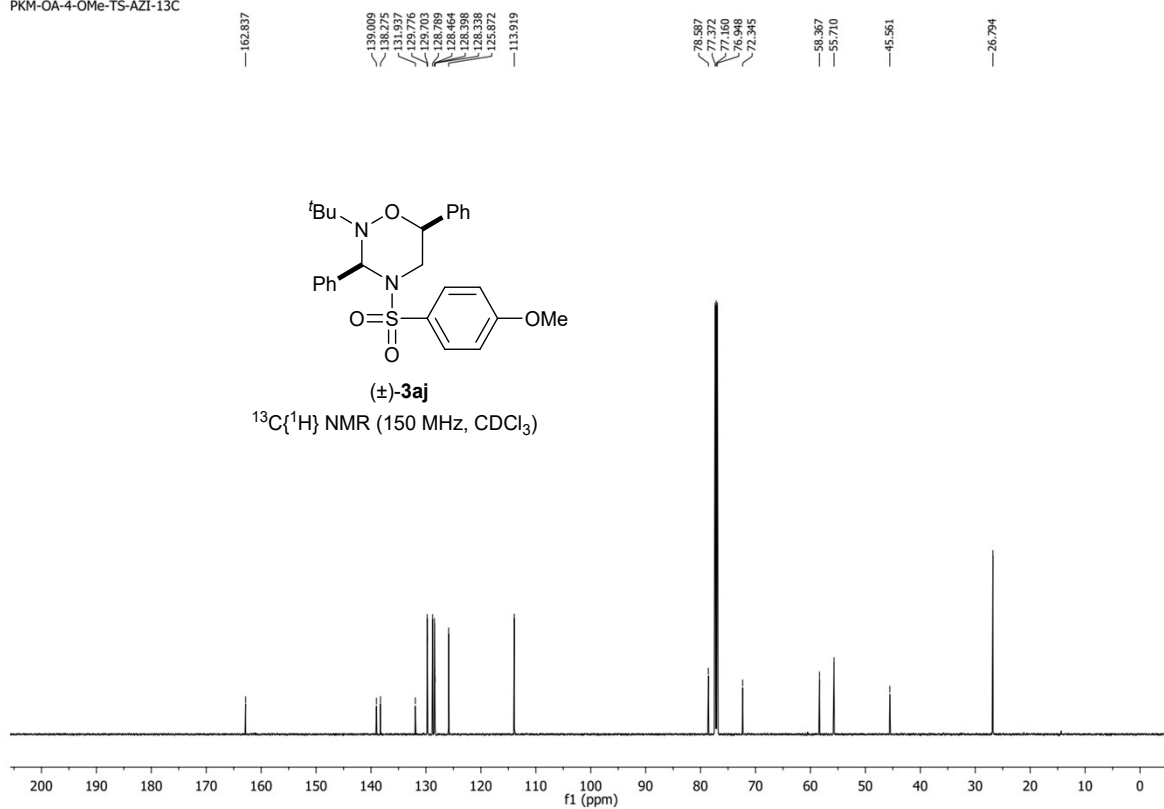

PKM-OA-N-NOSYL-AZI-1H

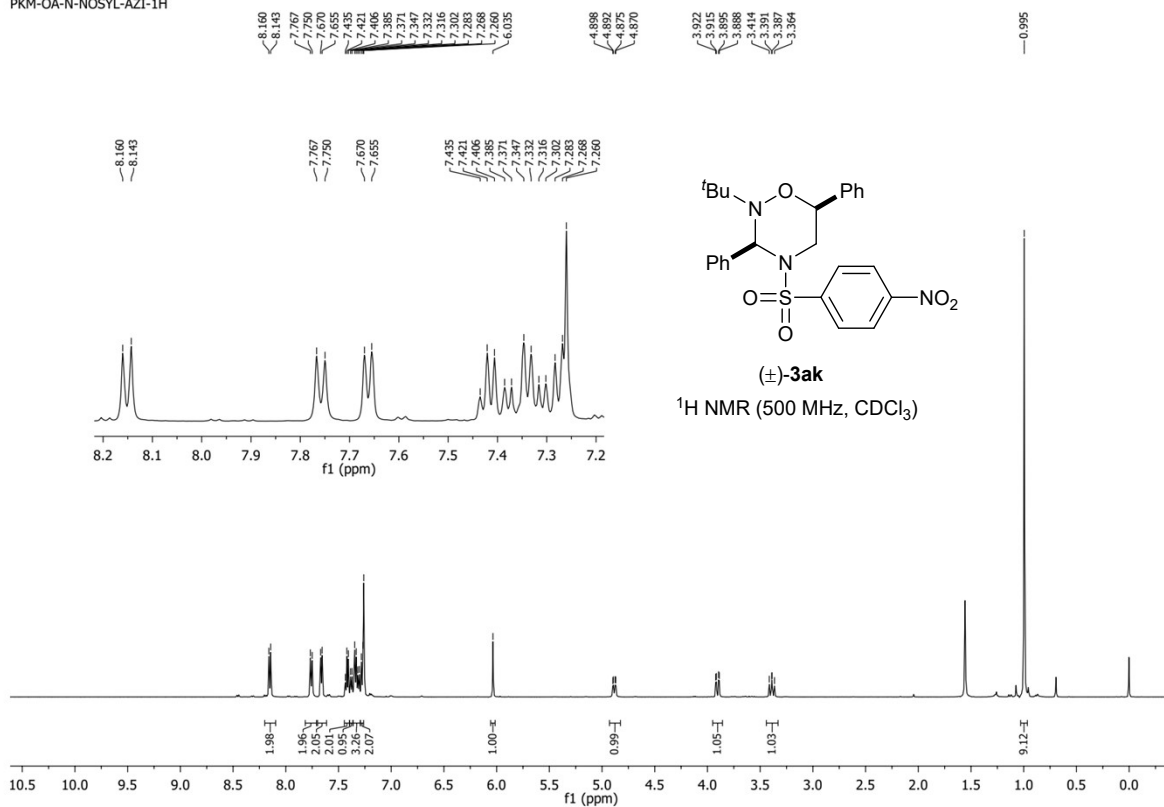

PKM-OA-N-NOSYL-AZI-13C

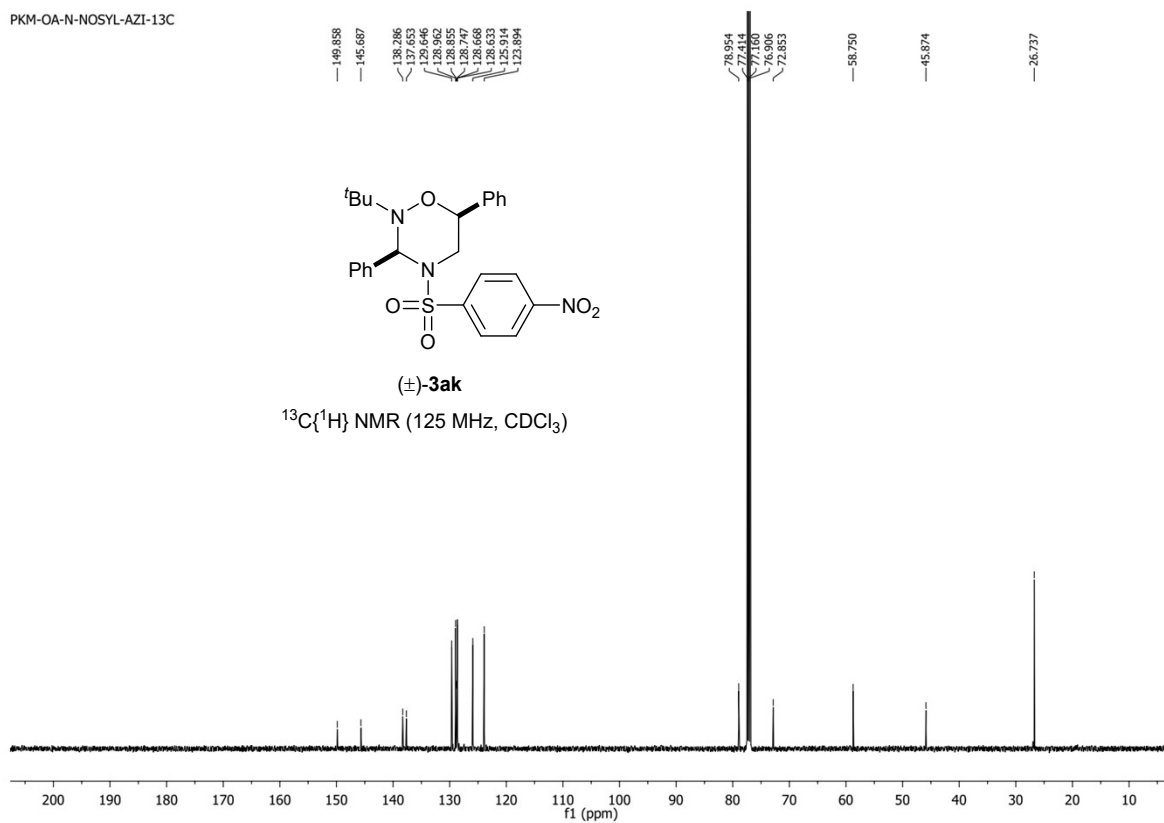

PKM-OA-2-NAPH-SUL-AZI-1H

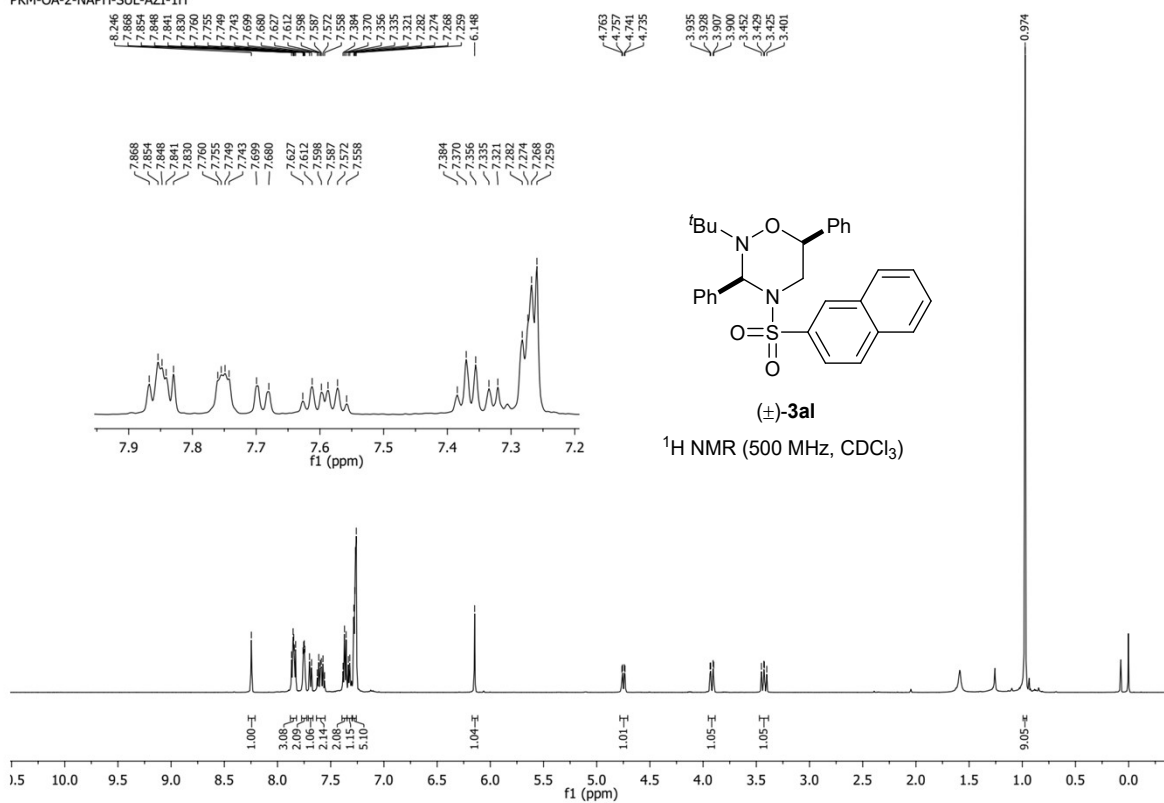

PKM-OA-2-NAPH-SUL-AZI-13C

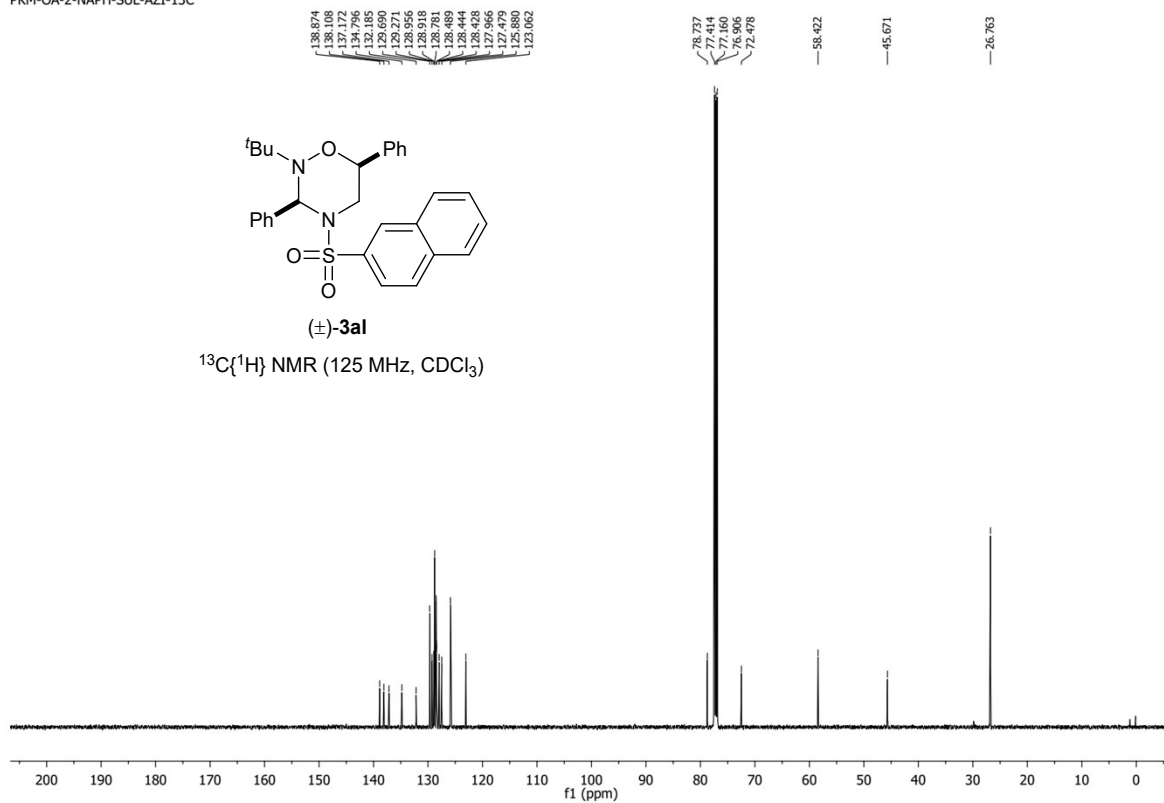

PKM-OA-THIO-AZI-1H

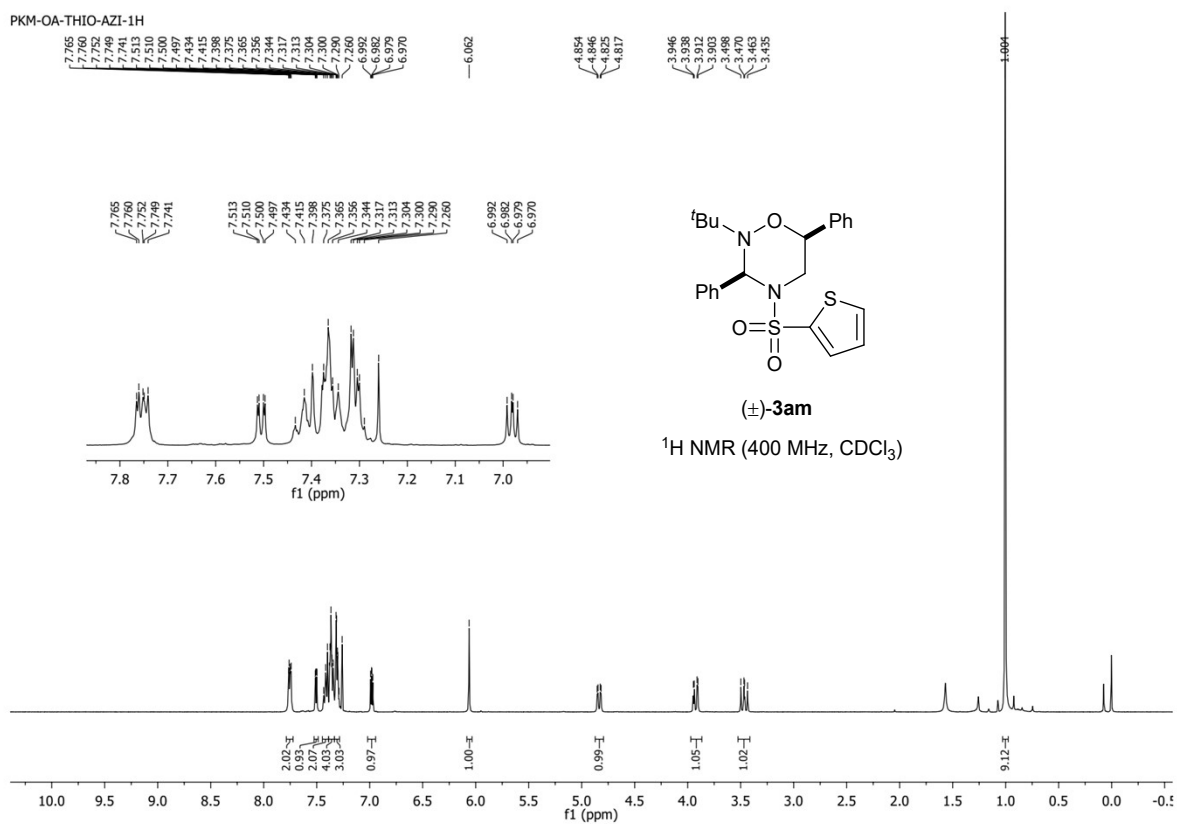

PKM-OA-THIO-AZI-13C

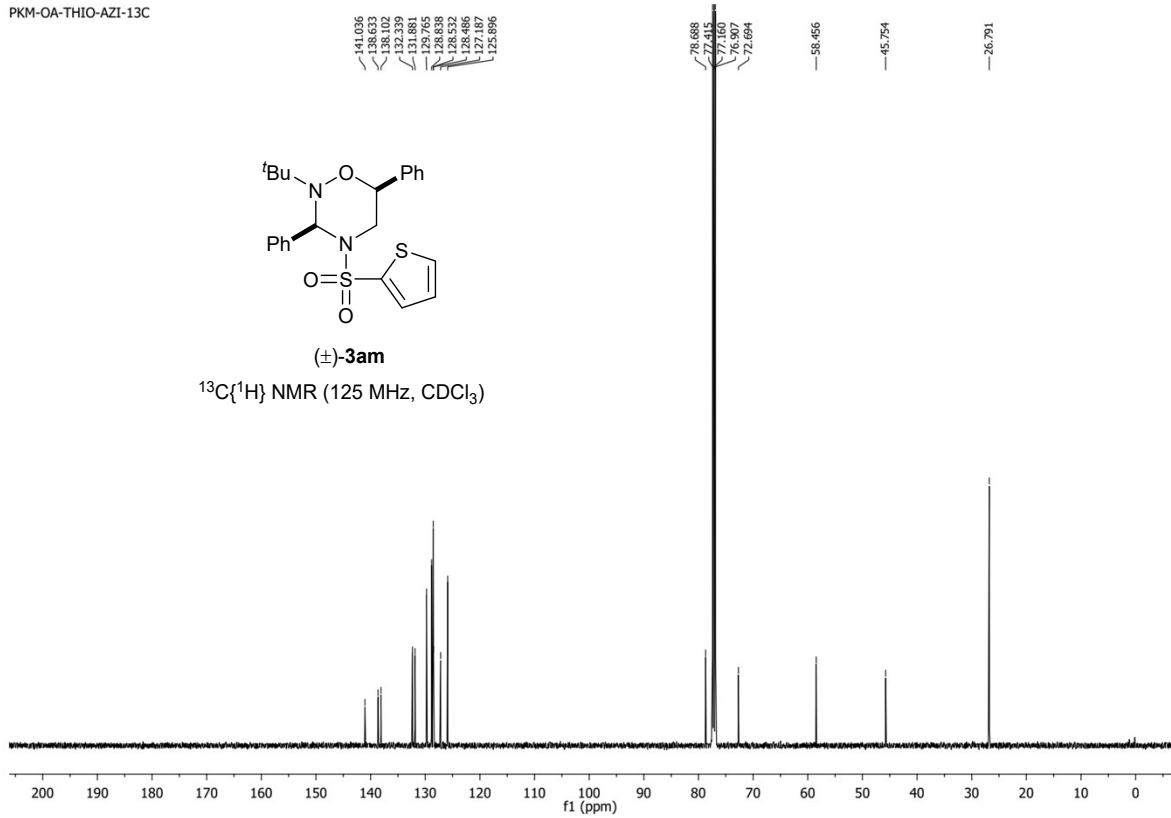

PKM-765-1H

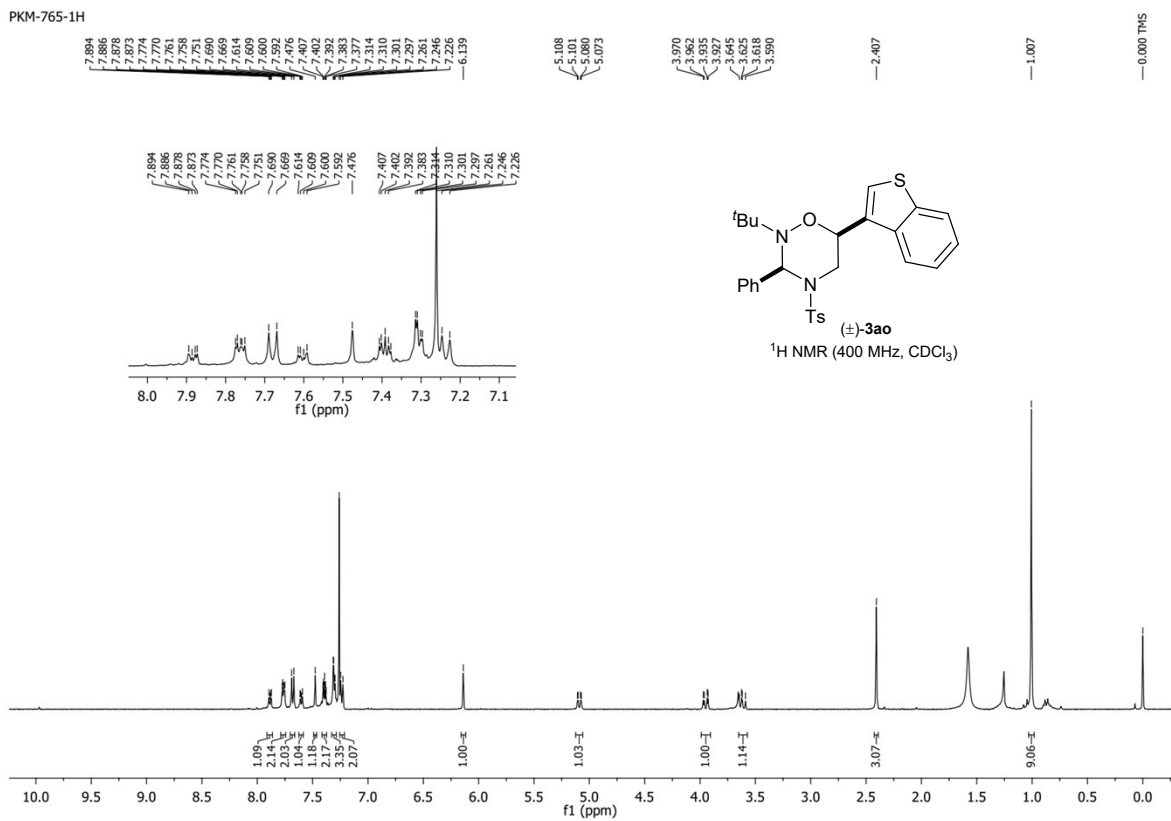

PKM-765-13C

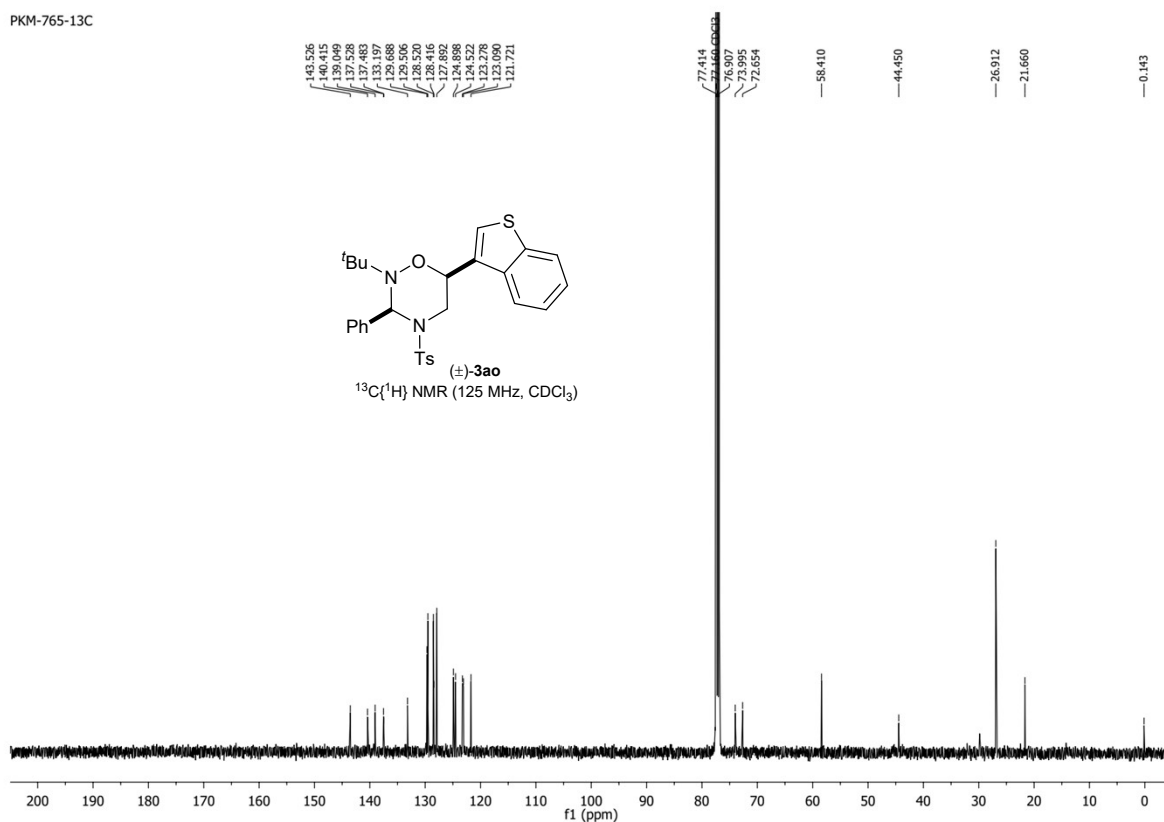

PKM-OA-CARV-AZI-1H

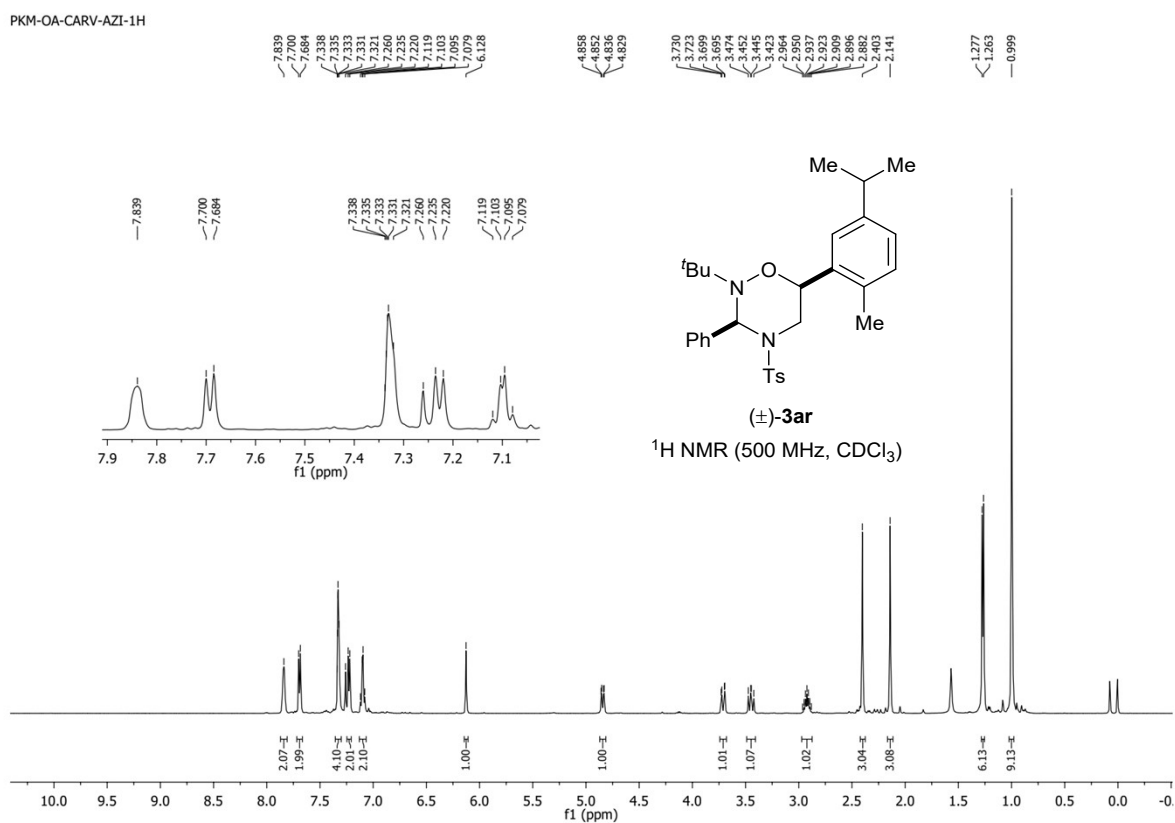

PKM-OA-CARV-AZI-13C

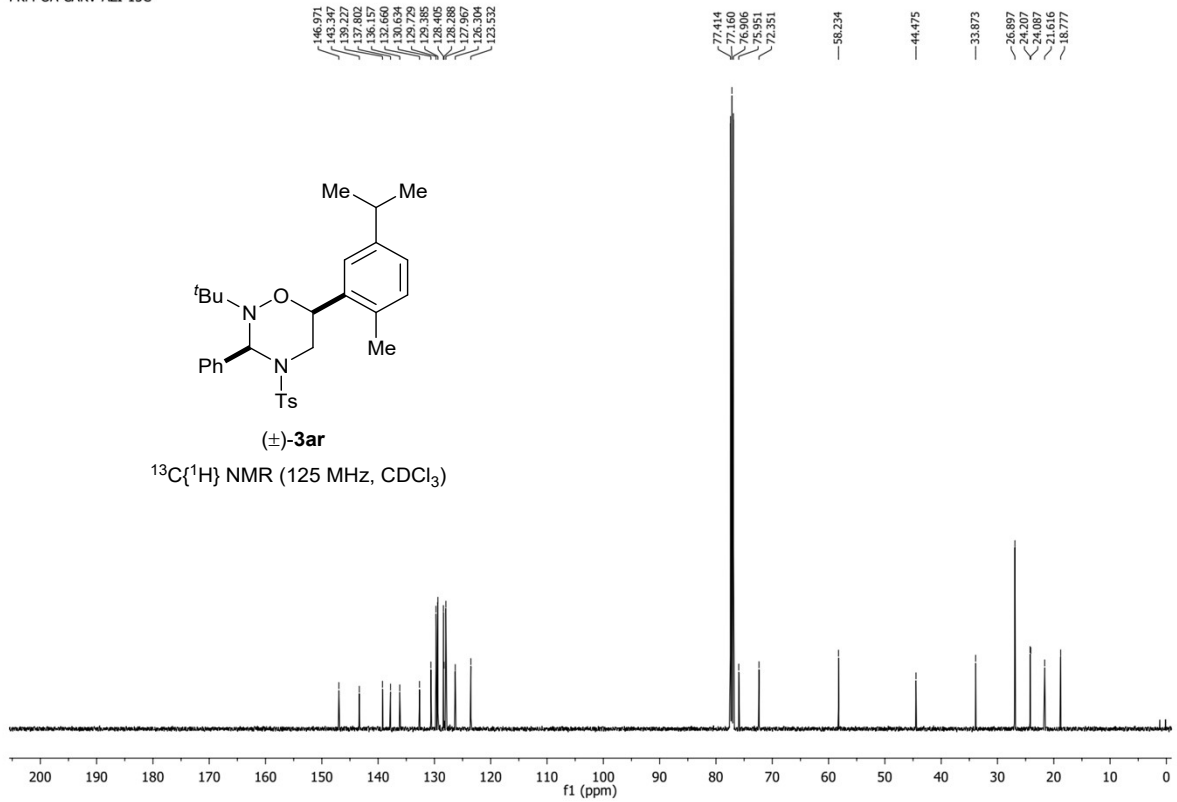

PKM-CELECOXIB-OA-AZI-1H

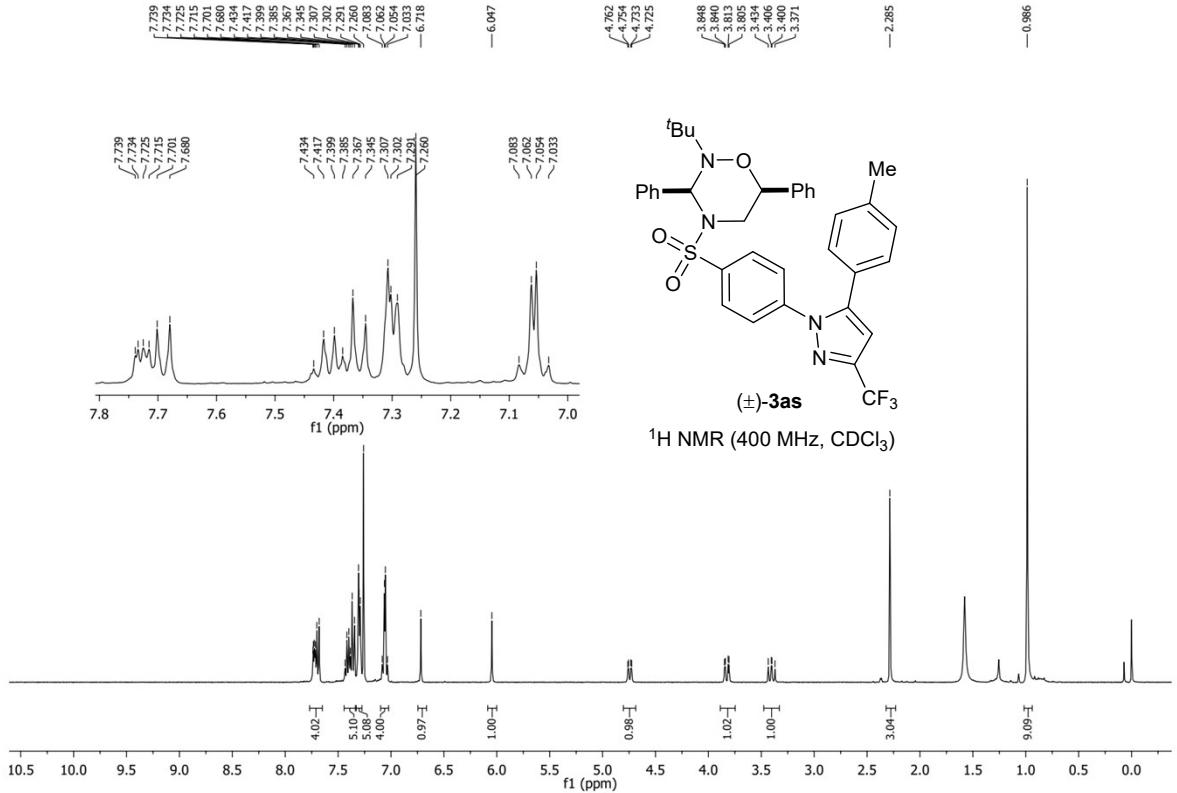

PKM-CELECOXIB-OA-AZI-13C

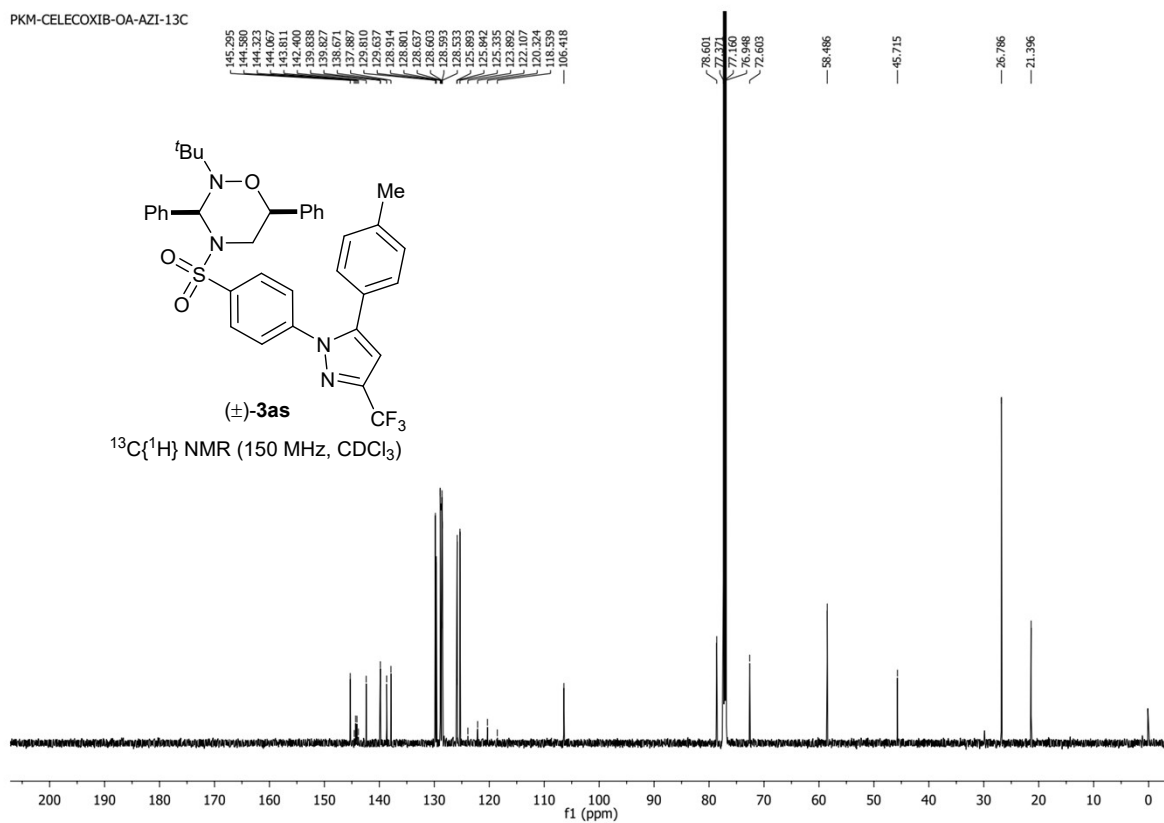

PKM-CELECOXIB-OA-AZI-19F

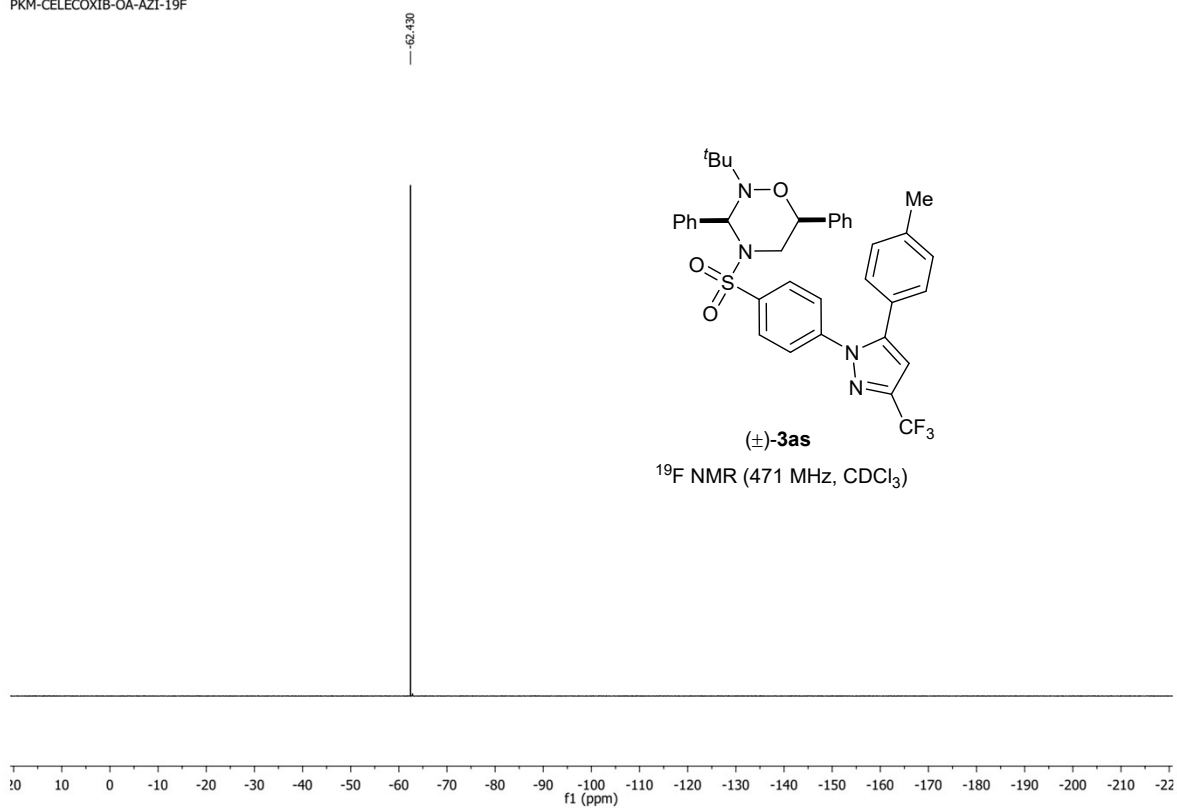

PKM-TBU-OA-DIOXOLO-AZI-1H

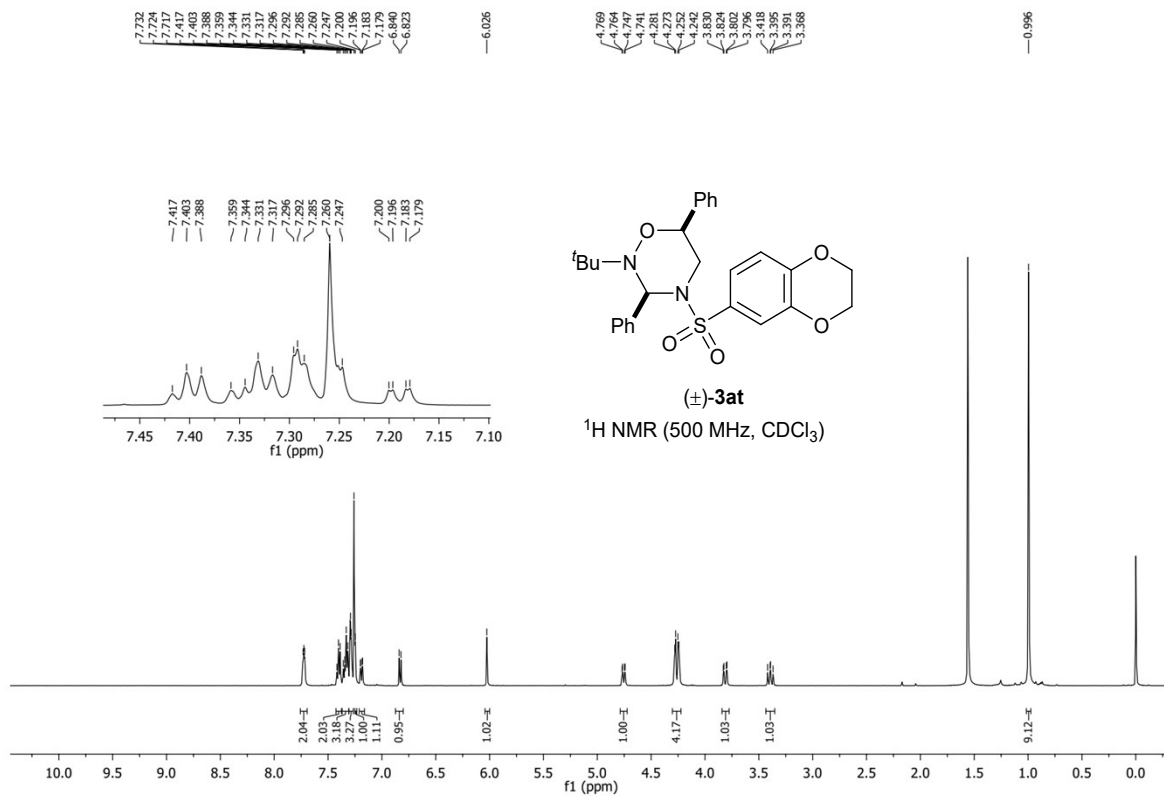

PKM-OA-DIOXOLO-AZI-13C

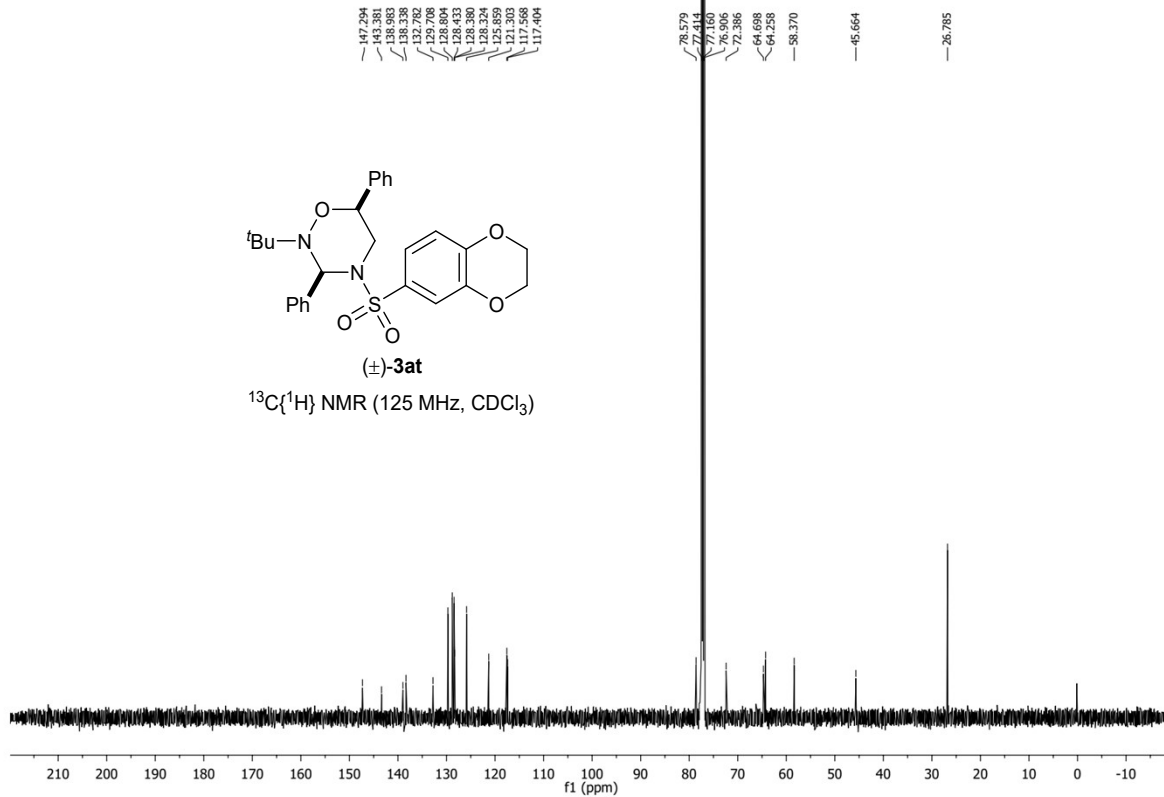

PKM-3Br-OA-AZI-1H

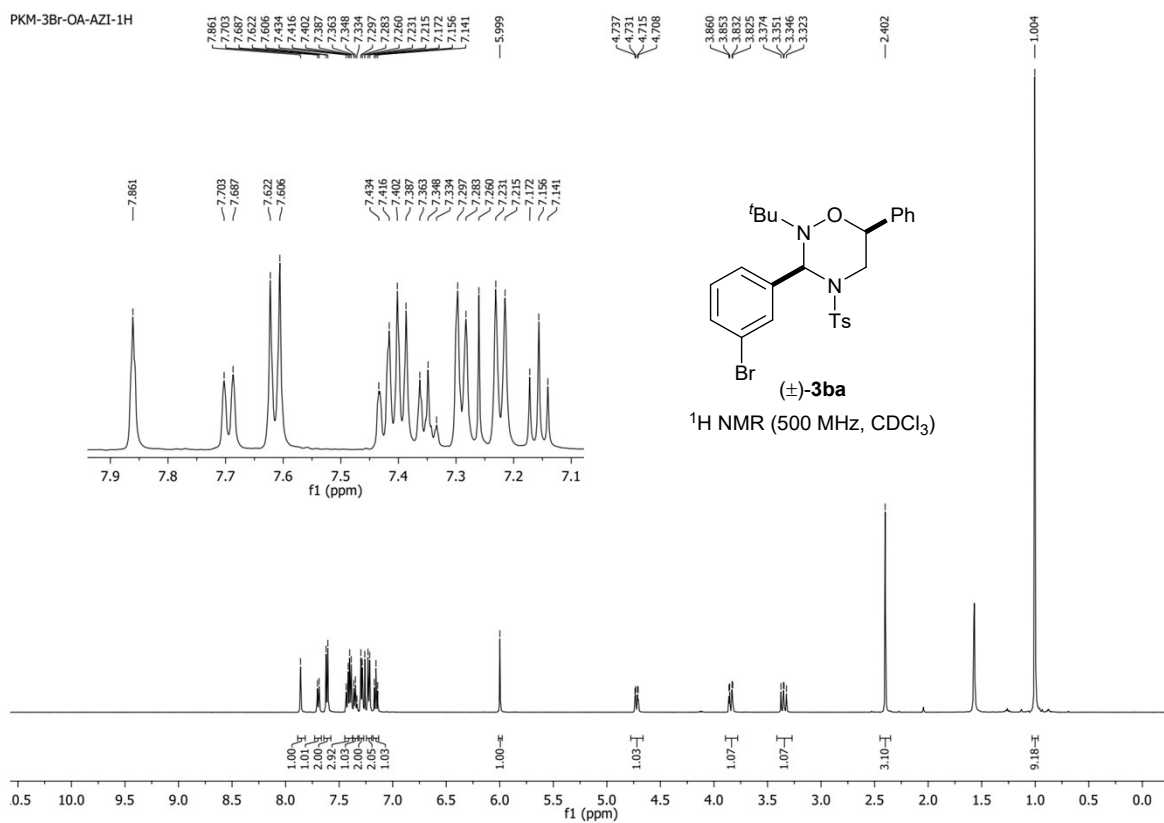

PKM-3Br-OA-AZI-13C

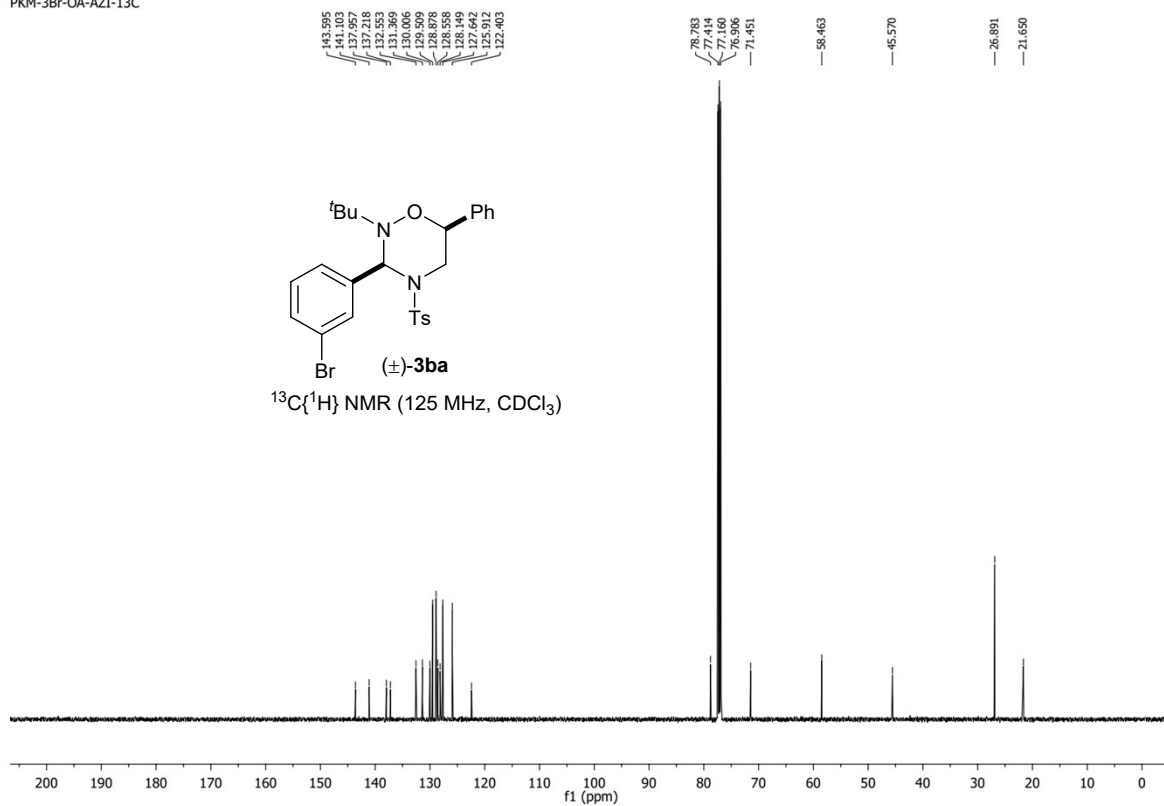

PKM-3-Me-OA-AZI-1H

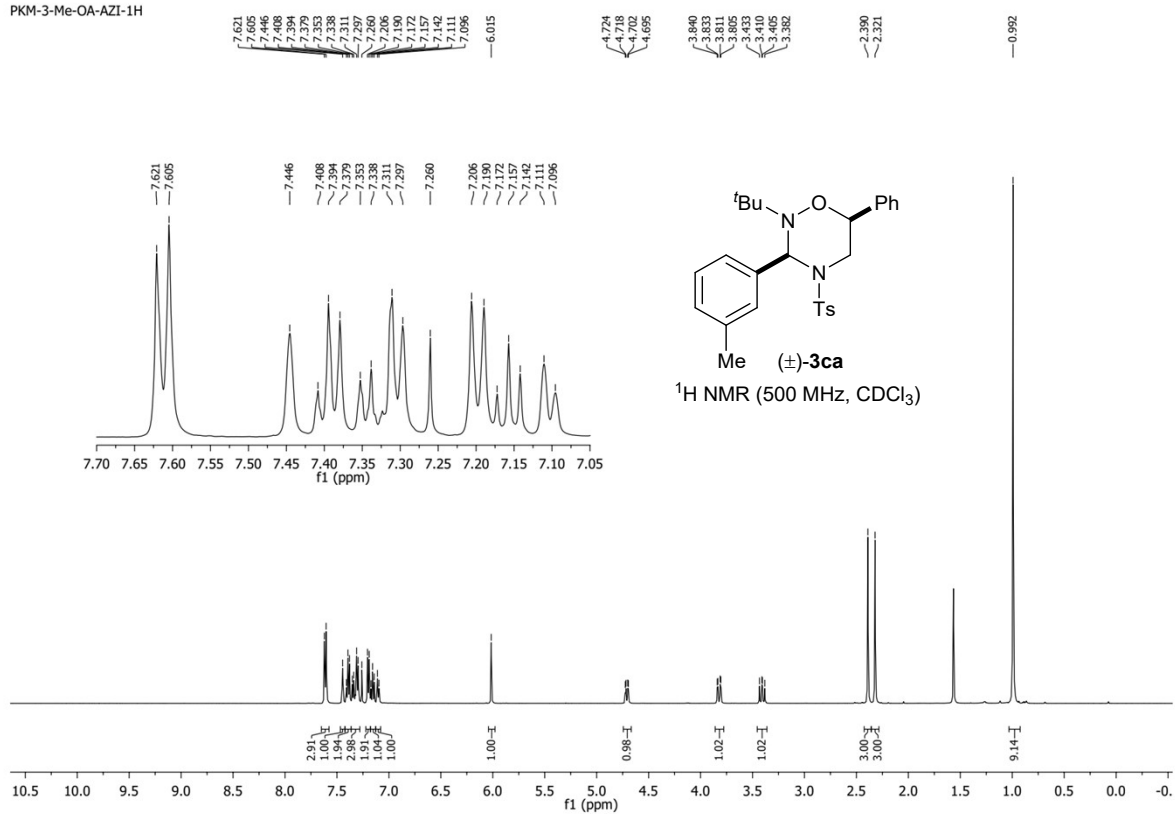

PKM-3-Me-OA-AZI-13C

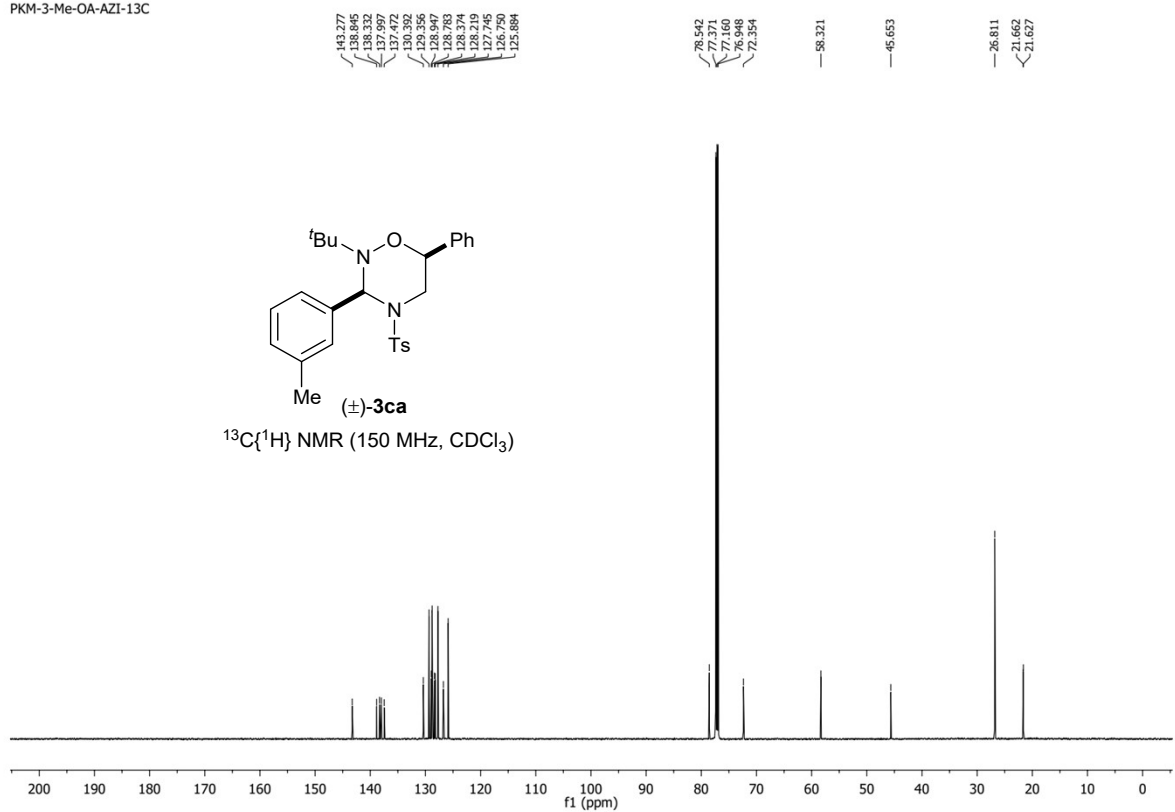

PKM-3CF3-OA-AZI-1H

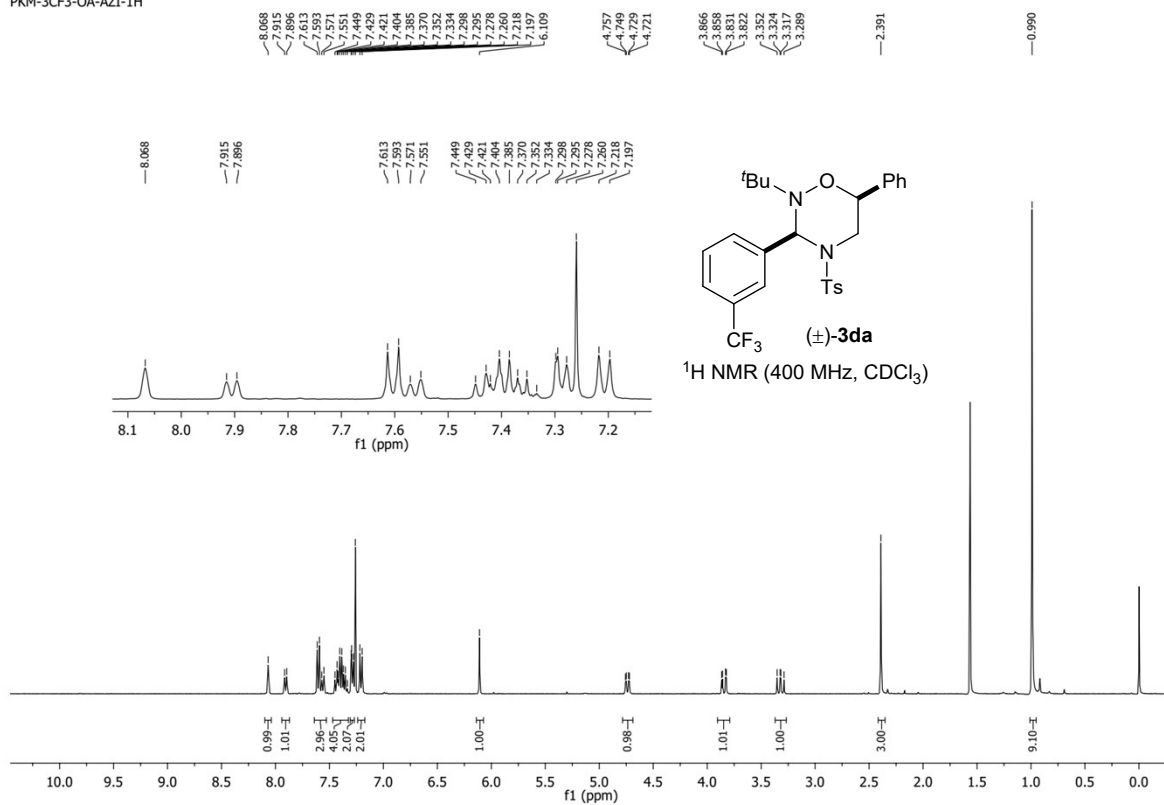

PKM-3CF3-OA-AZI-13C

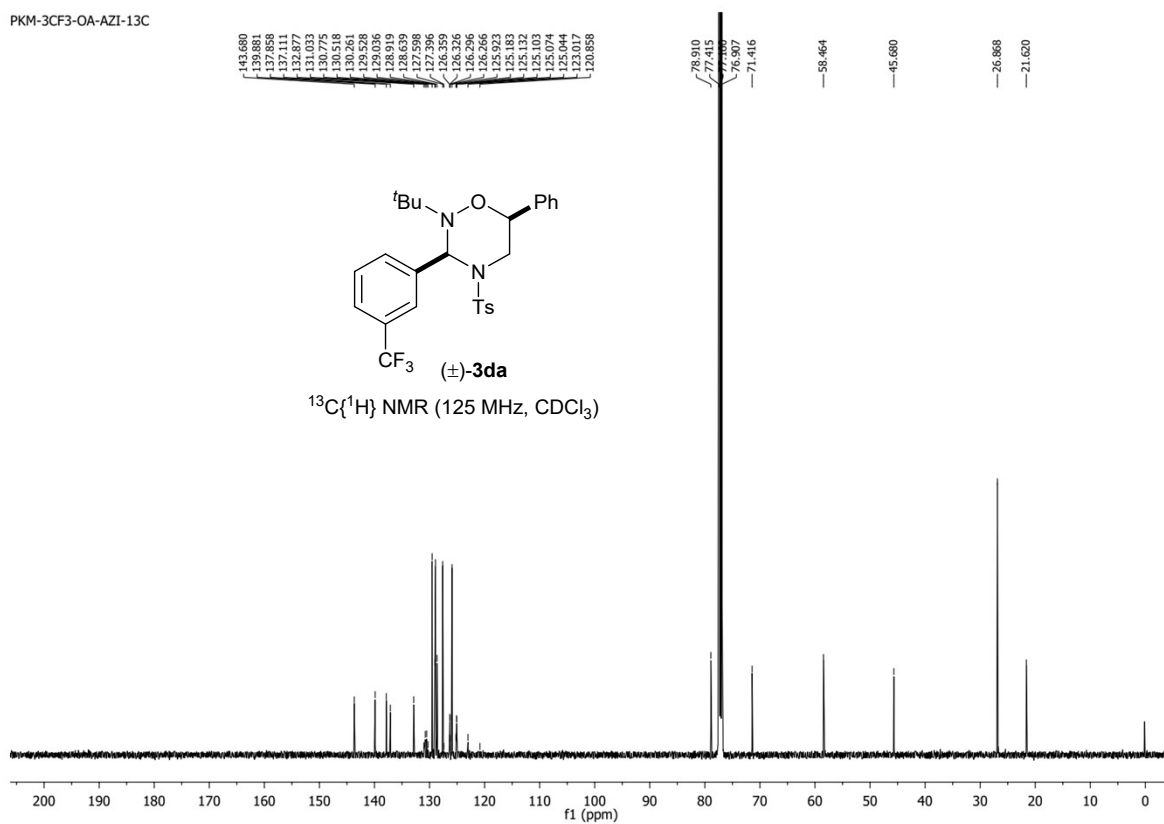

PKM-3CF3-OA-AZI-19F

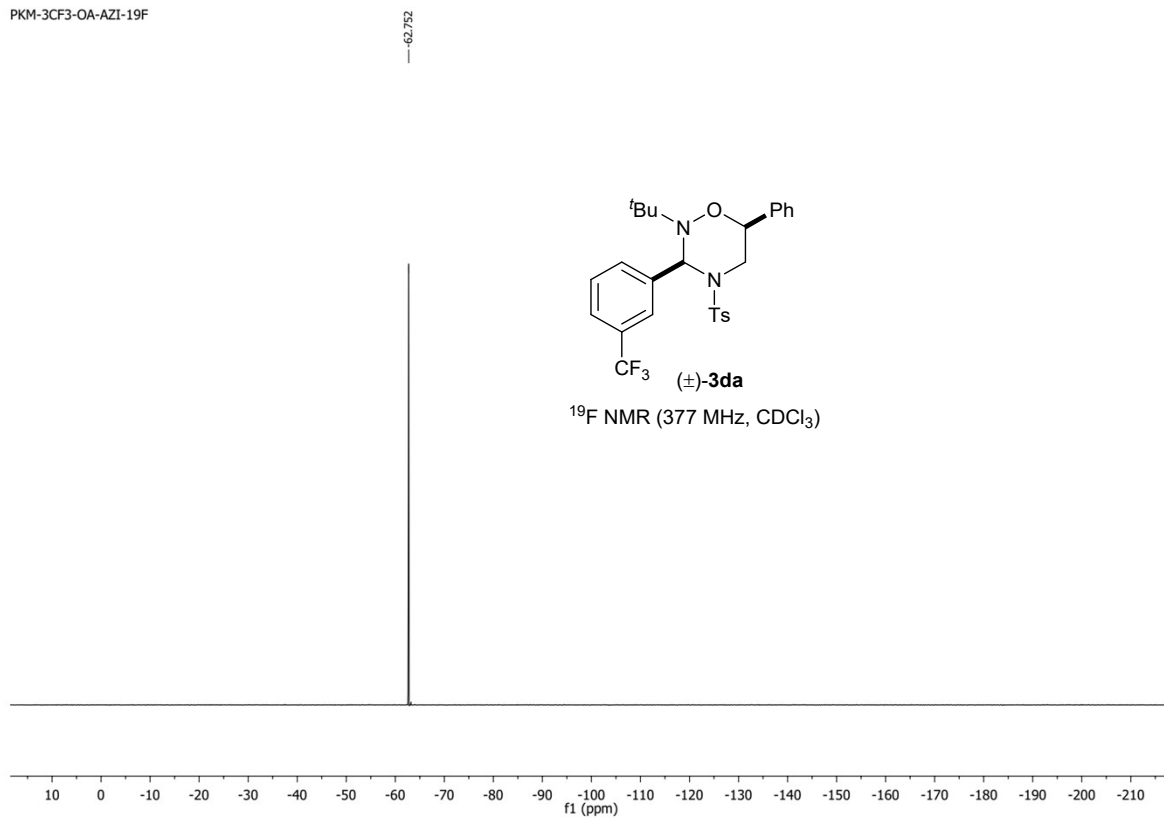

PKM-4Br-OA-AZI-1H

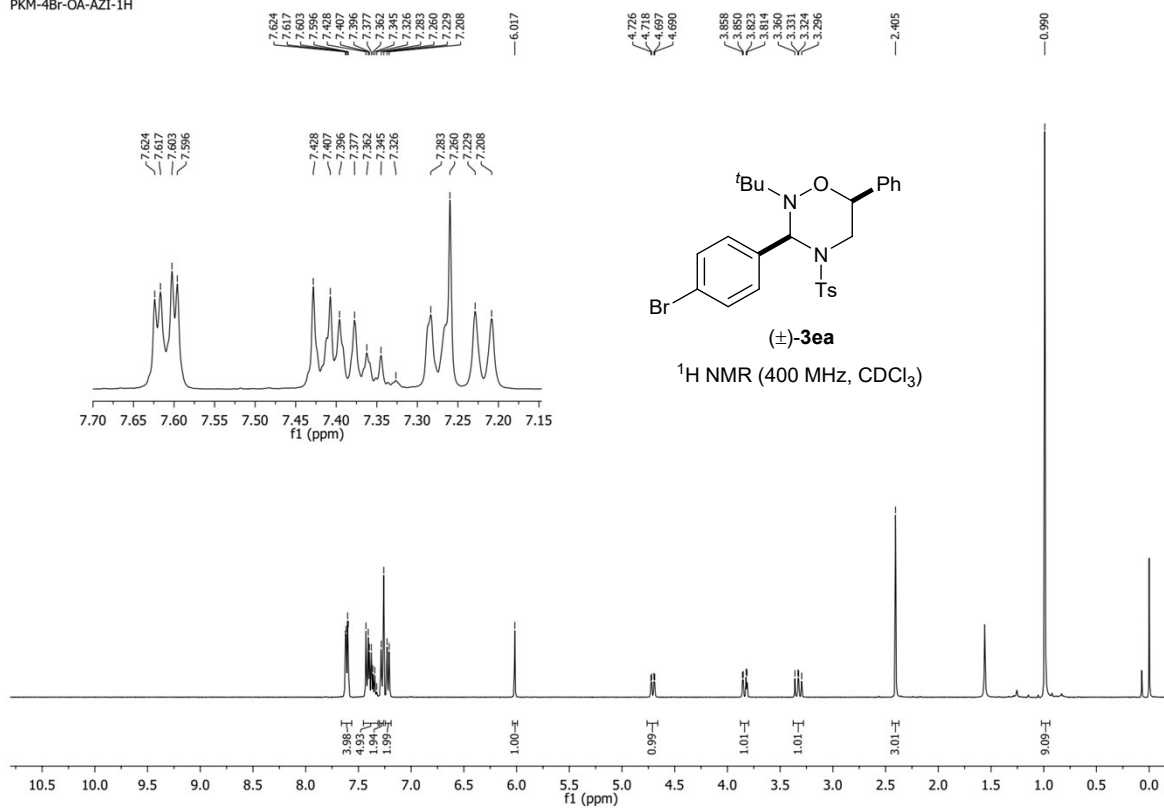

PKM-4Br-OA-AZI-13C

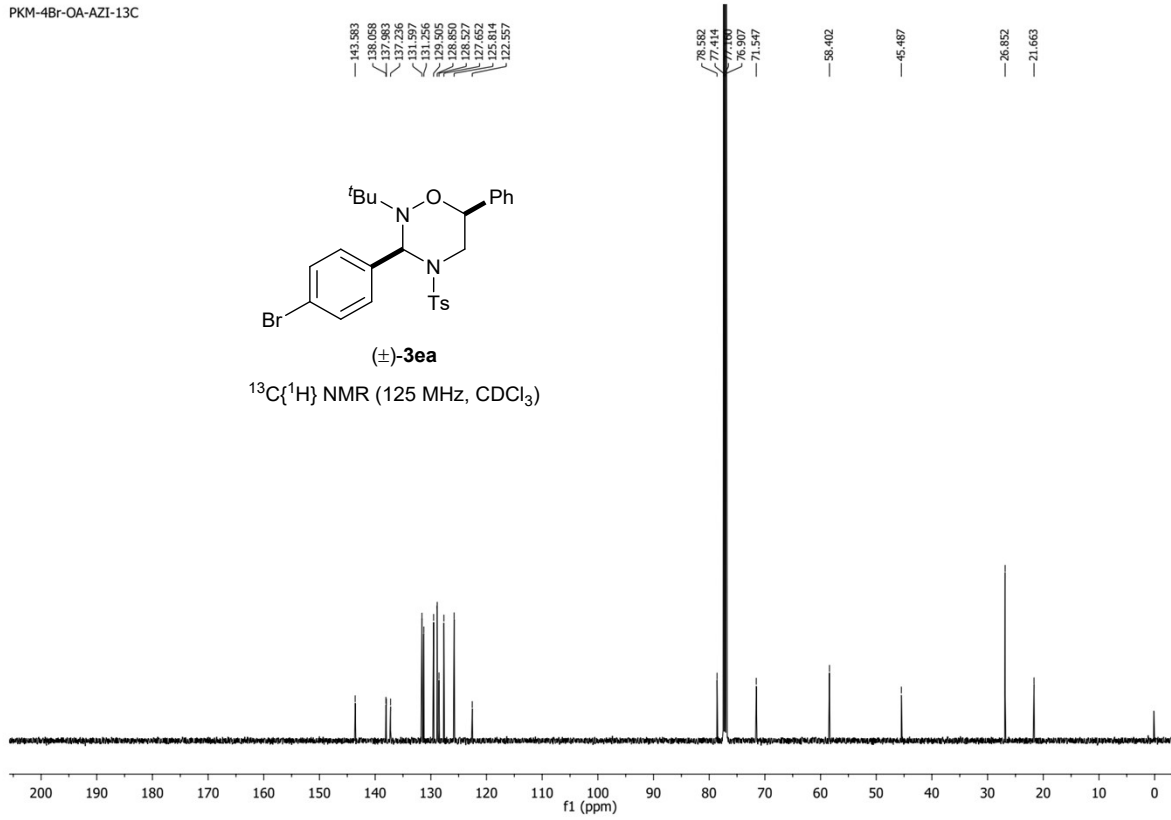

PKM-4Me-OA-AZI-1H

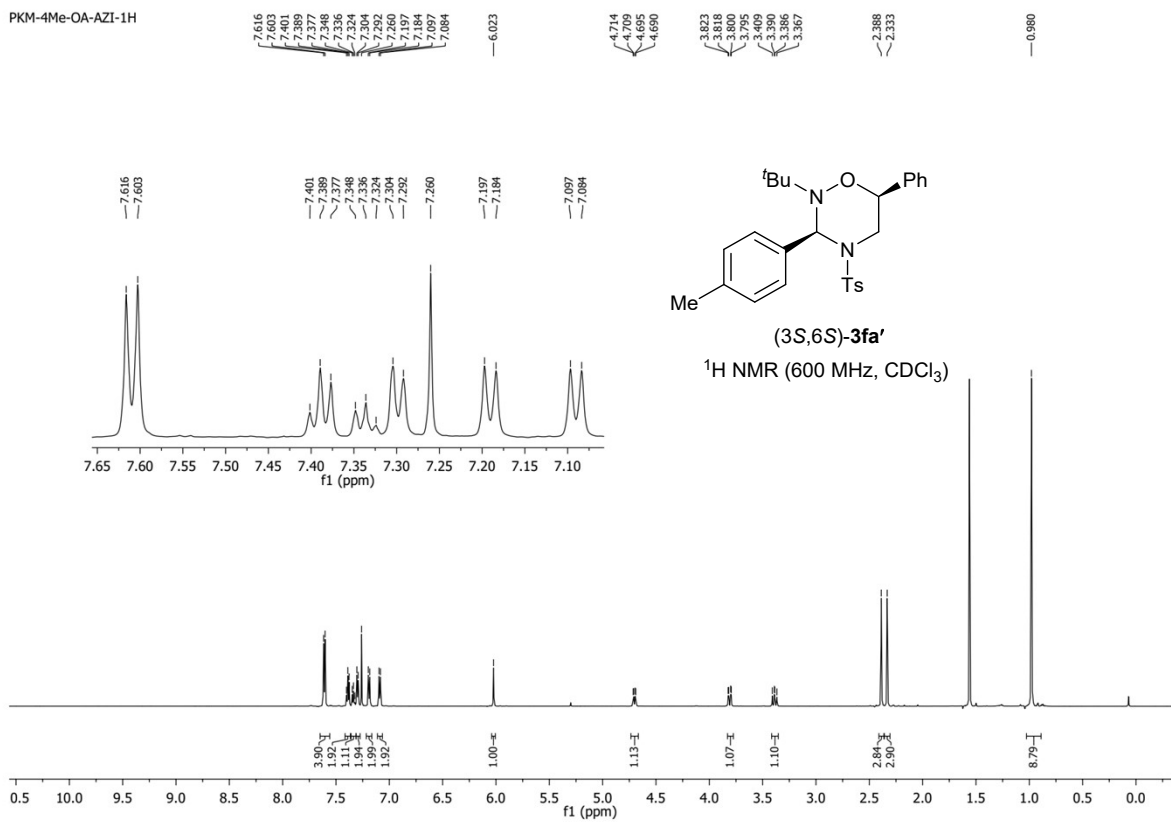

PKM-4Me-OA-AZI-13C

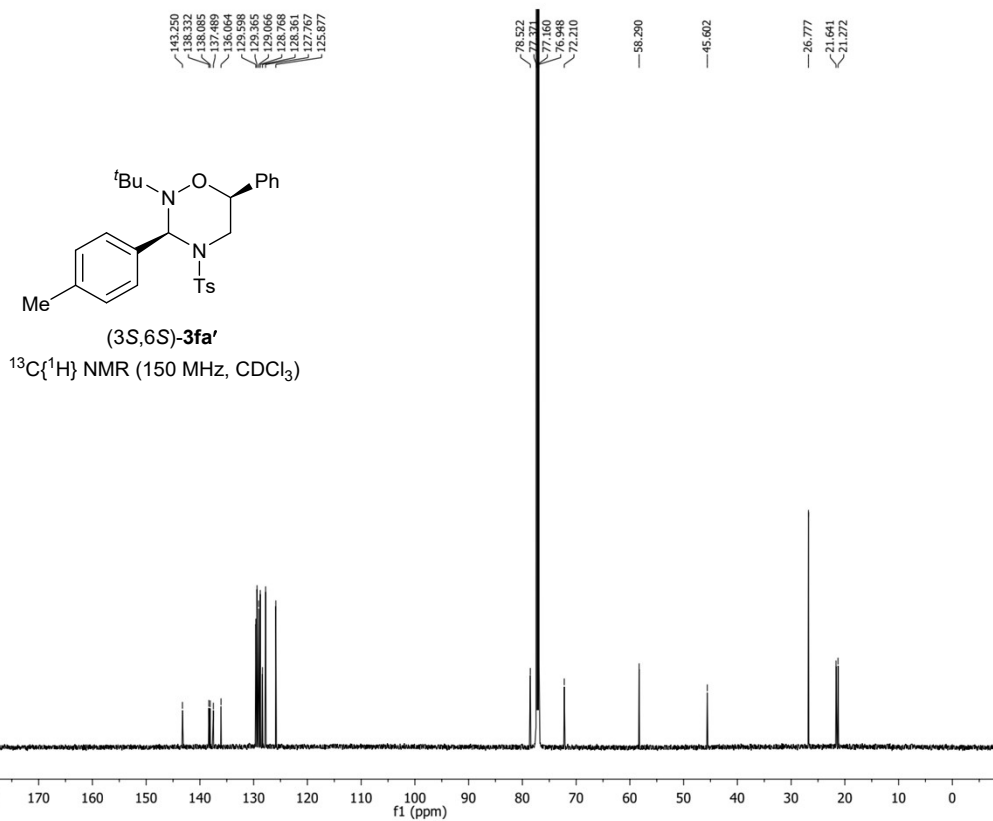

PKM-4OMe-tBu-OA-AZI-1H

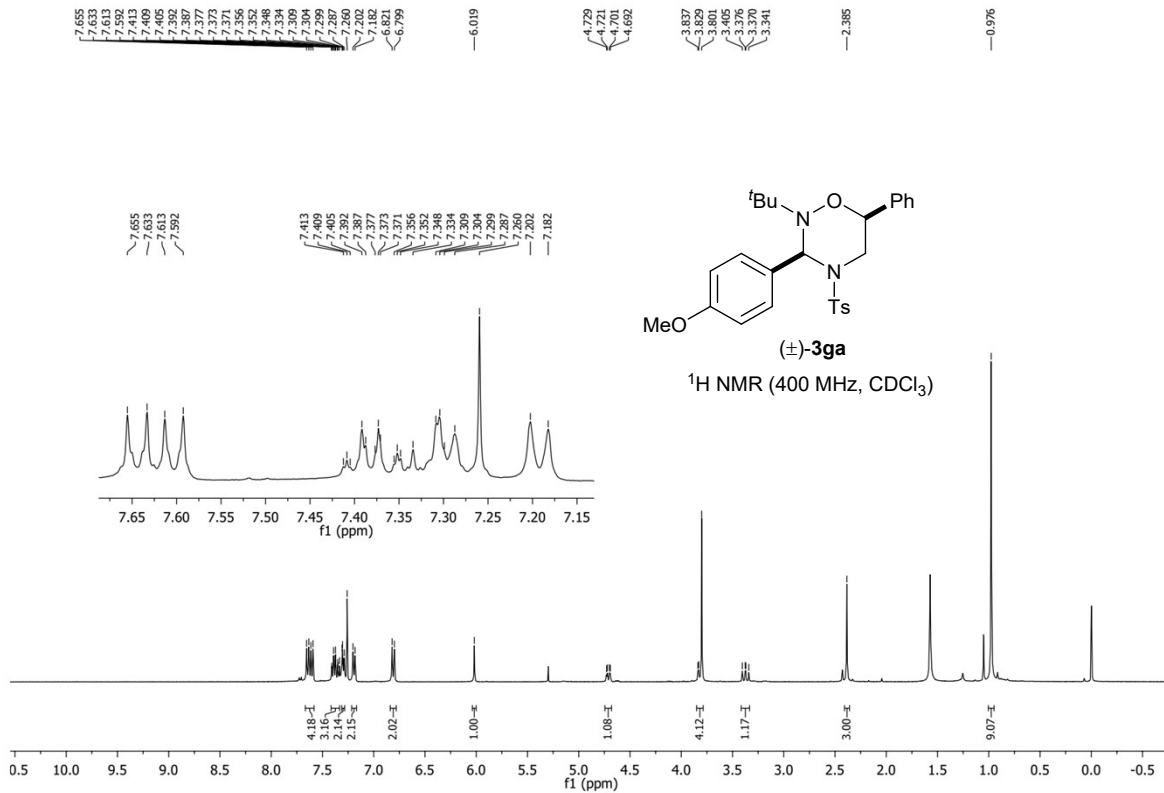

PKM-4-OMe-tBu-OA-AZI-13C

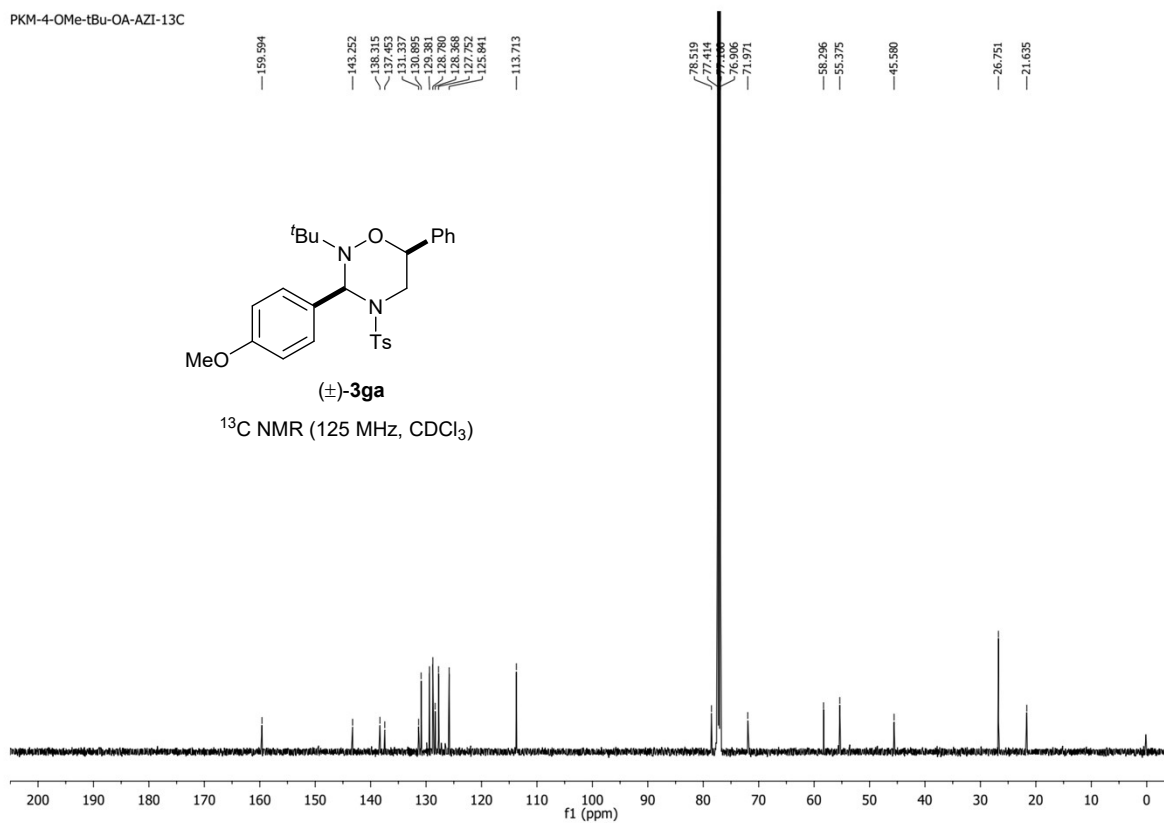

PKM-tBu-OA-AZI-1H

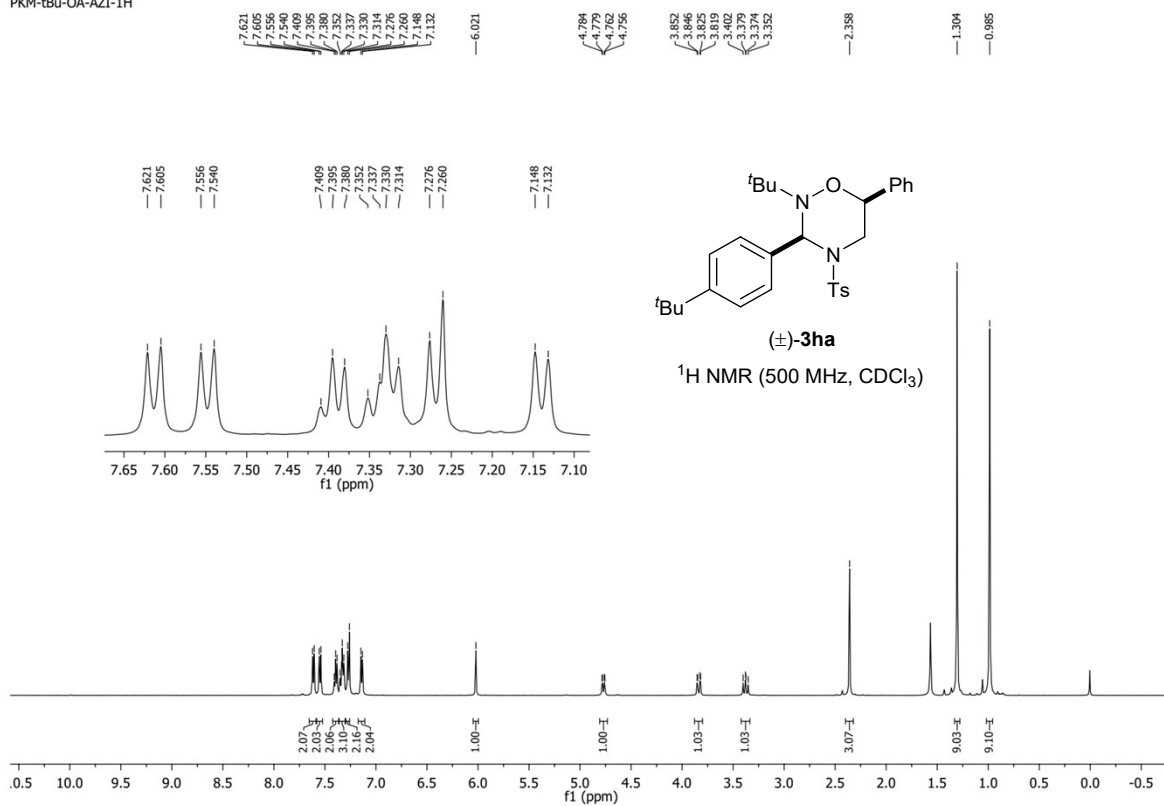

PKM-tBu-OA-AZI-13C

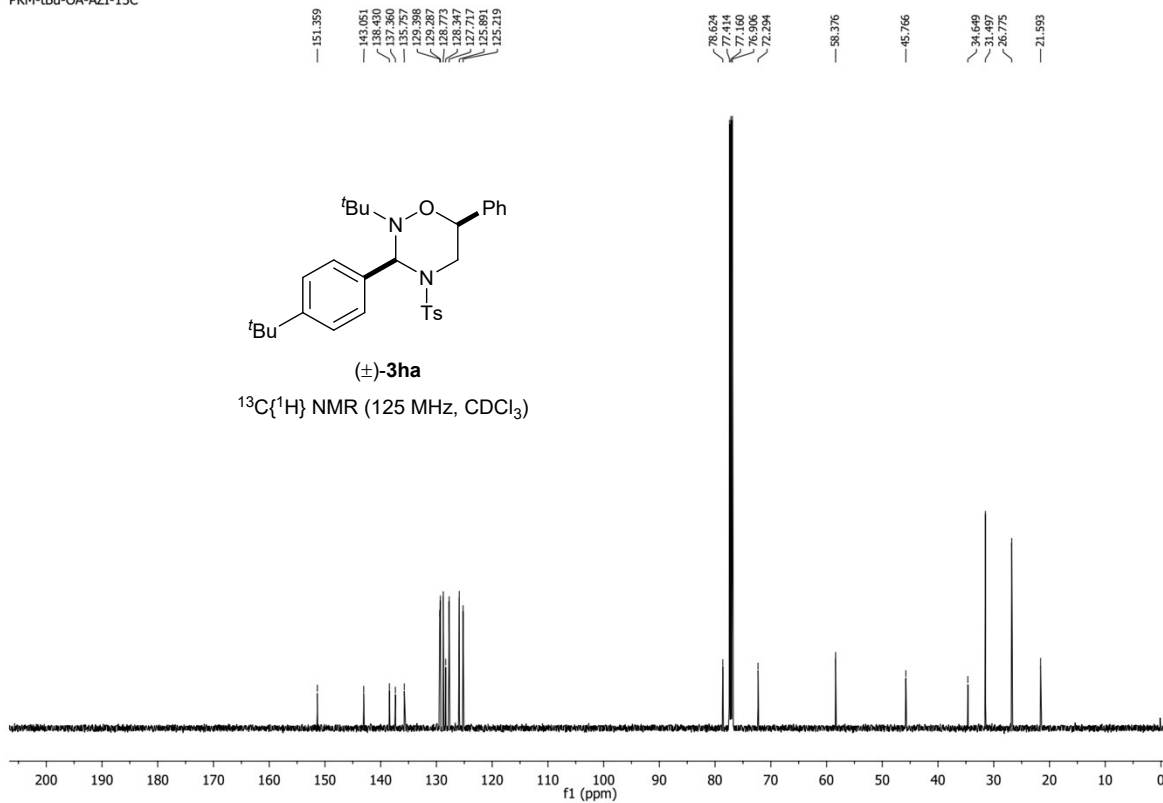

PKM-CUMENE-OA-AZI-1H

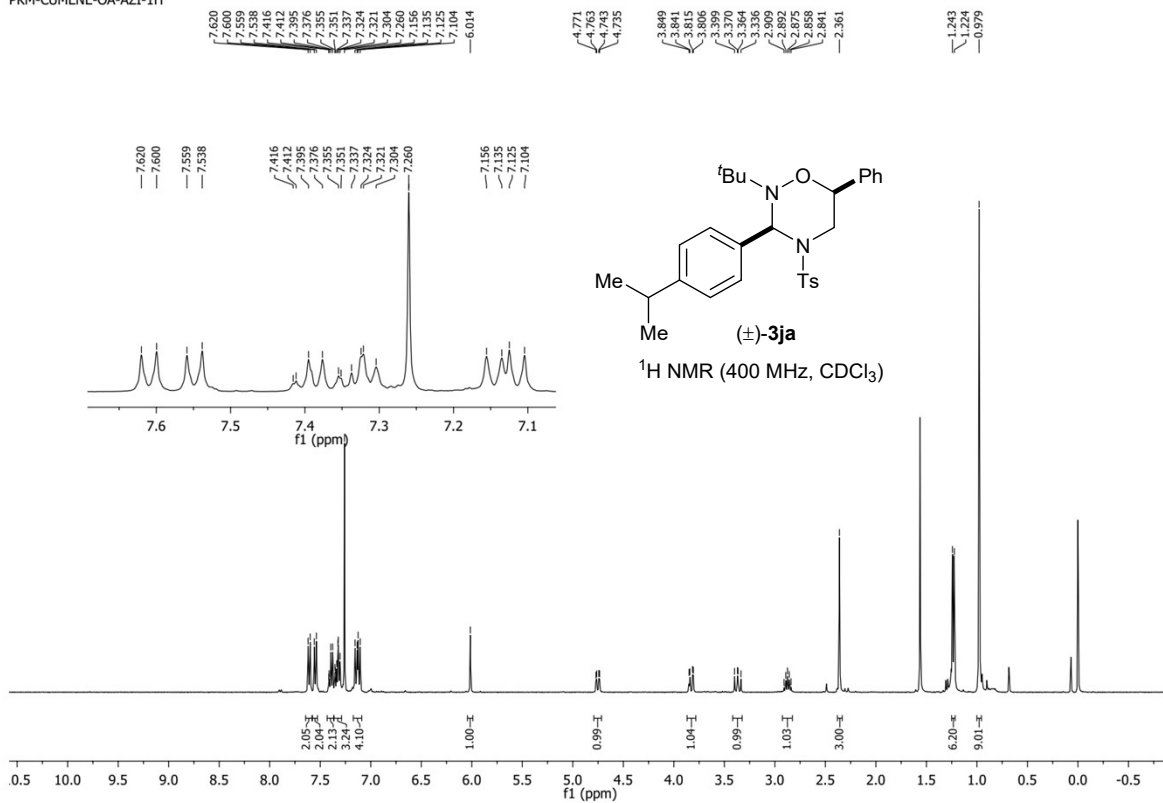

PKM-CUMENE-OA-AZI-13C

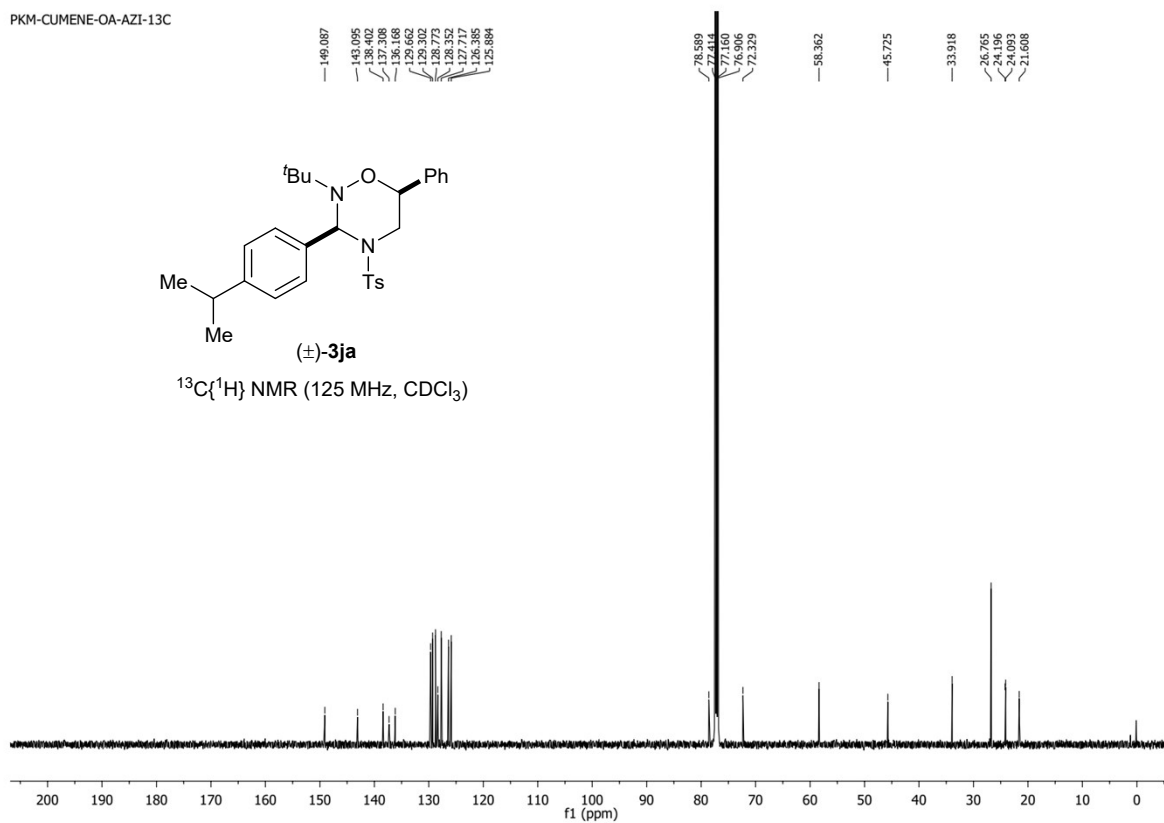

PKM-1-NAPHTHYL-OA-AZI-1H

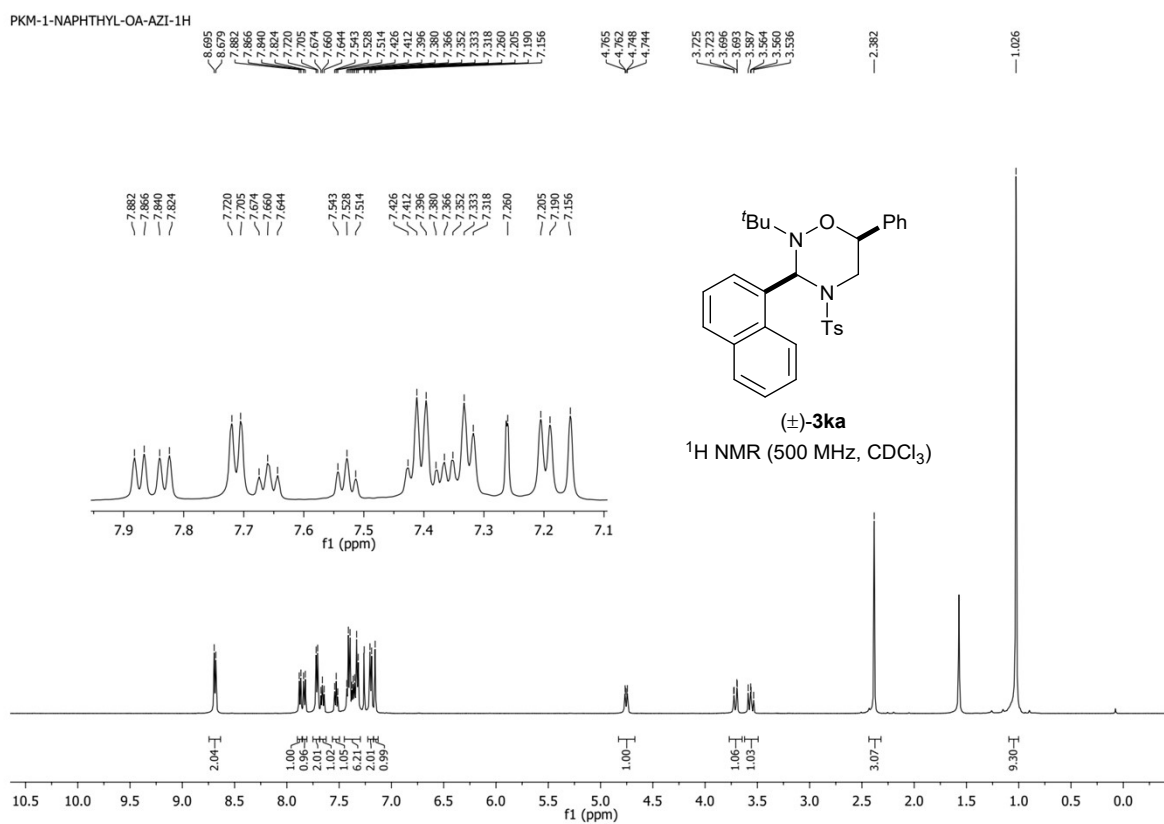

PKM-1-NAPHTHYL-OA-AZI-13C

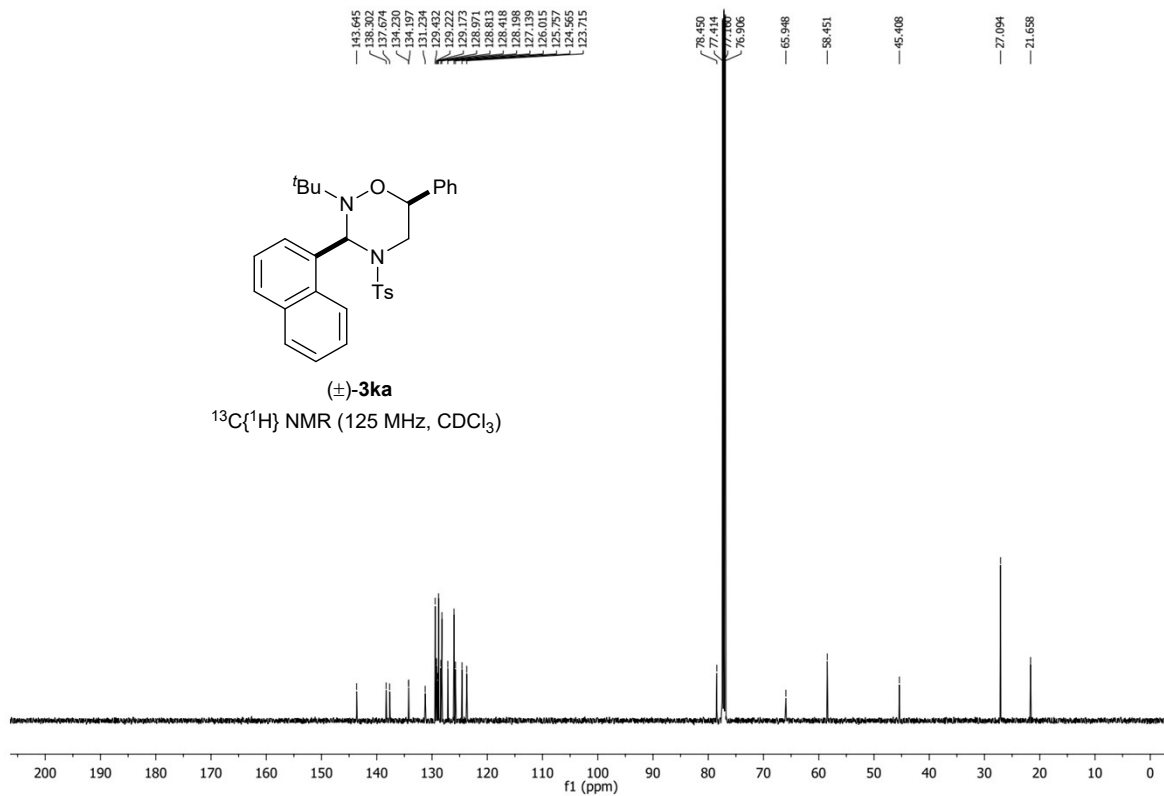

PKM-FUR-OA-AZI-1H

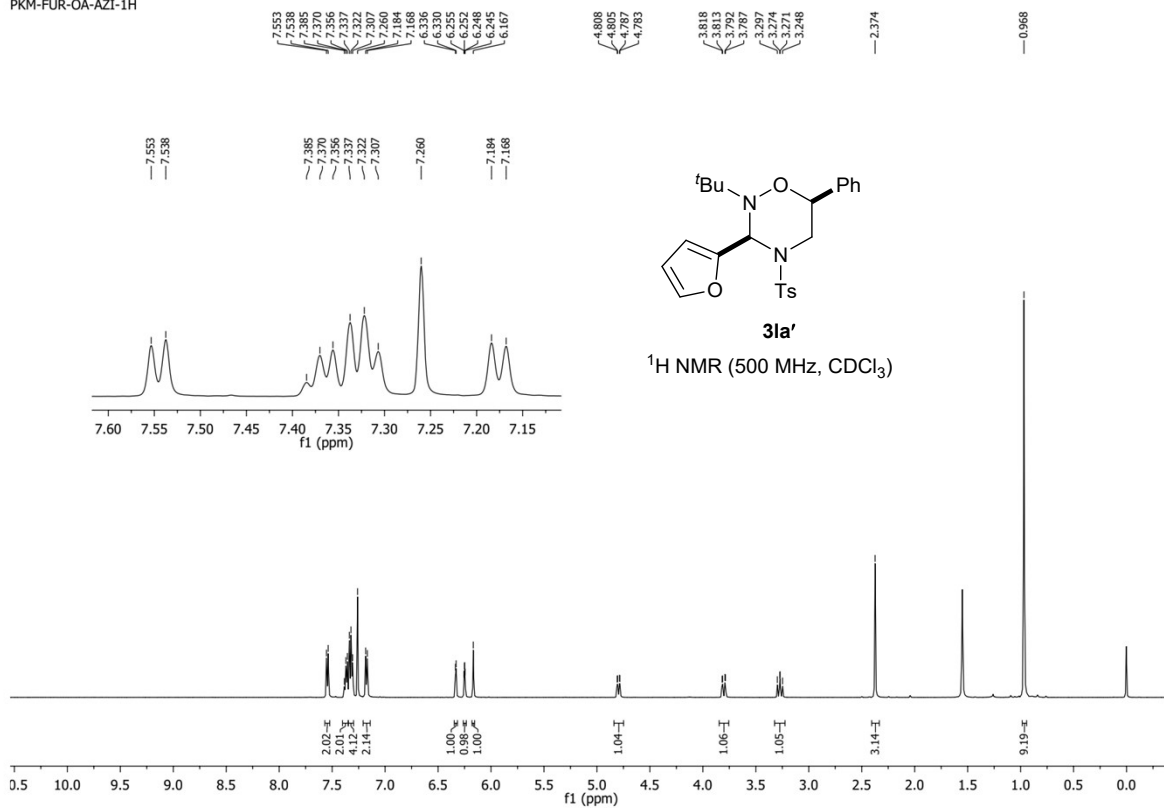

PKM-FUR-OA-AZI-13C

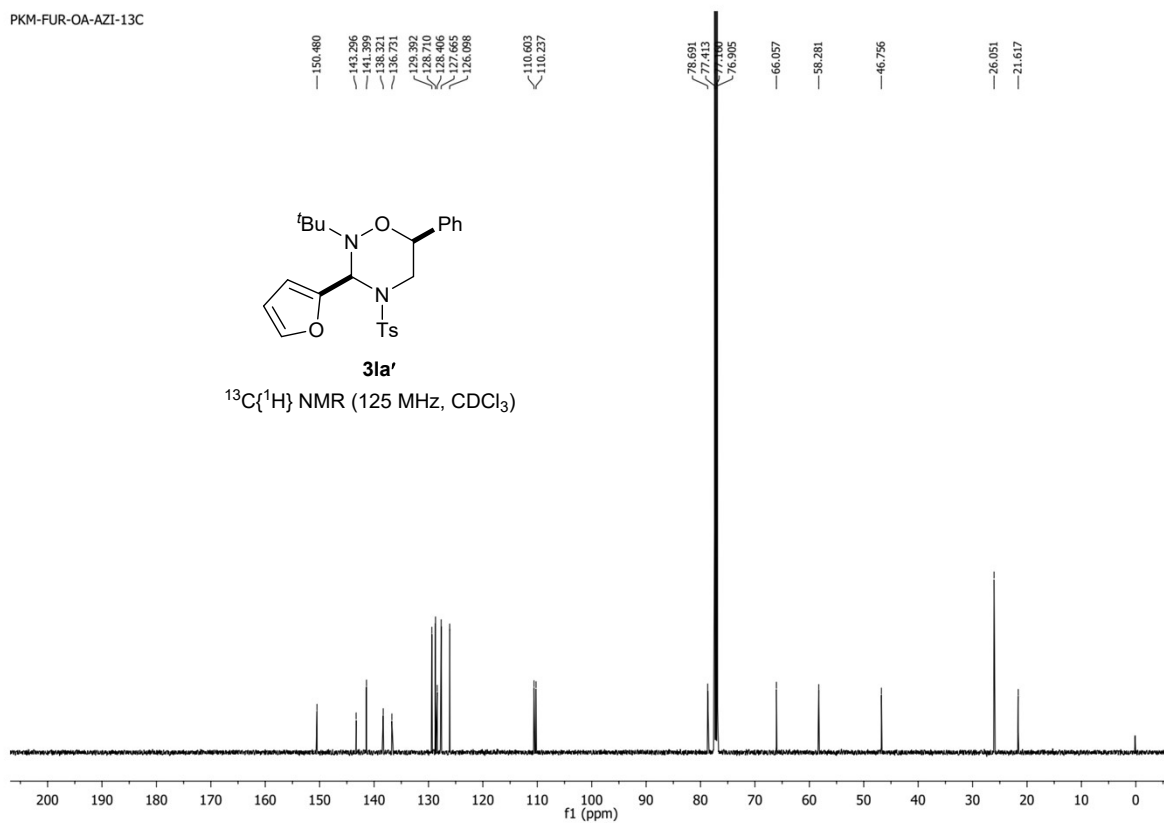

PKM-IPr-OA-AZI-1H

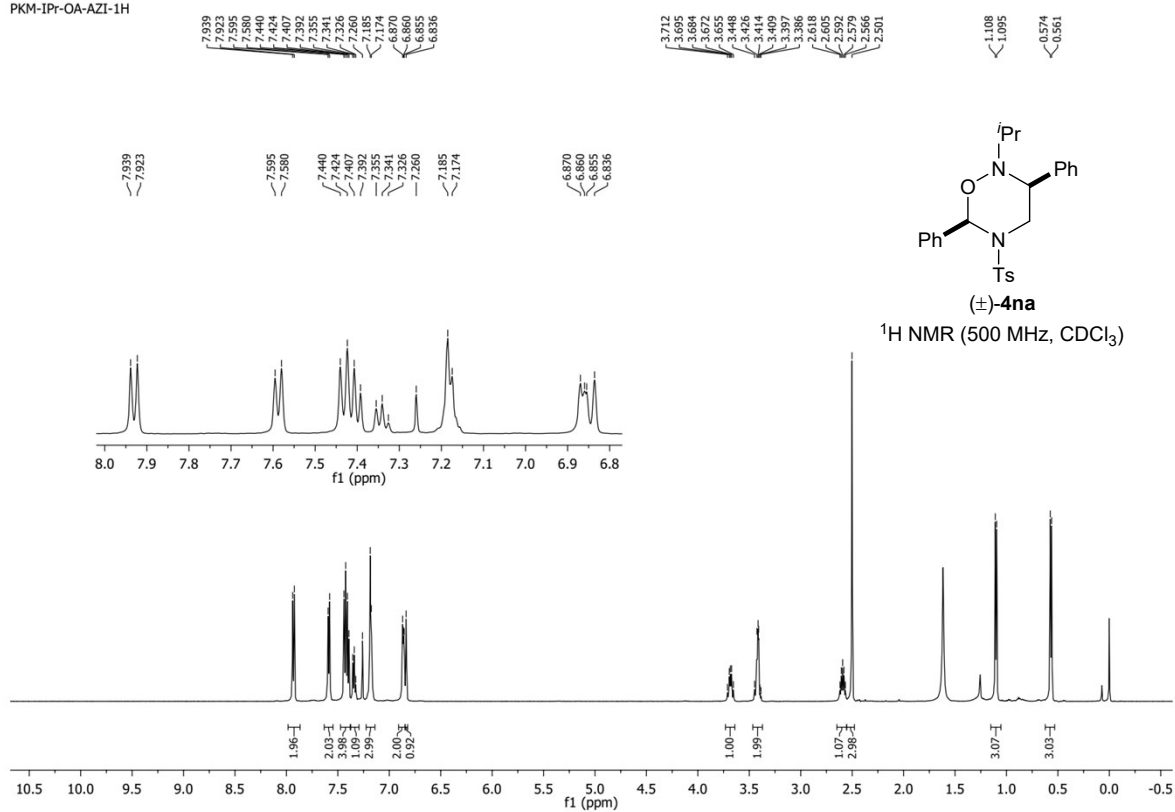

PKM-IPr-OA-AZI-13C

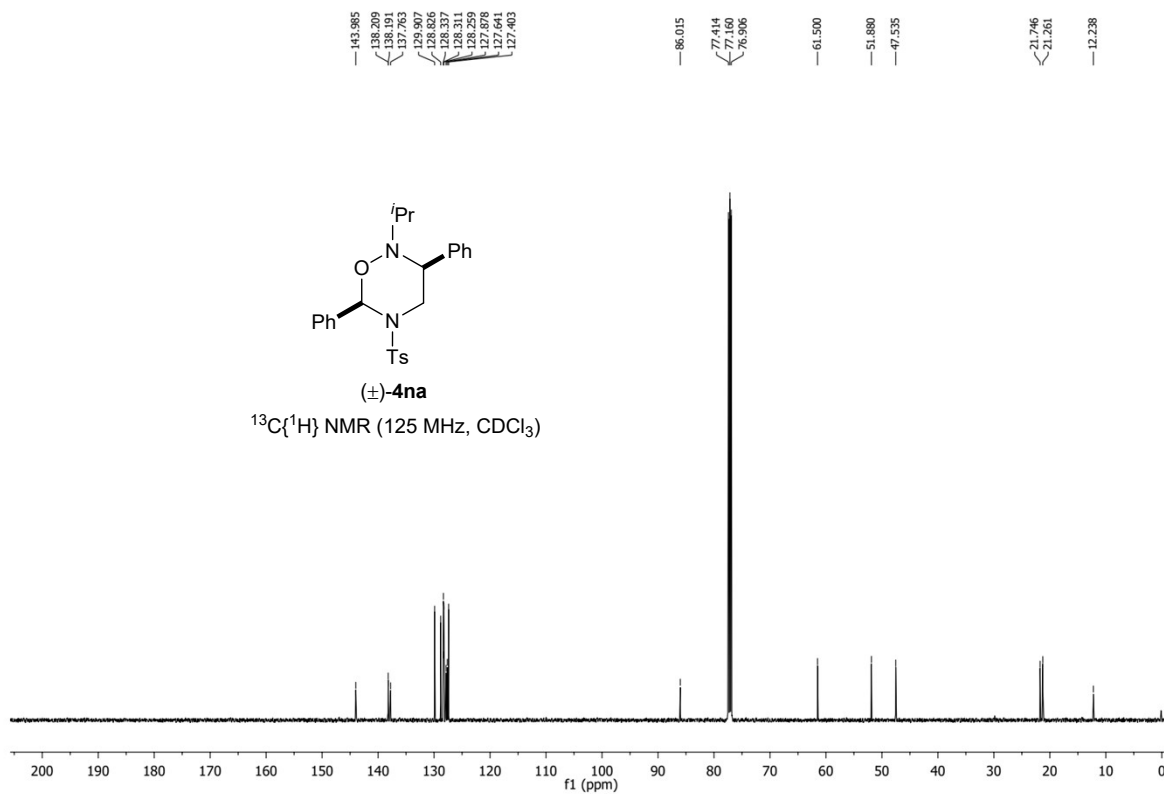

PKM-N-BN-OA-AZI-1H

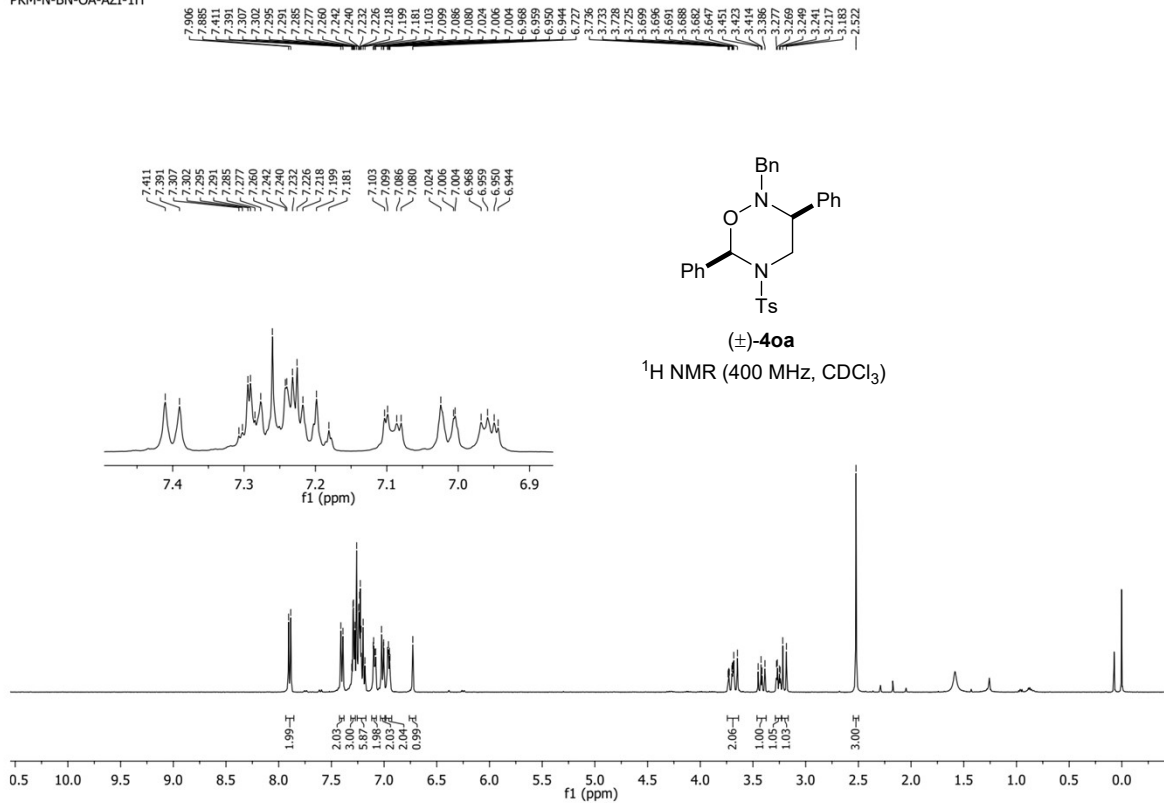

PKM-N-BN-OA-AZI-13C

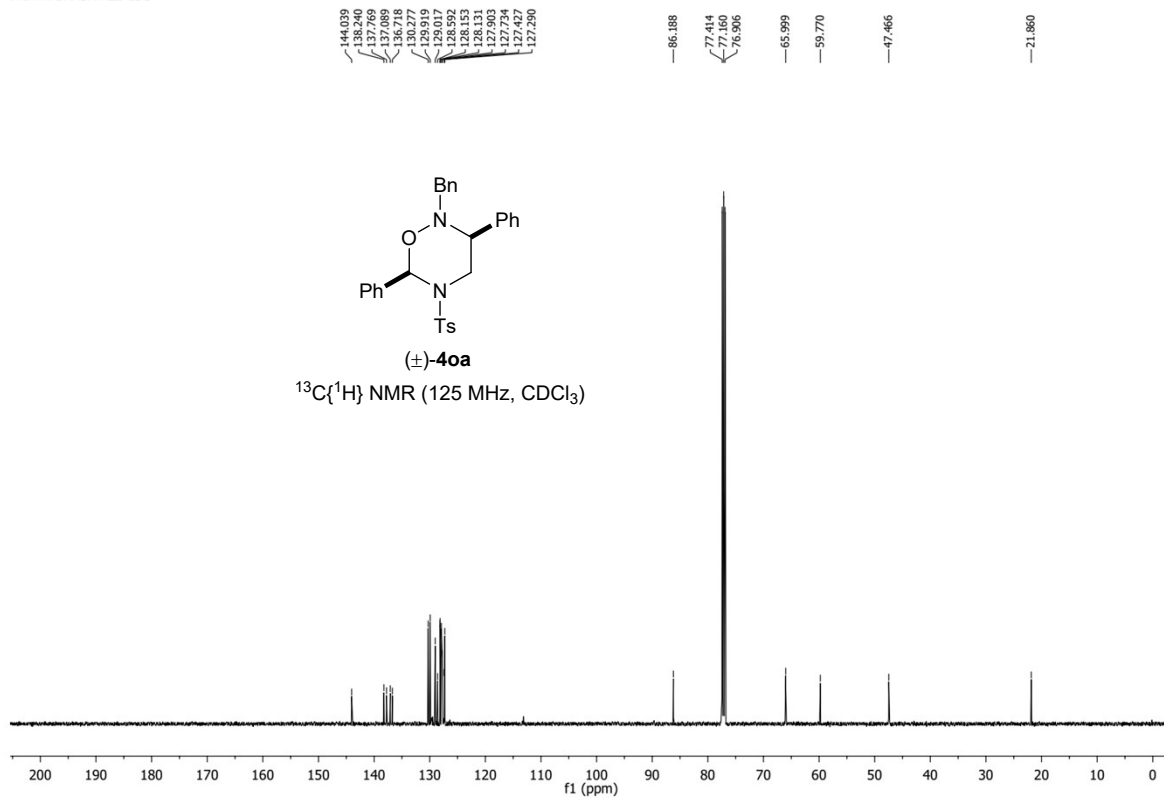

PKM-NBu-OA-AZI-1H

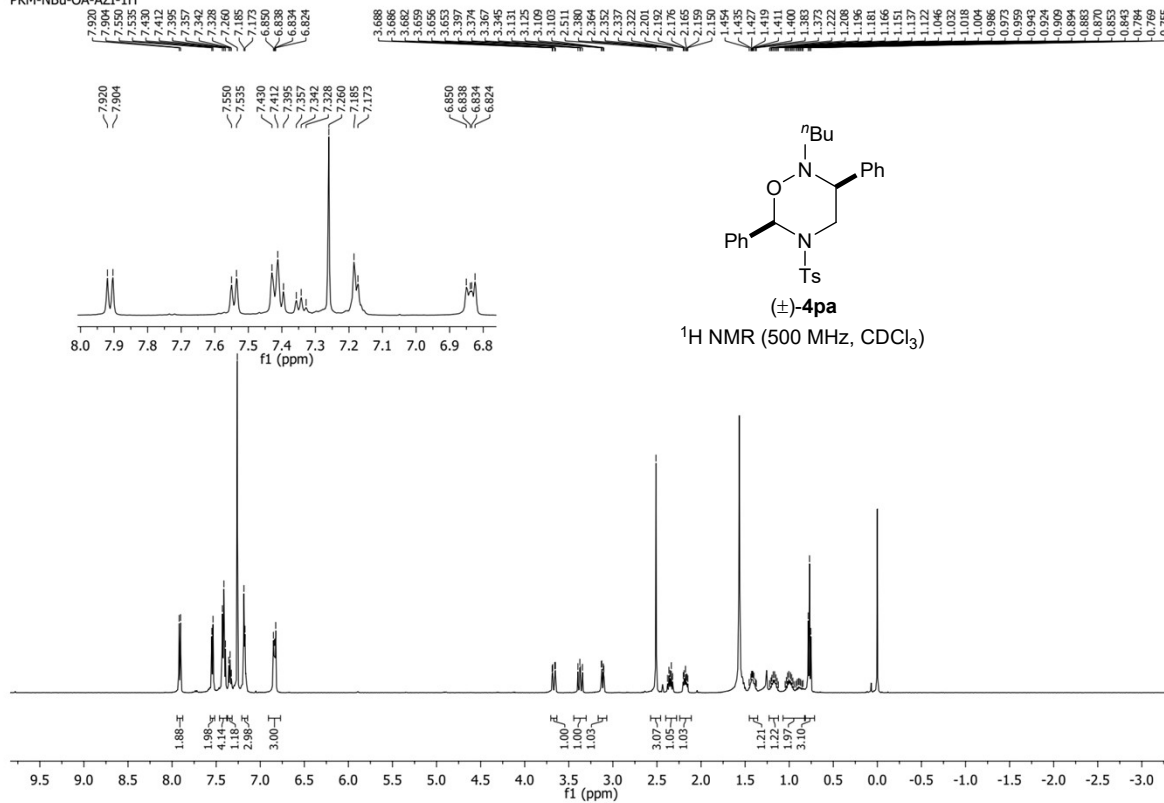

PKM-NBu-OA-AZI-13C

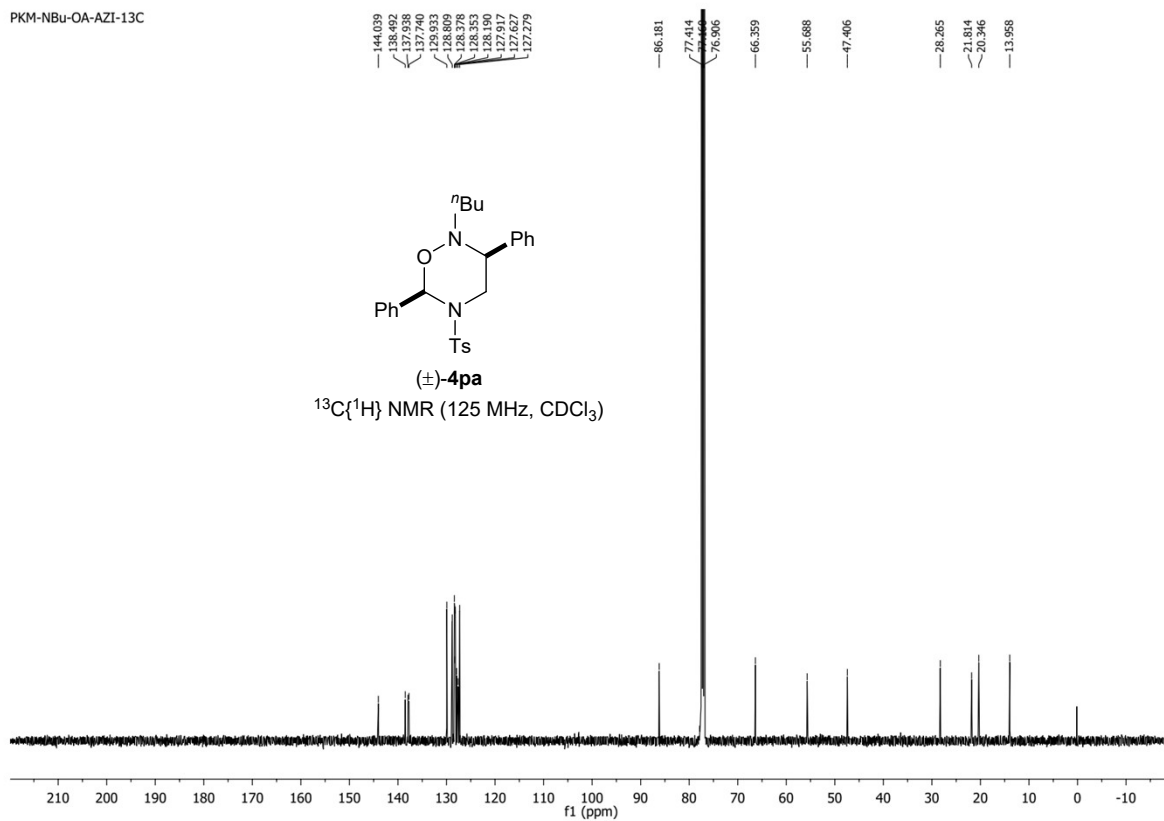

PKM-NMe-OA-AZI-1H

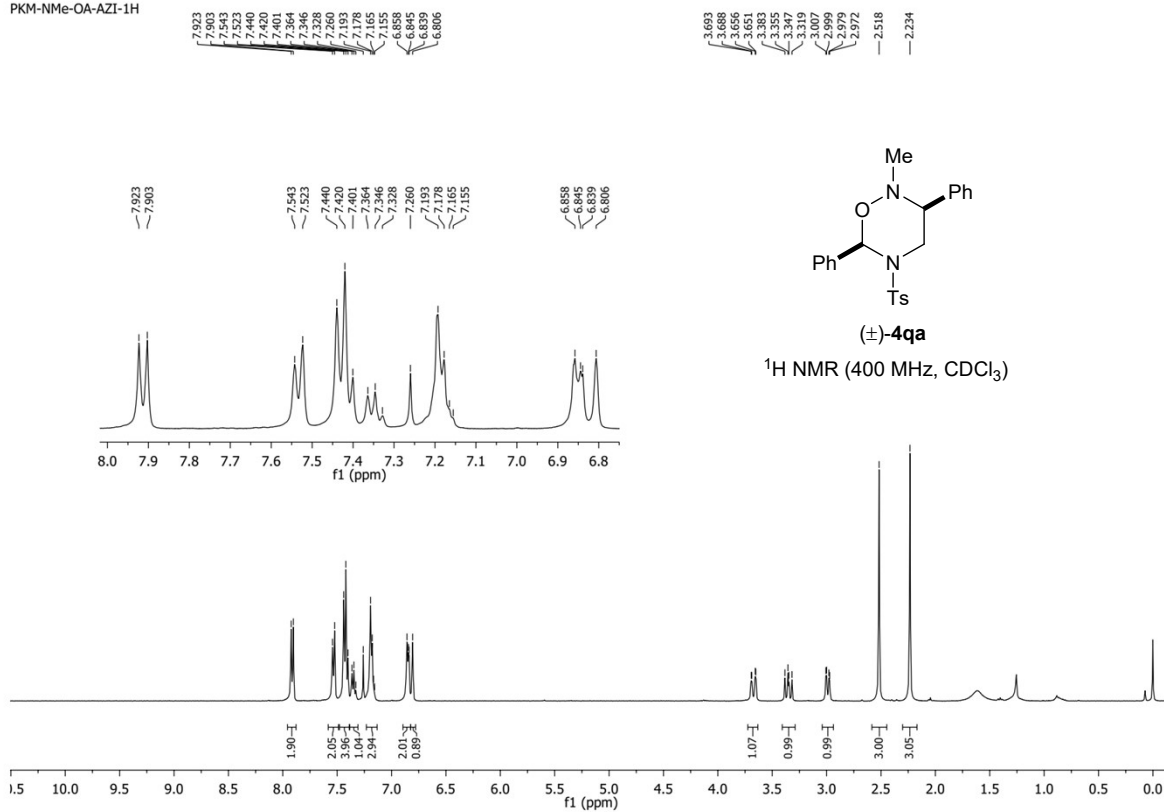

PKM-NMe-OA-AZI-13C

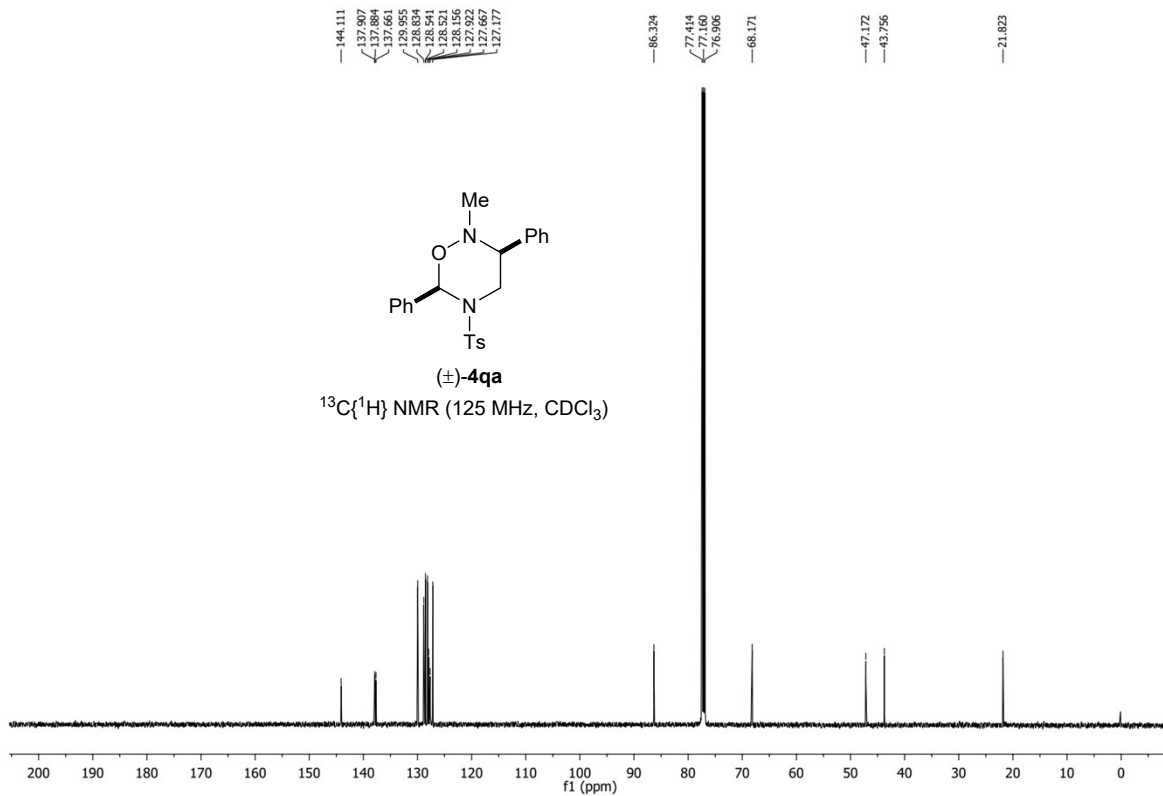

PKM-nPr-OA-AZI-1H

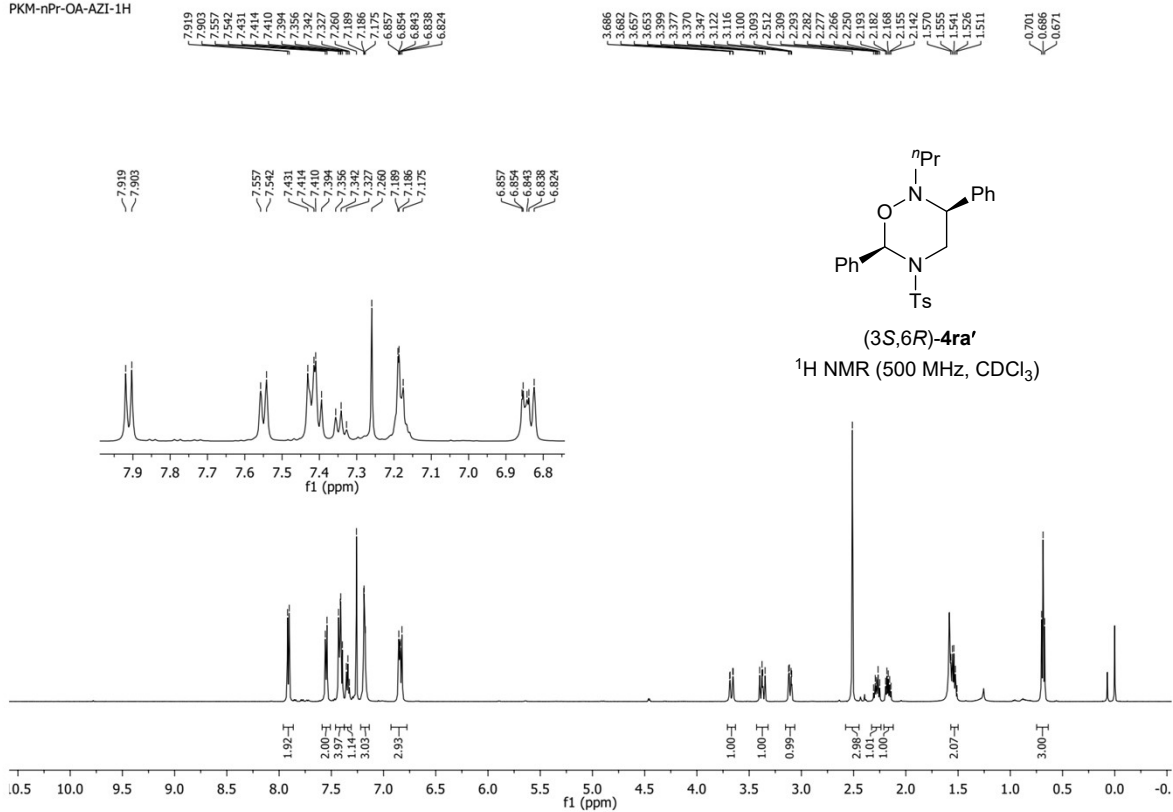

PKM-nPr-OA-AZI-13C

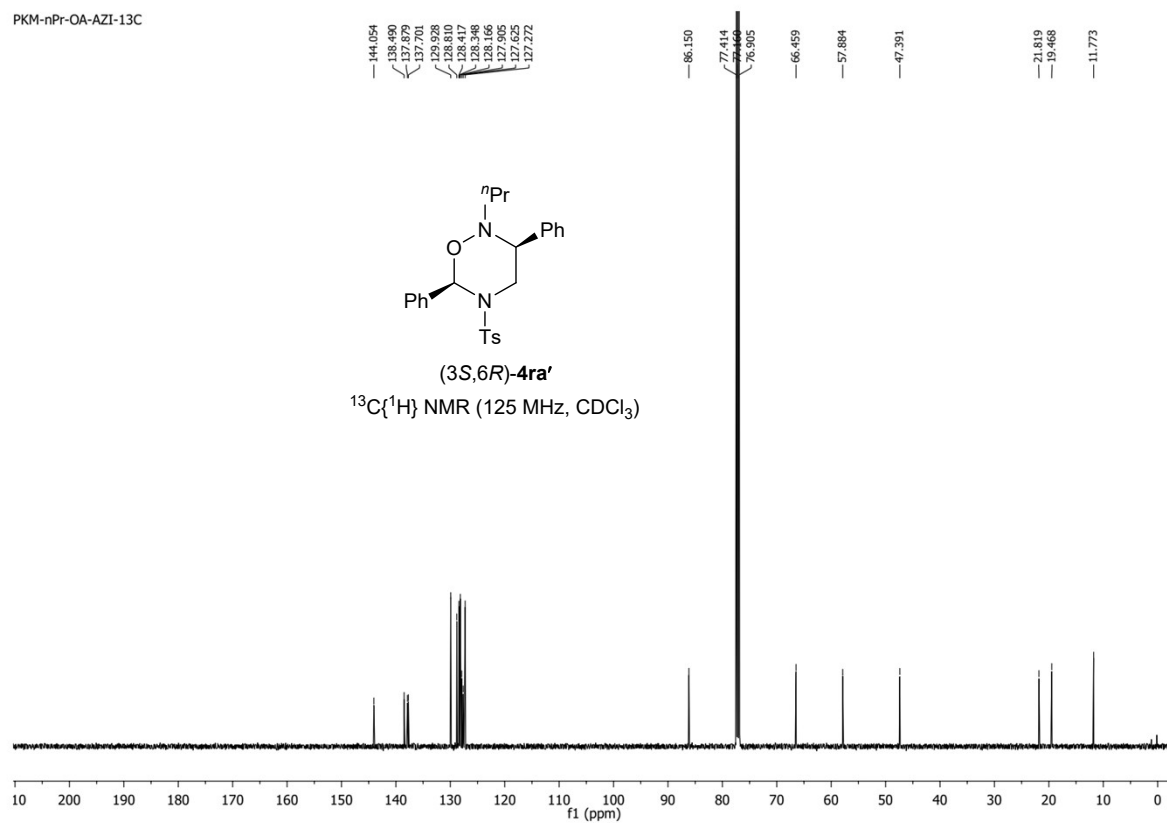

PKM-4Cl-NPr-OA-AZI-1H

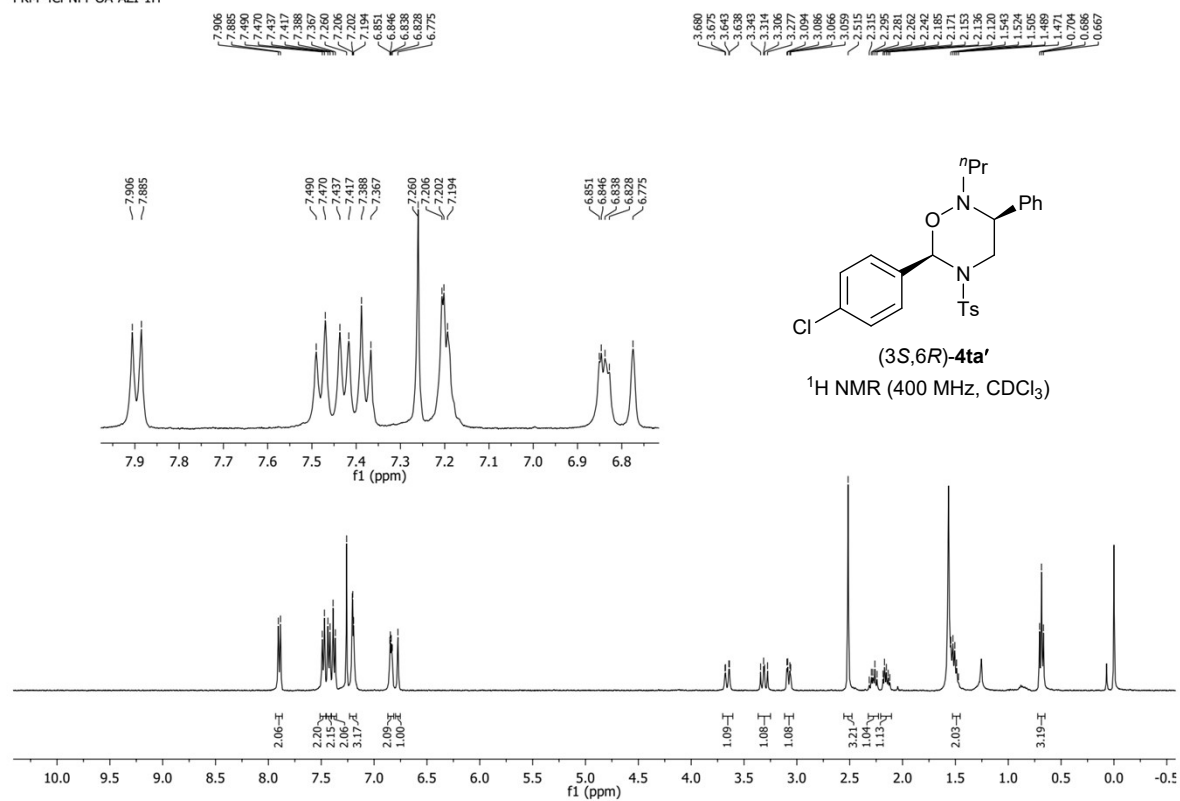

PKM-4Cl-NPr-OA-AZI-13C

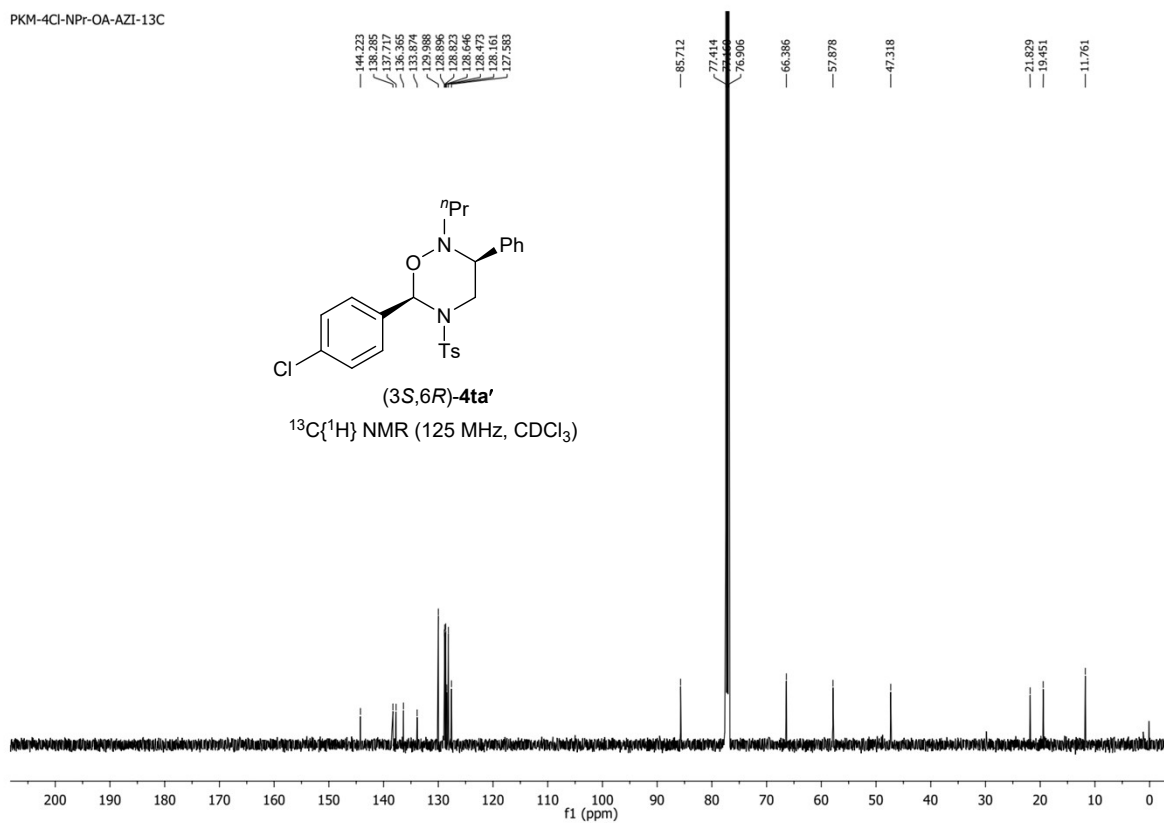

PKM-4Me-NPr-OA-AZI-1H

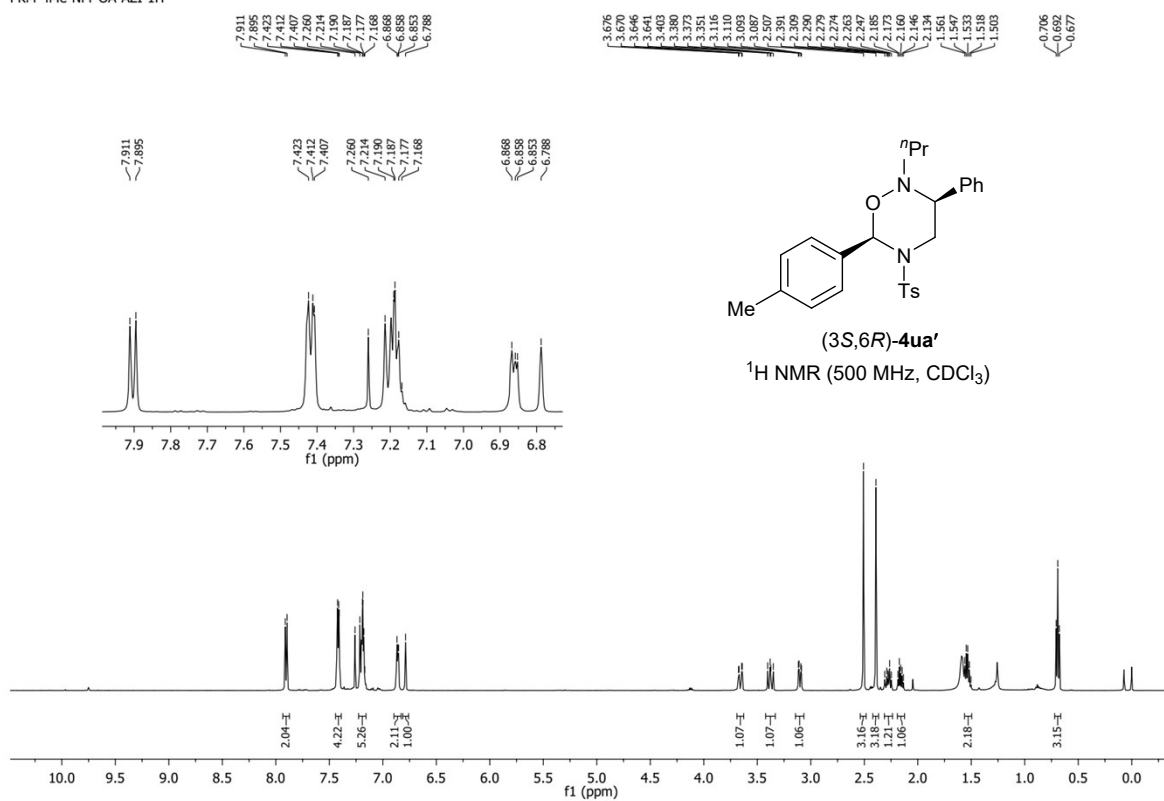

PKM-4Me-NPr-OA-AZI-13C

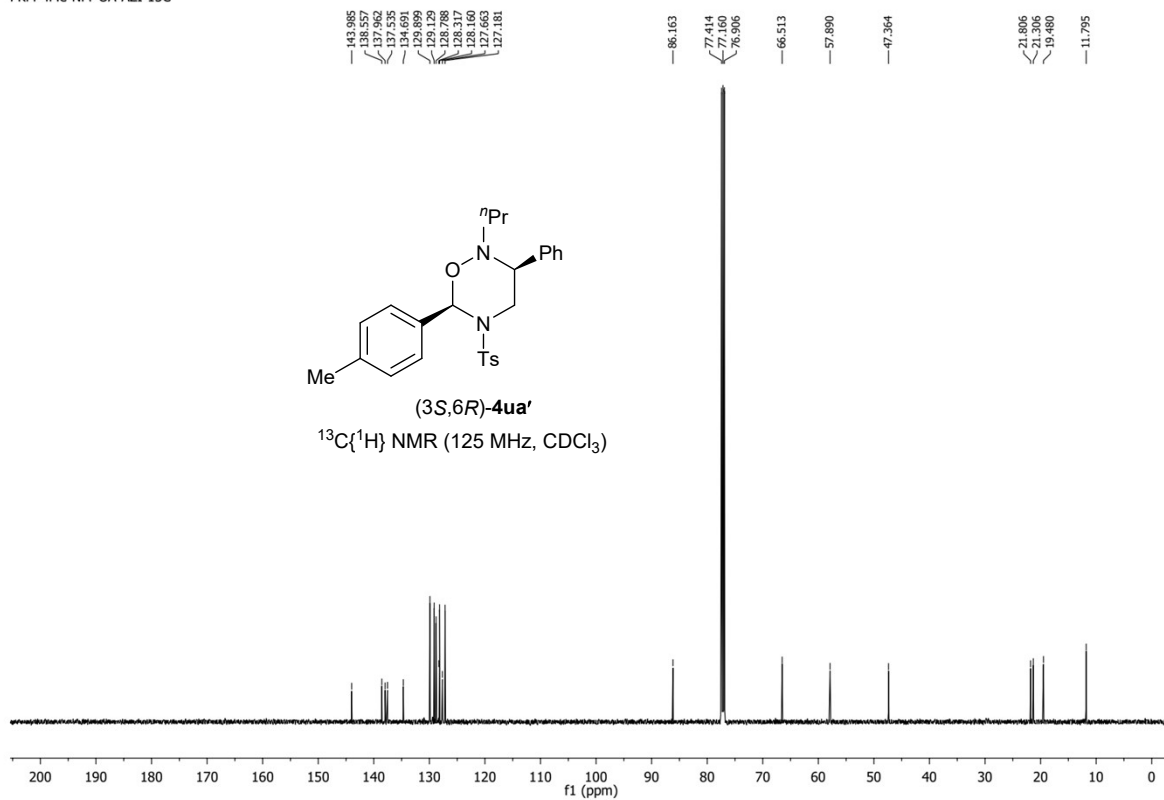

PKM-2-NAPHTHYL-NPr-OA-AZI-1H

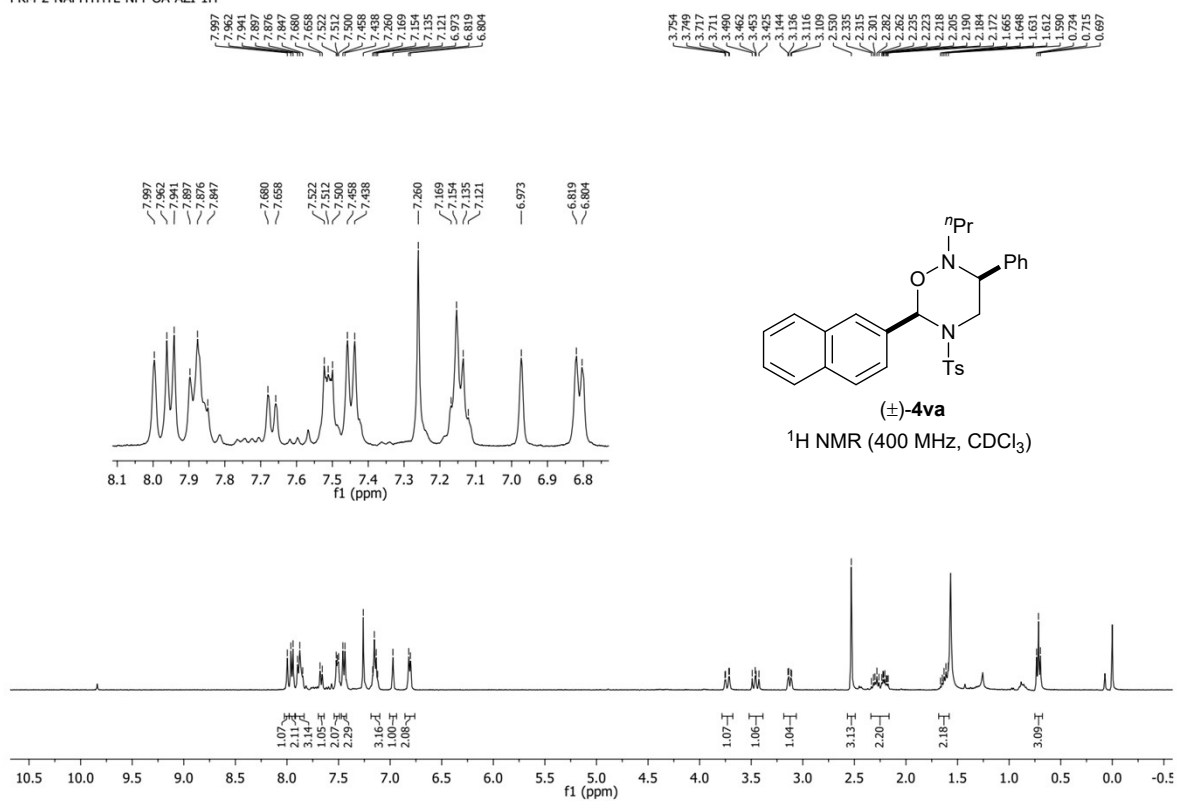

PKM-2-NAPHTHYL-NPr-OA-AZI-13C

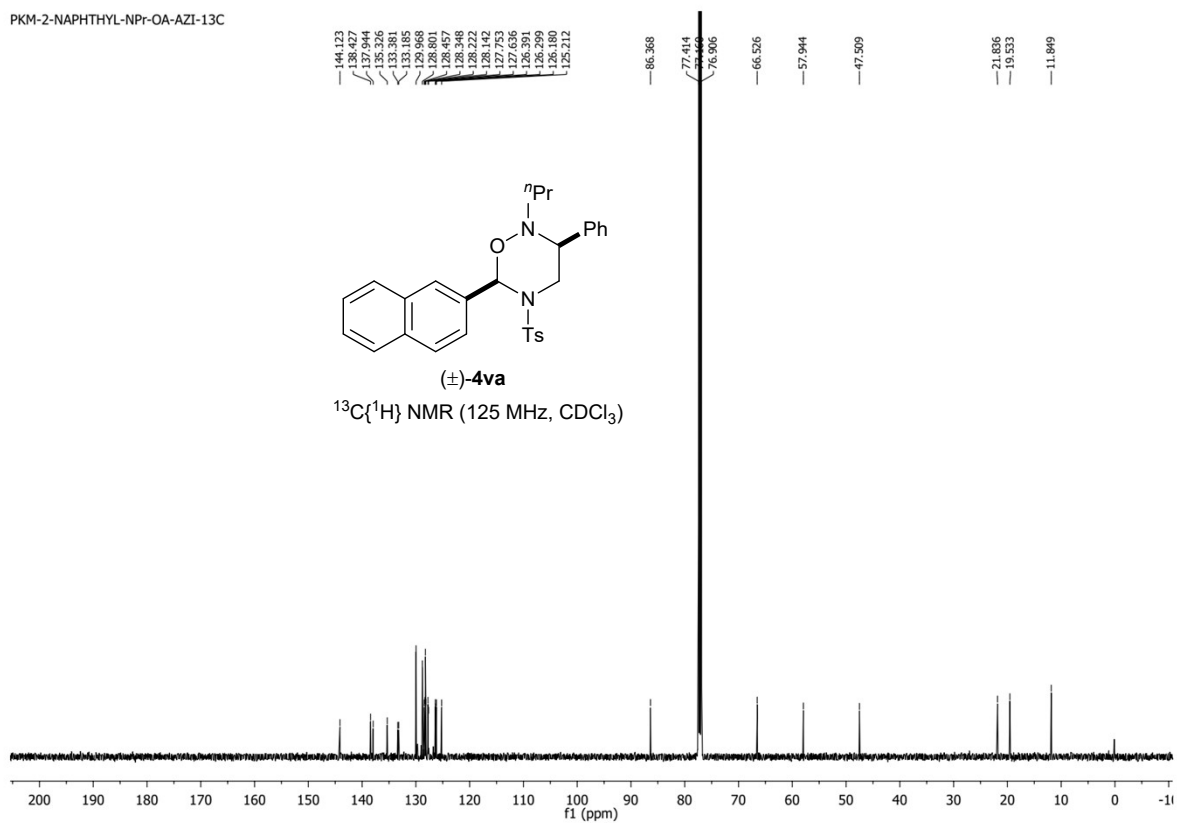

PKM-NPR-OA-4BR-AZI-1H

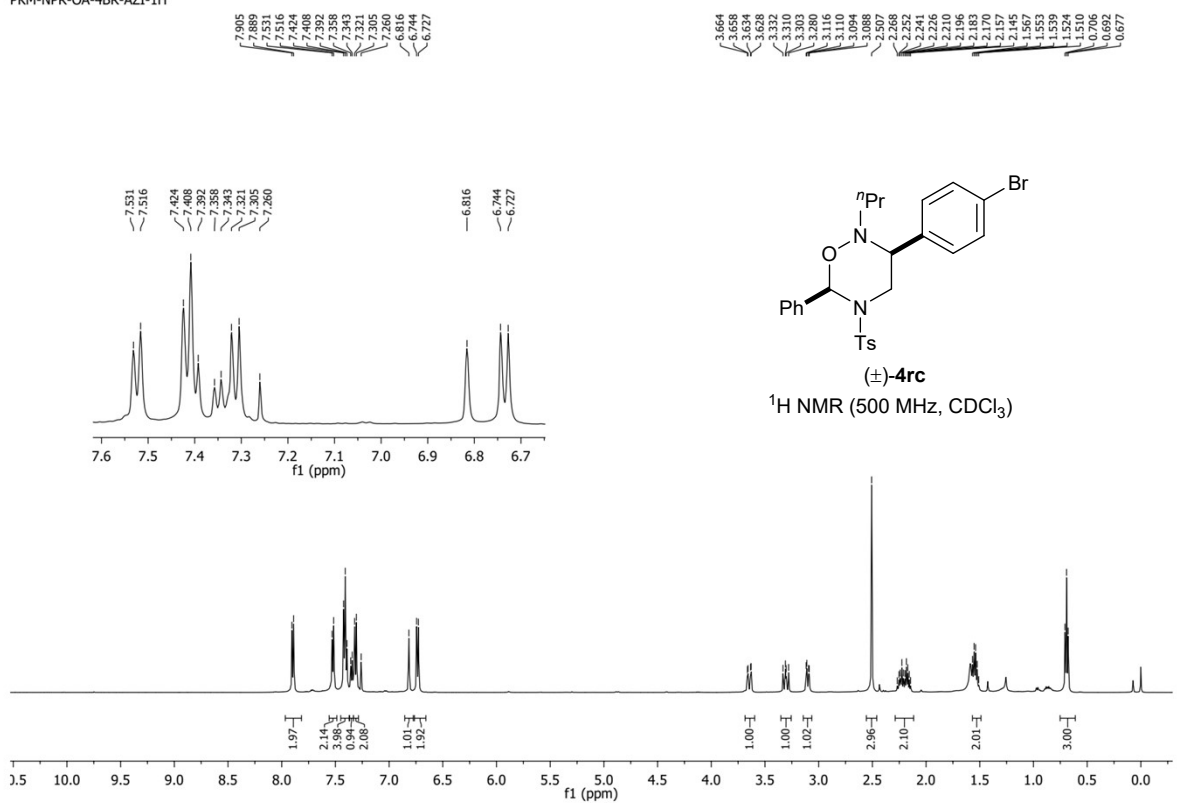

PKM-NPR-OA-4BR-AZI-13C

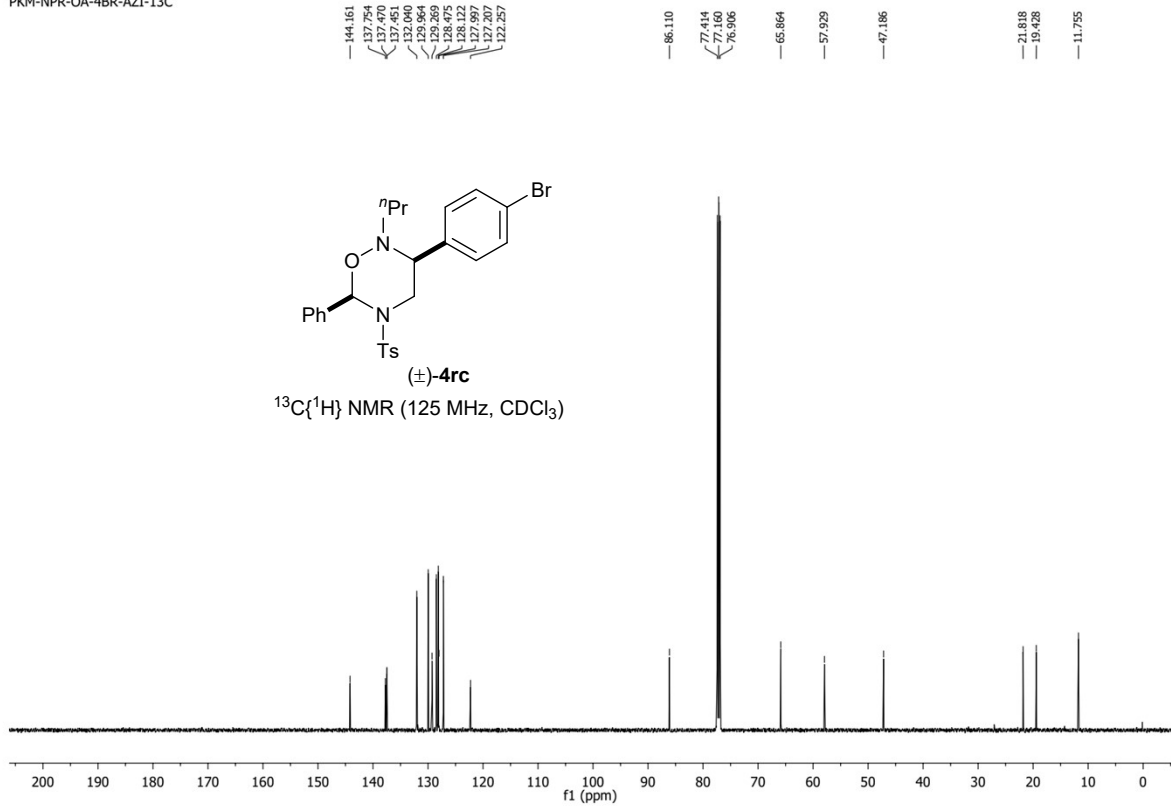

PKM-nPr-OA-4CL-AZI-1H

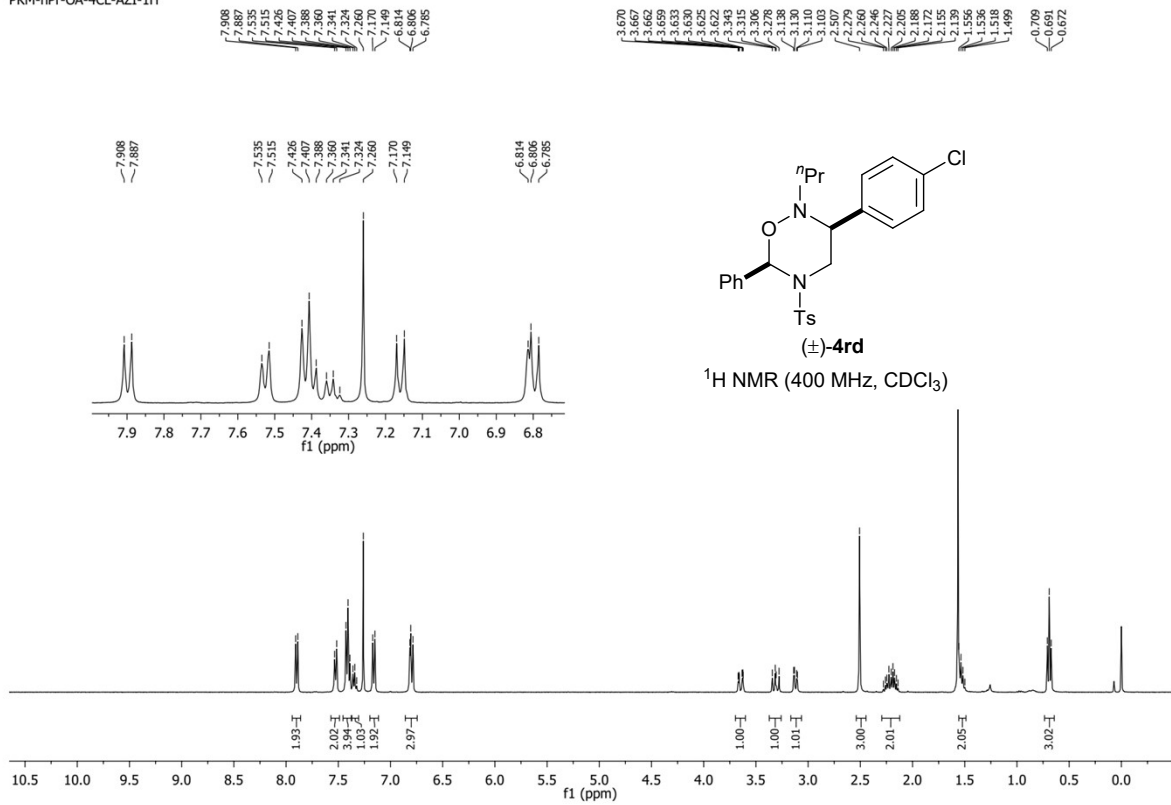

PKM-nPr-OA-4CL-AZI-13C

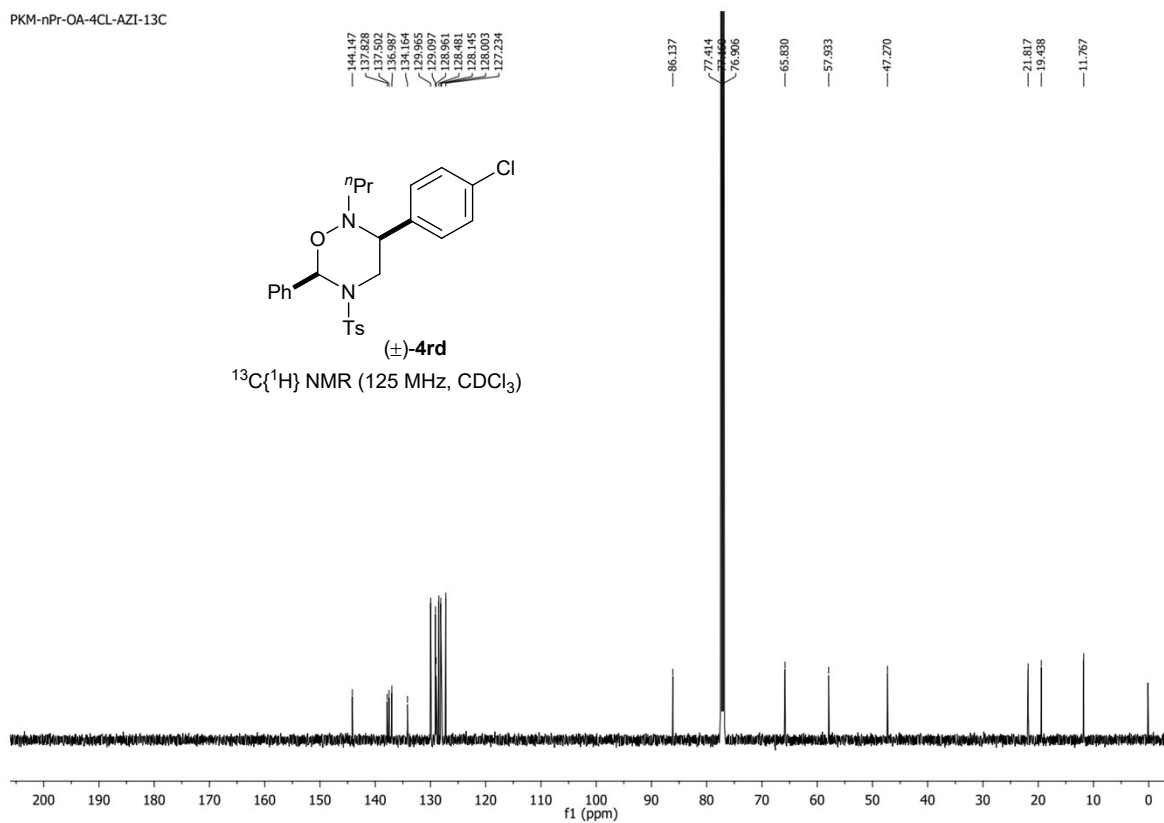

PKM-nPr-OA-4Me-AZI-1H

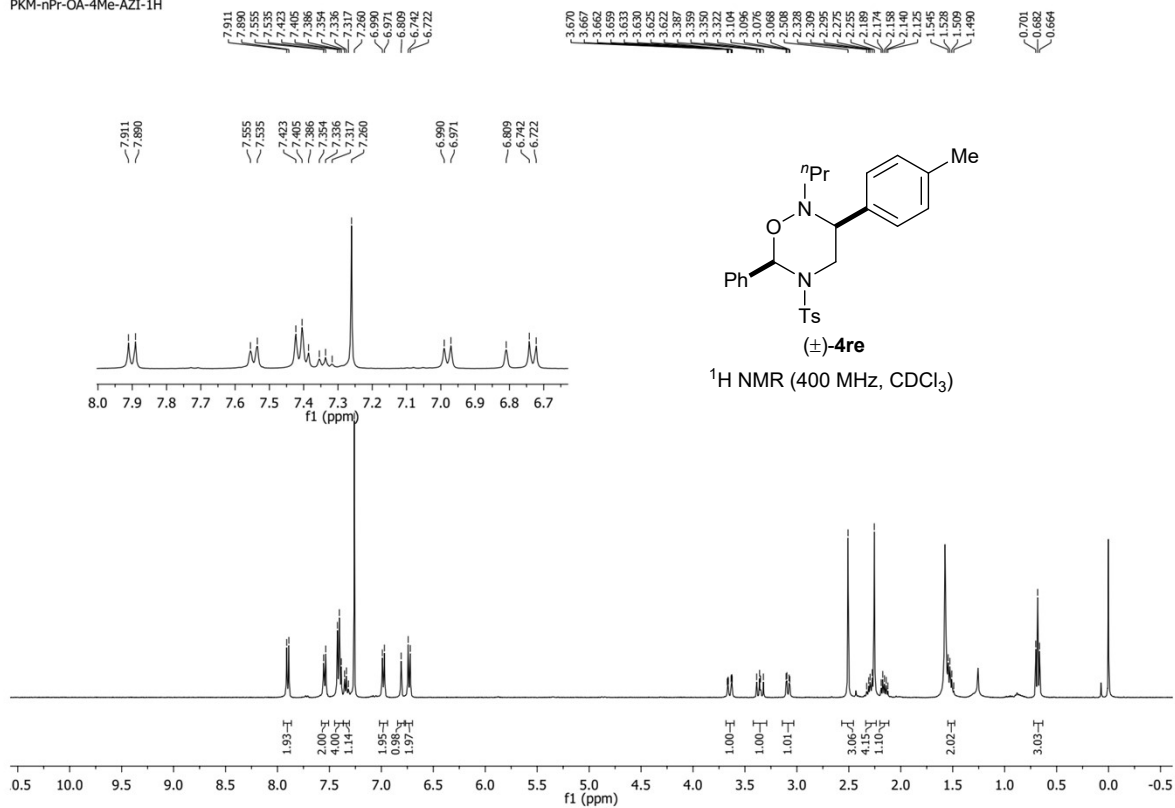

PKM-nPr-OA-4Me-AZI-13C

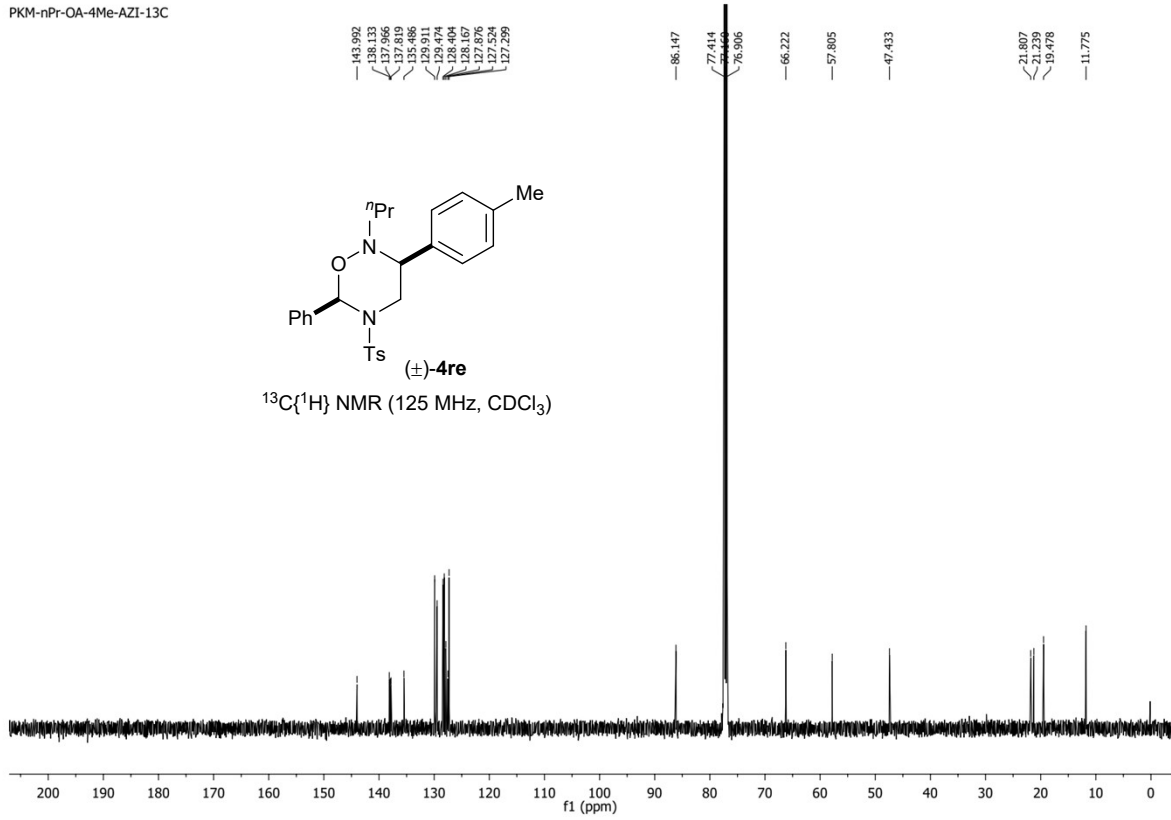

PKM-nPr-OA-4Ph-AZI-1H

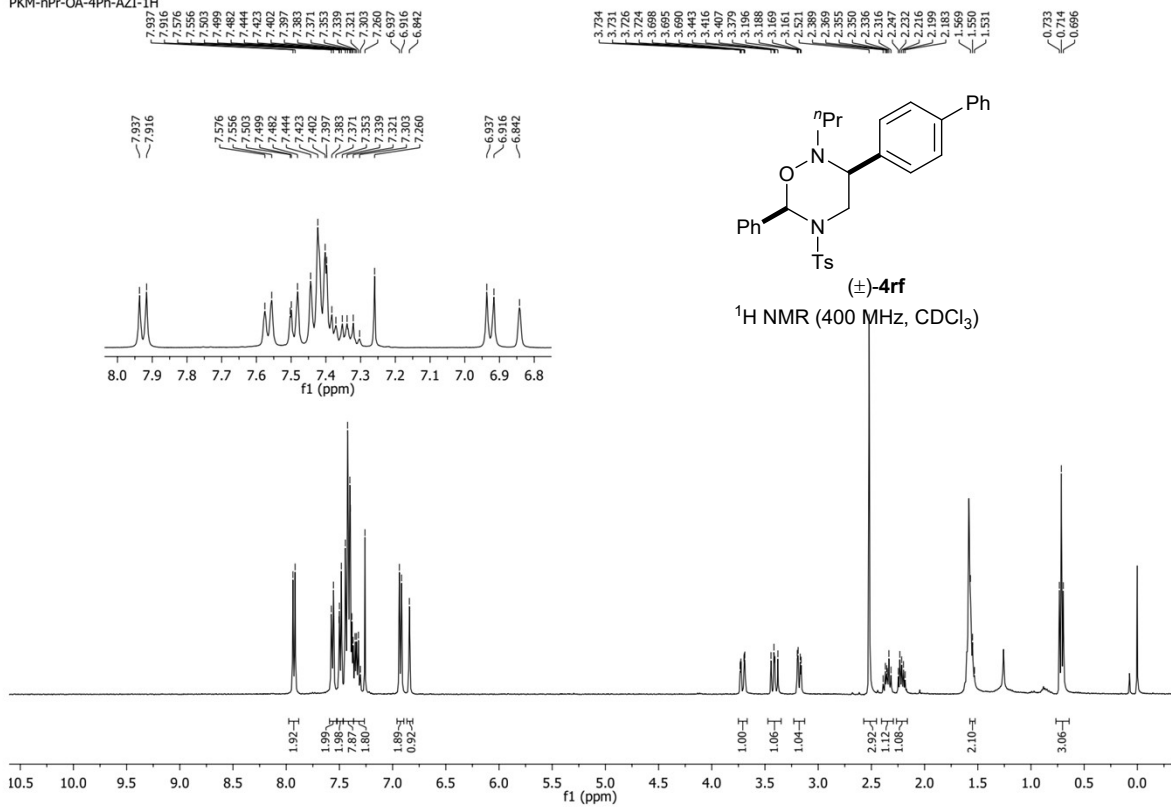

PKM-nPr-OA-4Ph-AZI-13C

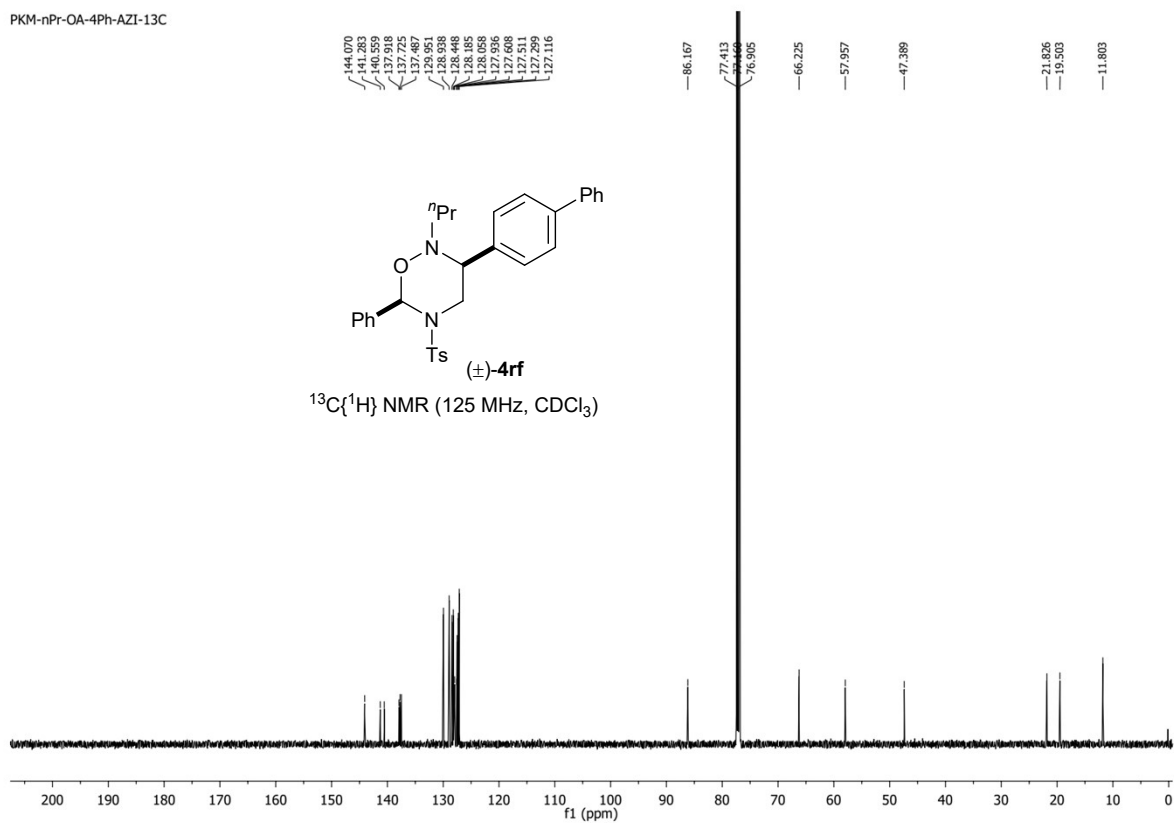

PKM-nPr-OA-SO2Ph-AZI-1H

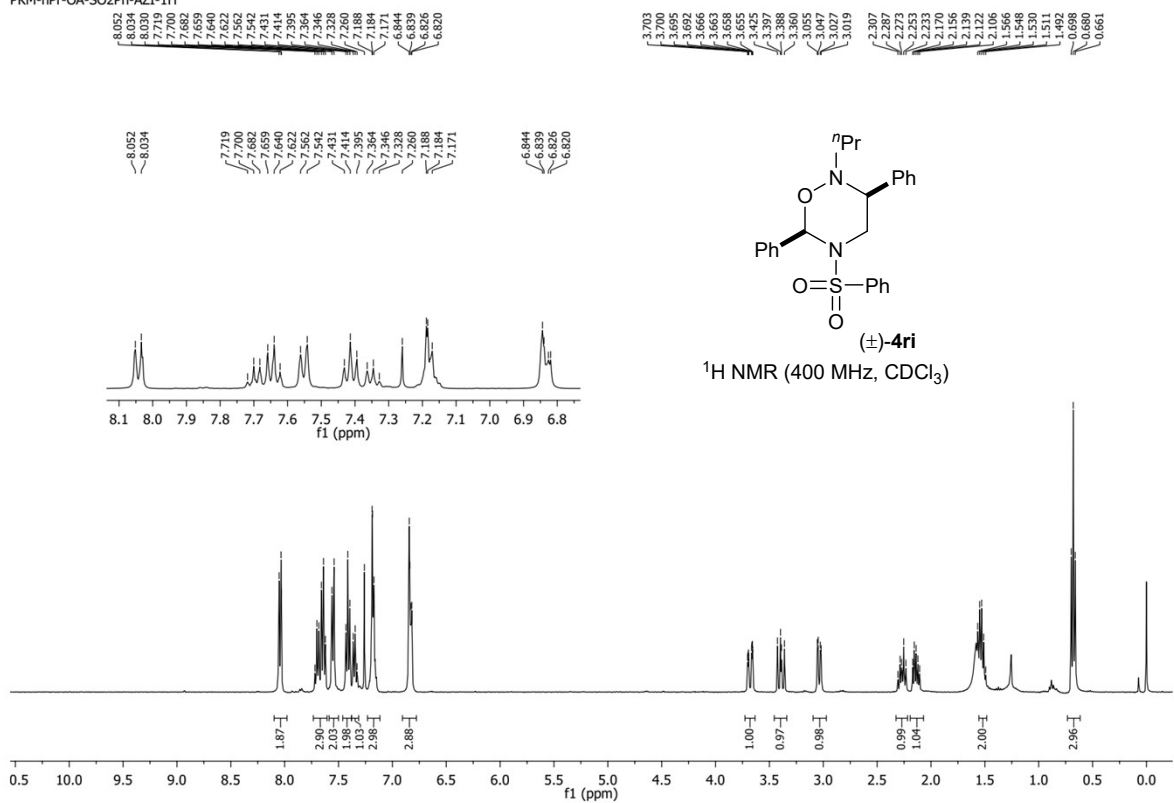

PKM-nPr-OA-SO2Ph-AZI-13C

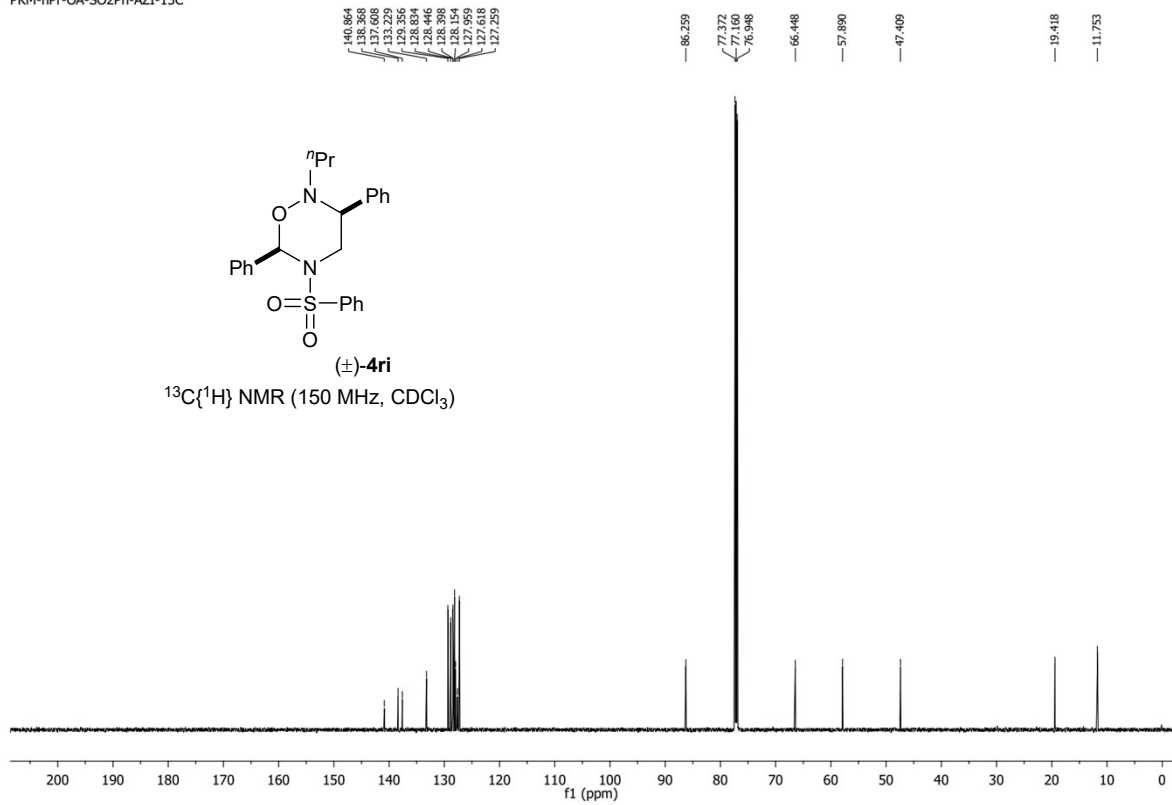

PKM-NPR-OA-2-NAPH-SUL-AZI-1H

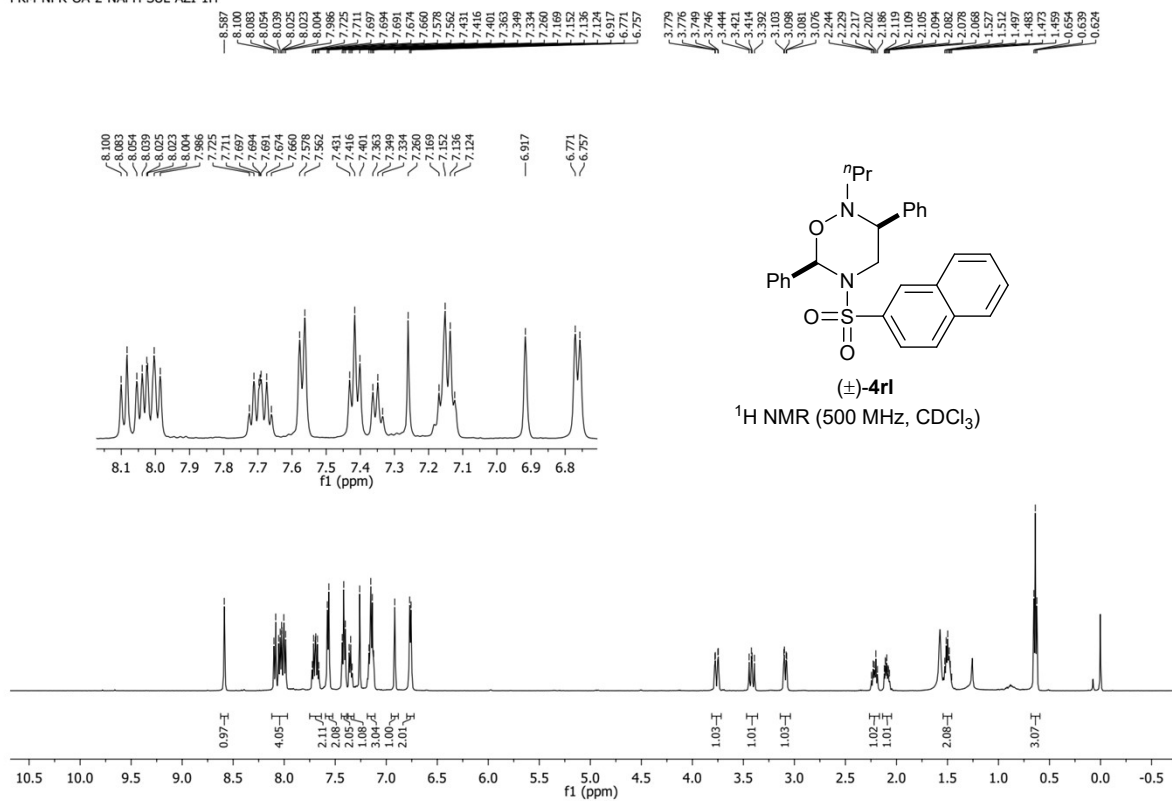

PKM-NPR-OA-2-NAPH-SUL-AZI-13C

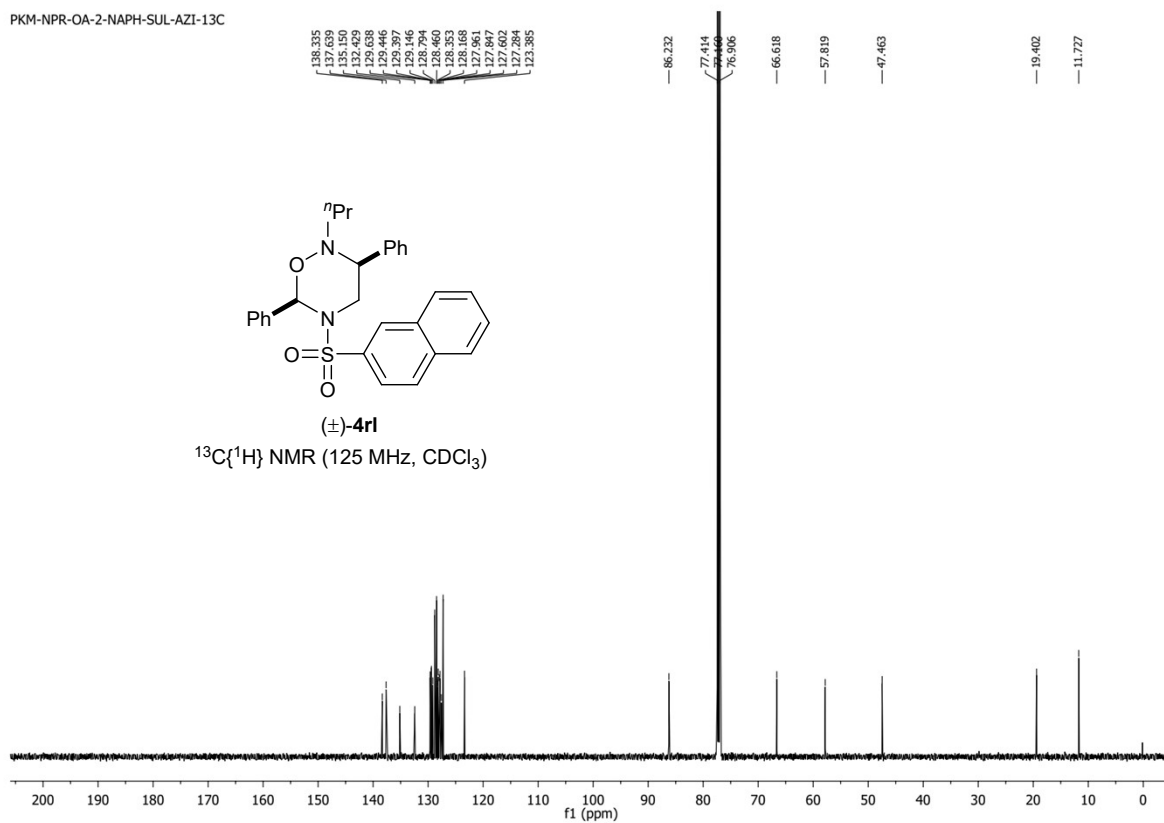

PKM-NPR-OA-THIO-AZI-1H

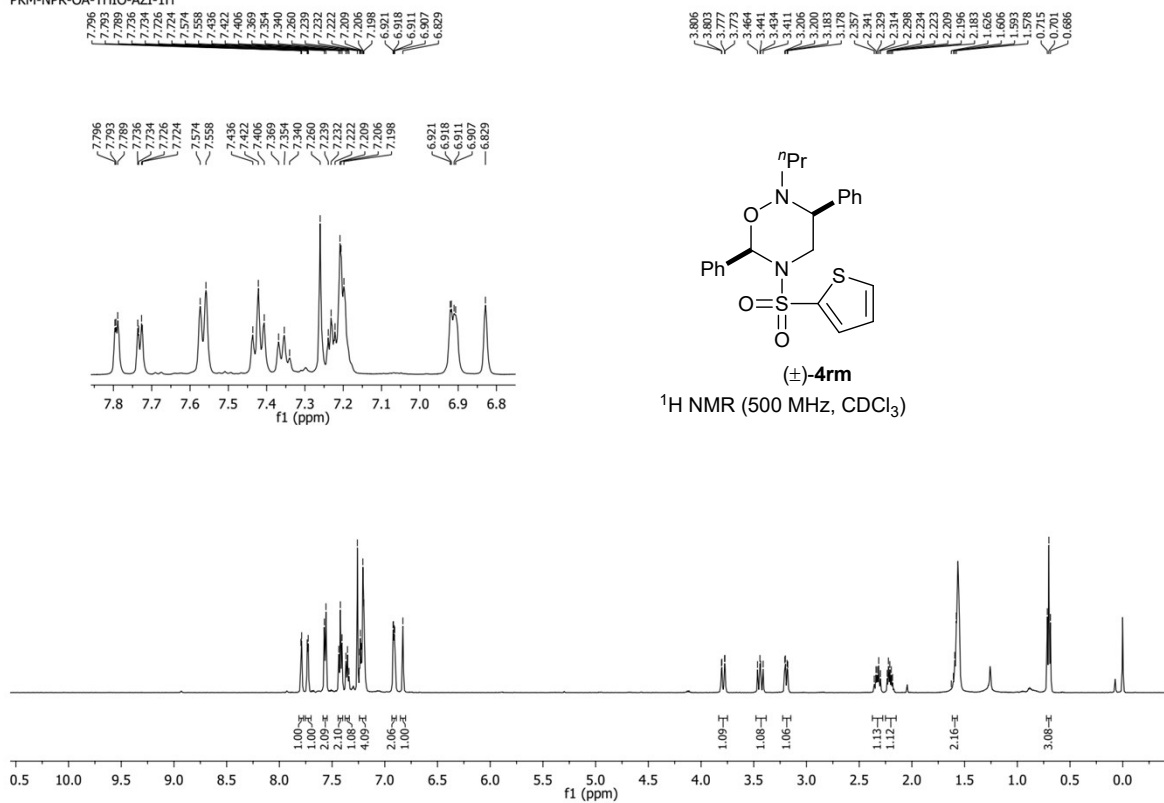

PKM-NPR-OA-THIO-AZI-13C

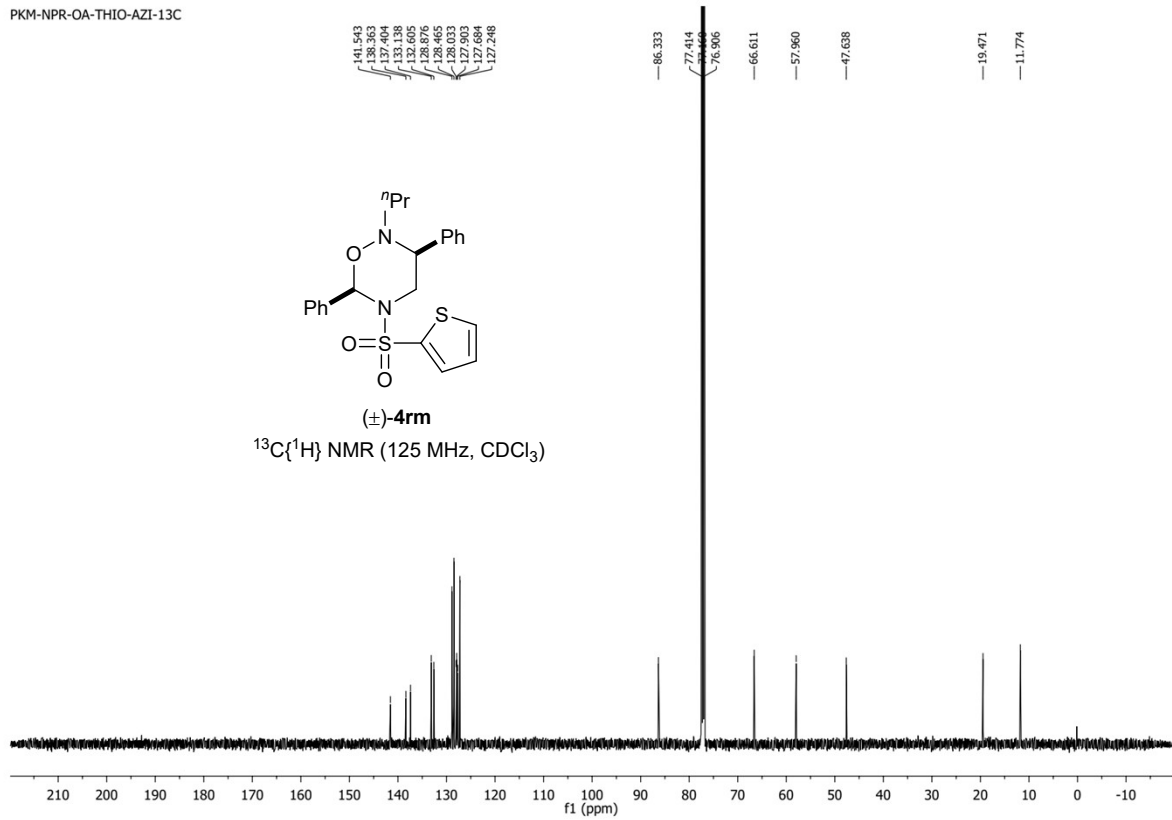

PKM-NPR-OA-CARV-AZI-1H

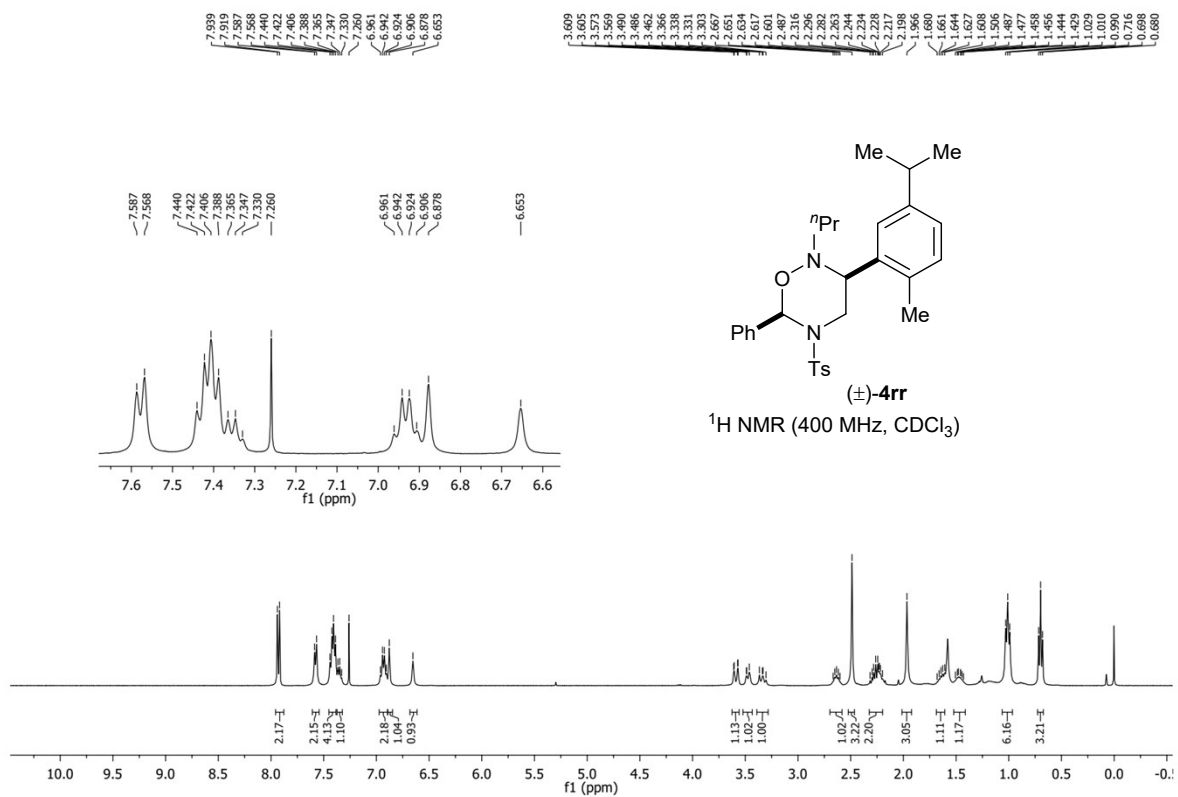

PKM-NPR-OA-CARV-AZI-13C

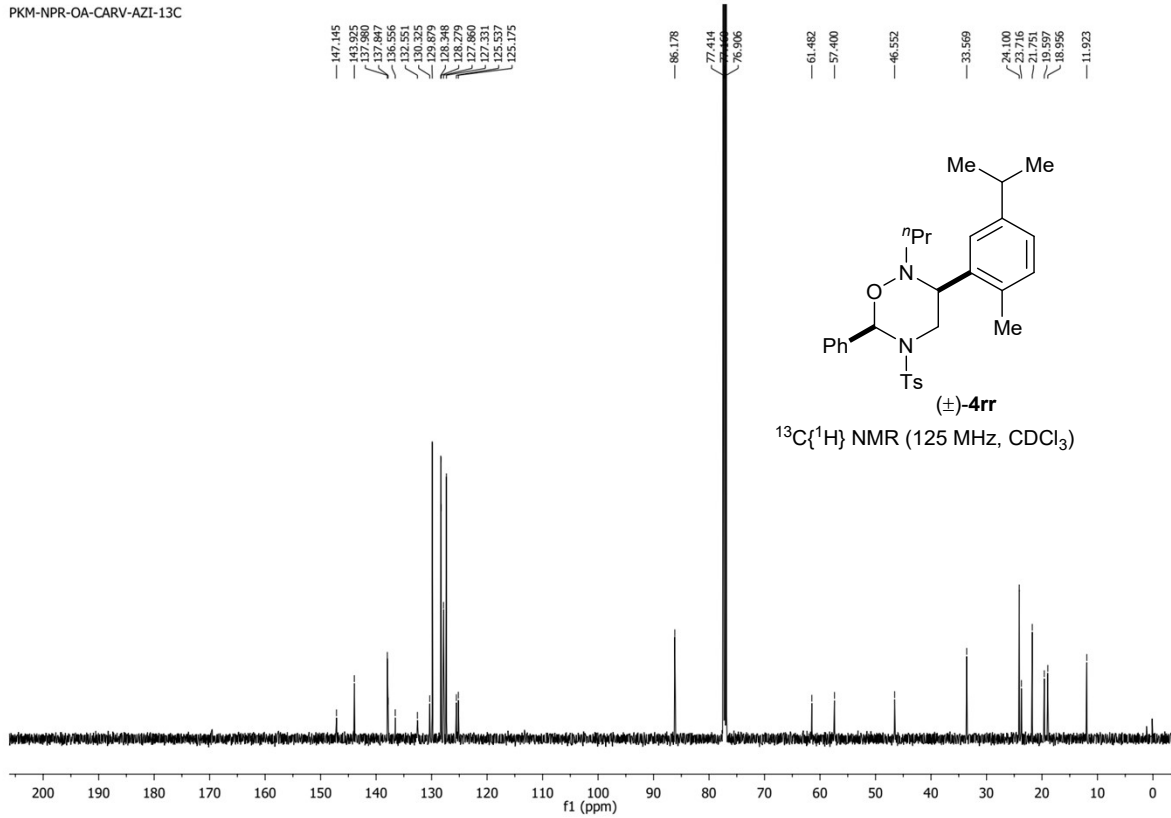

PKM-NPR-CELE-AZI-1H

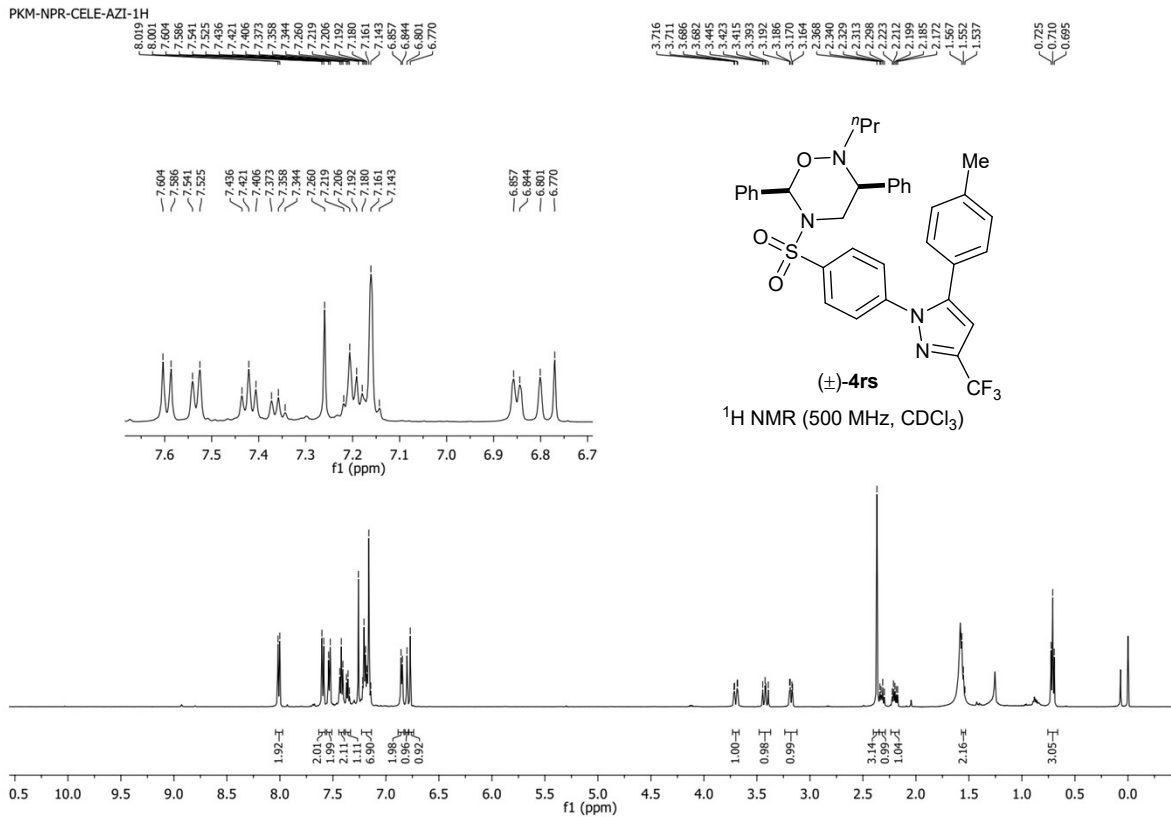

PKM-NPR-CELE-AZI-13C

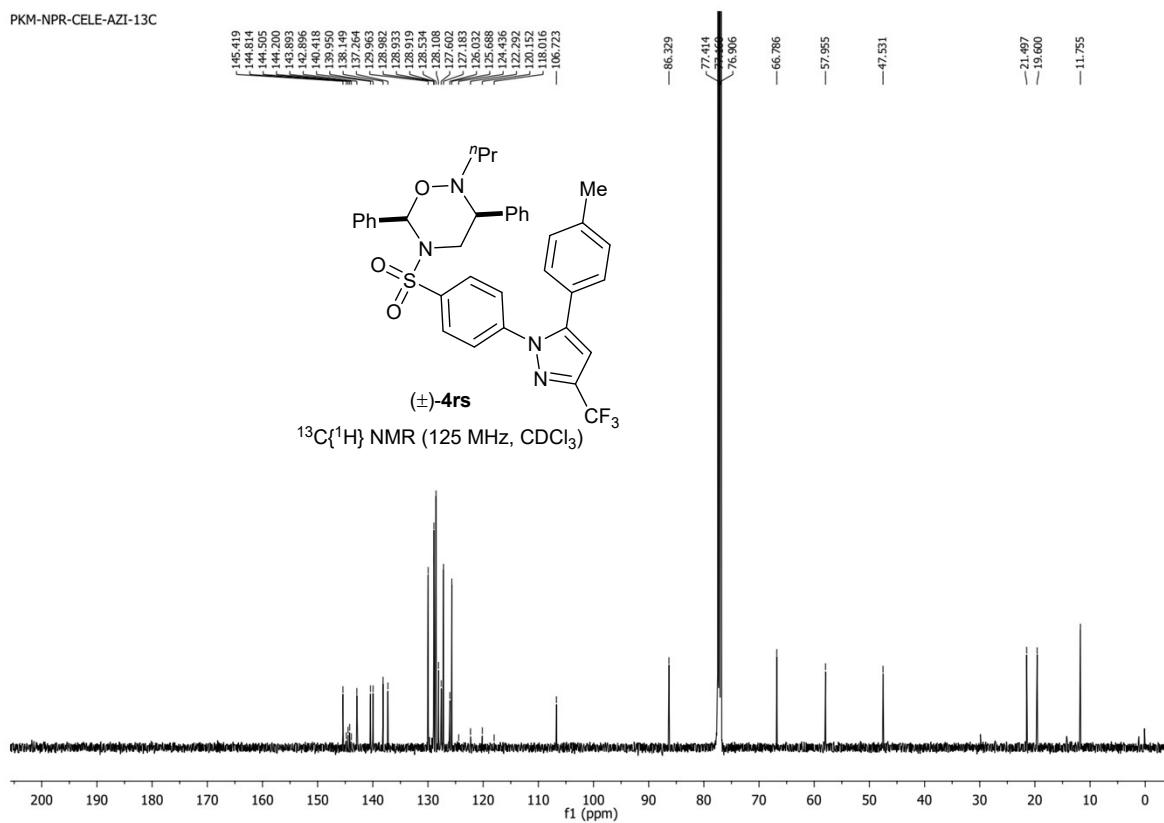

PKM-NPR-CELE-AZI-19F

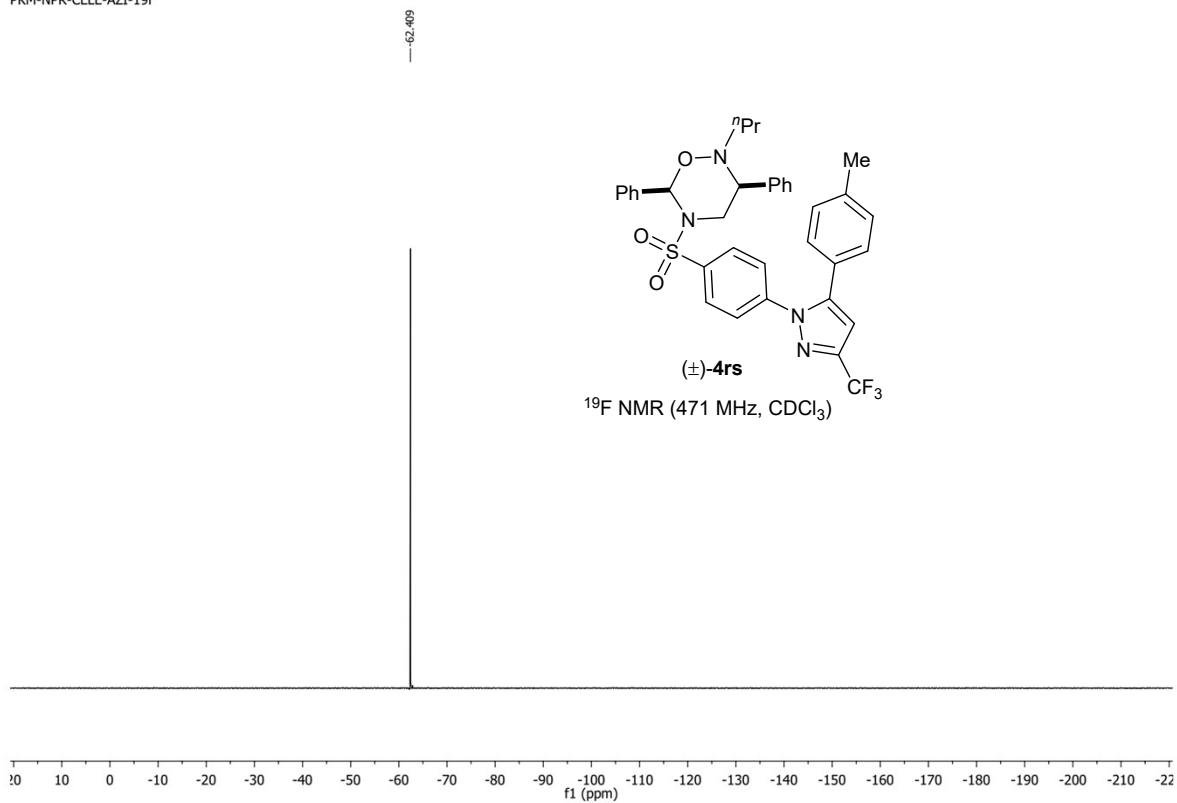

PKM-4-PYRENE-OA-AZI-1H

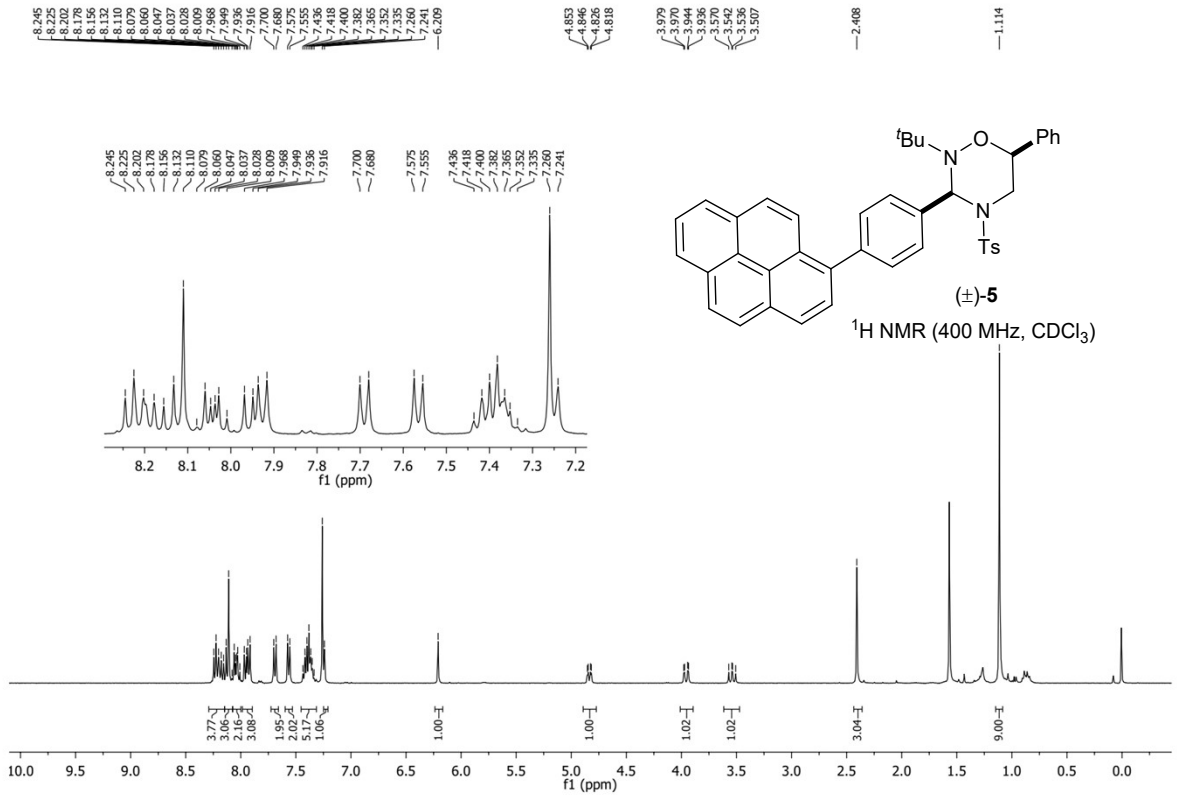

PKM-4-PYRENE-OA-AZI-13C

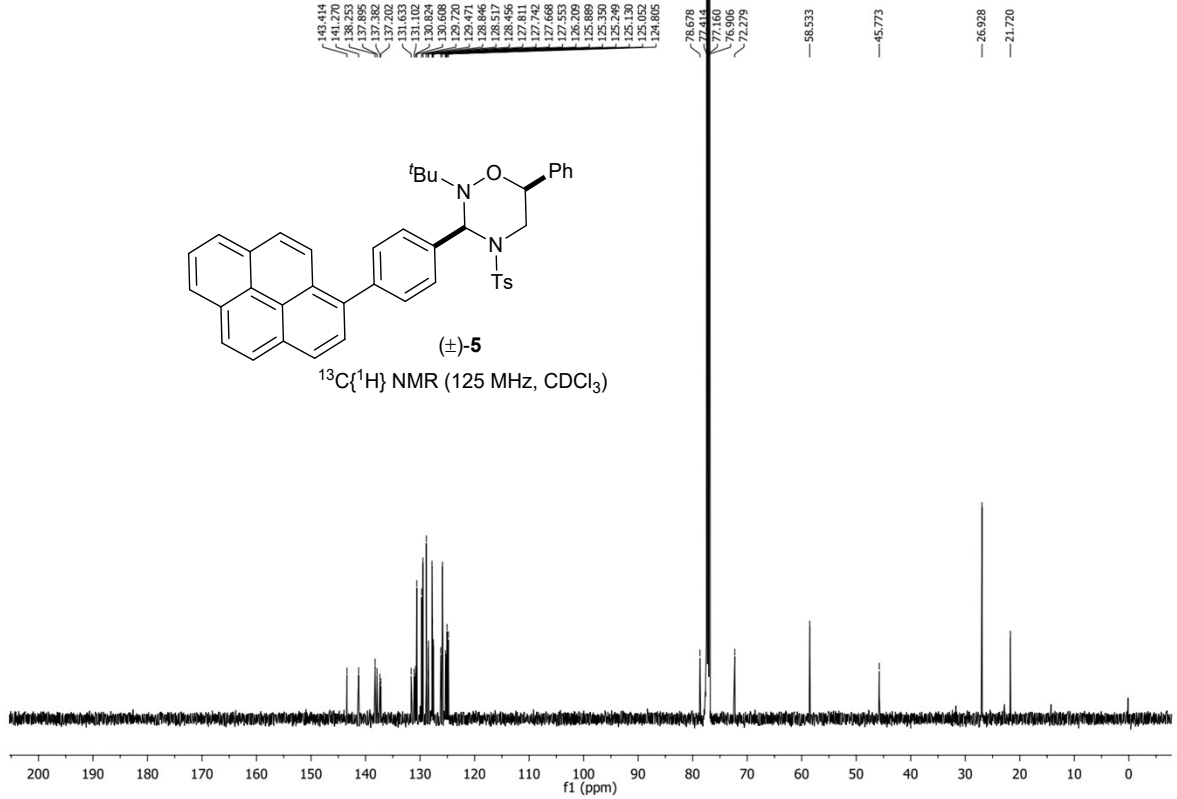

PKM-626-SONO-1H

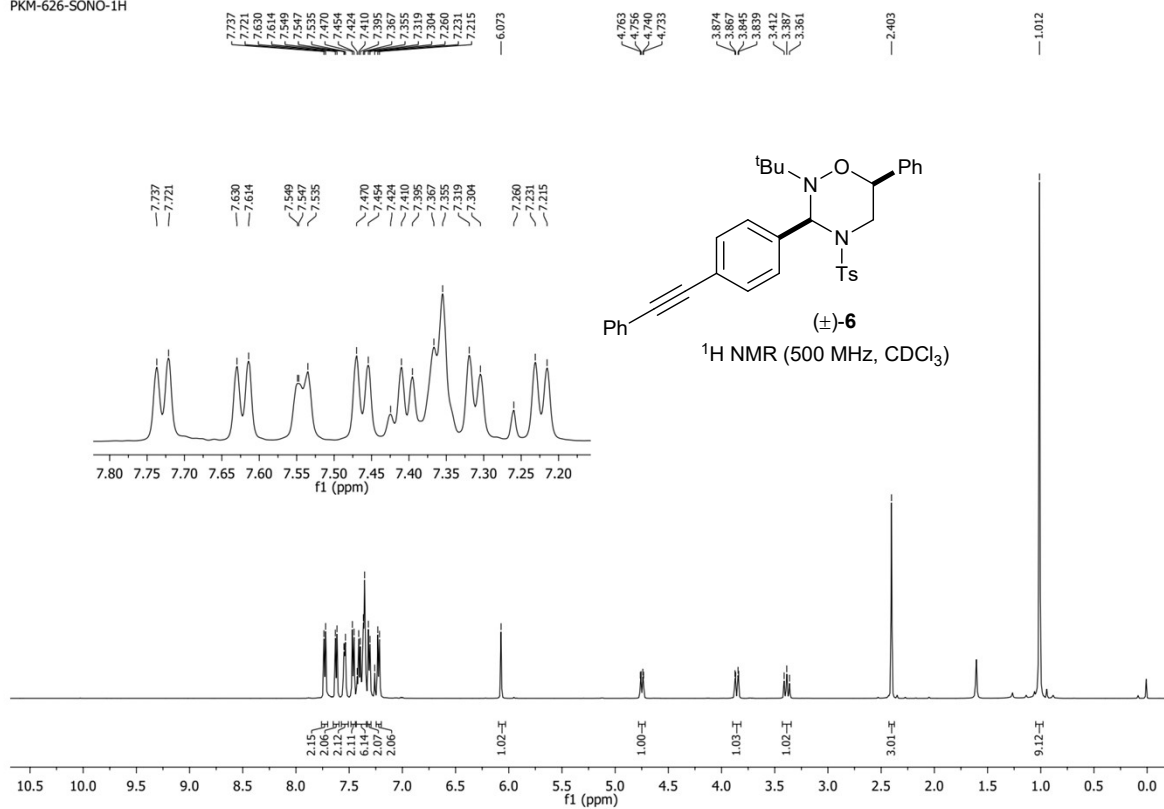

PKM-626-SONO-13C

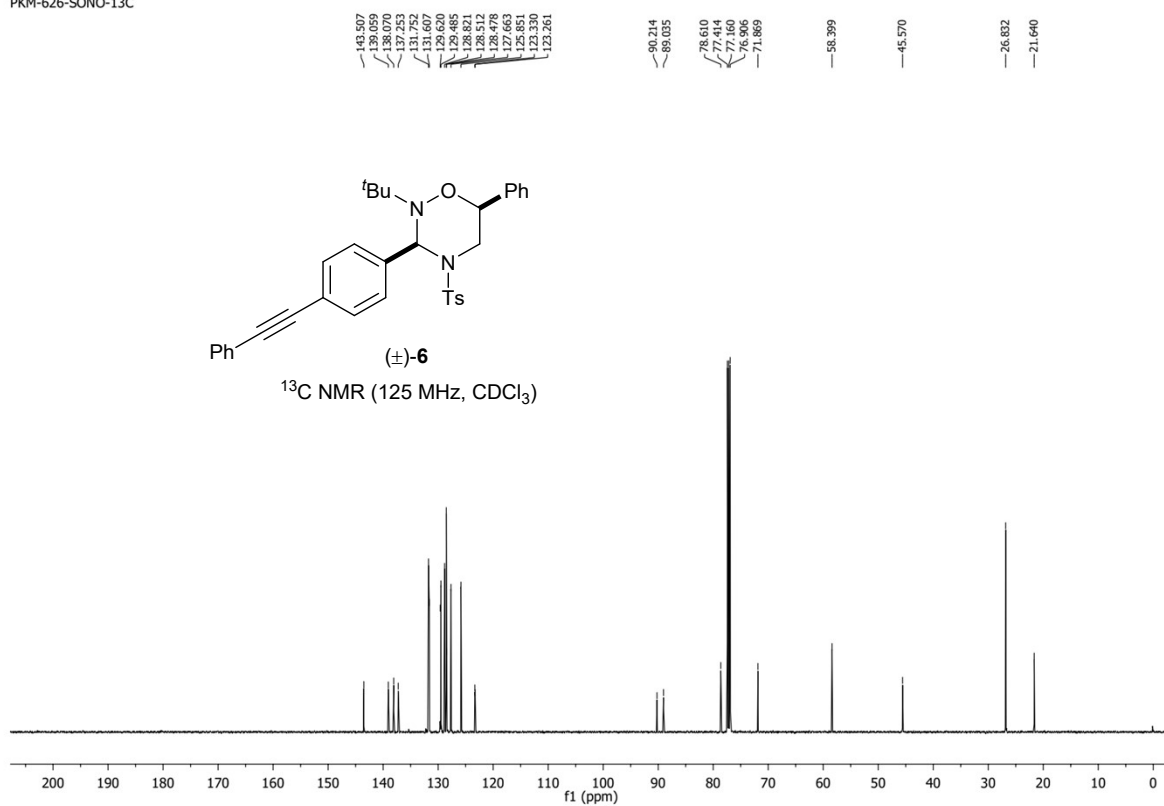

PKM-630-BPIN-1H

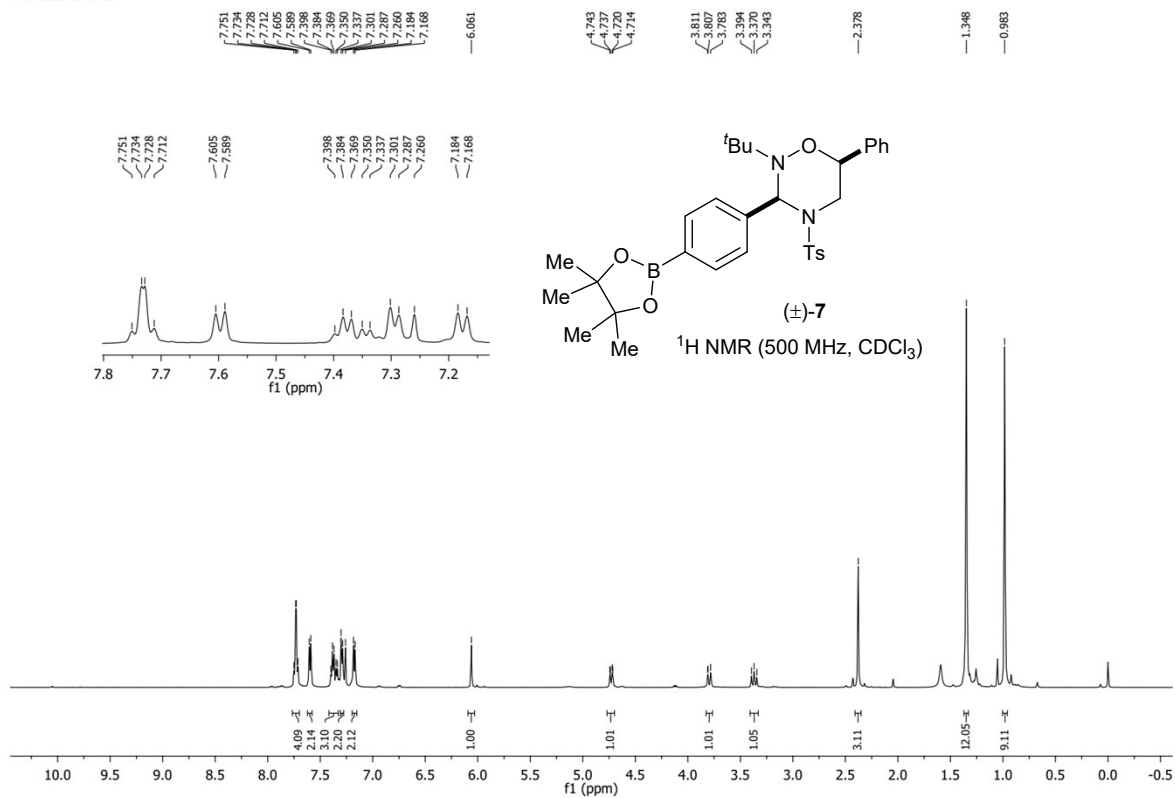

PKM-630-BPIN-13C

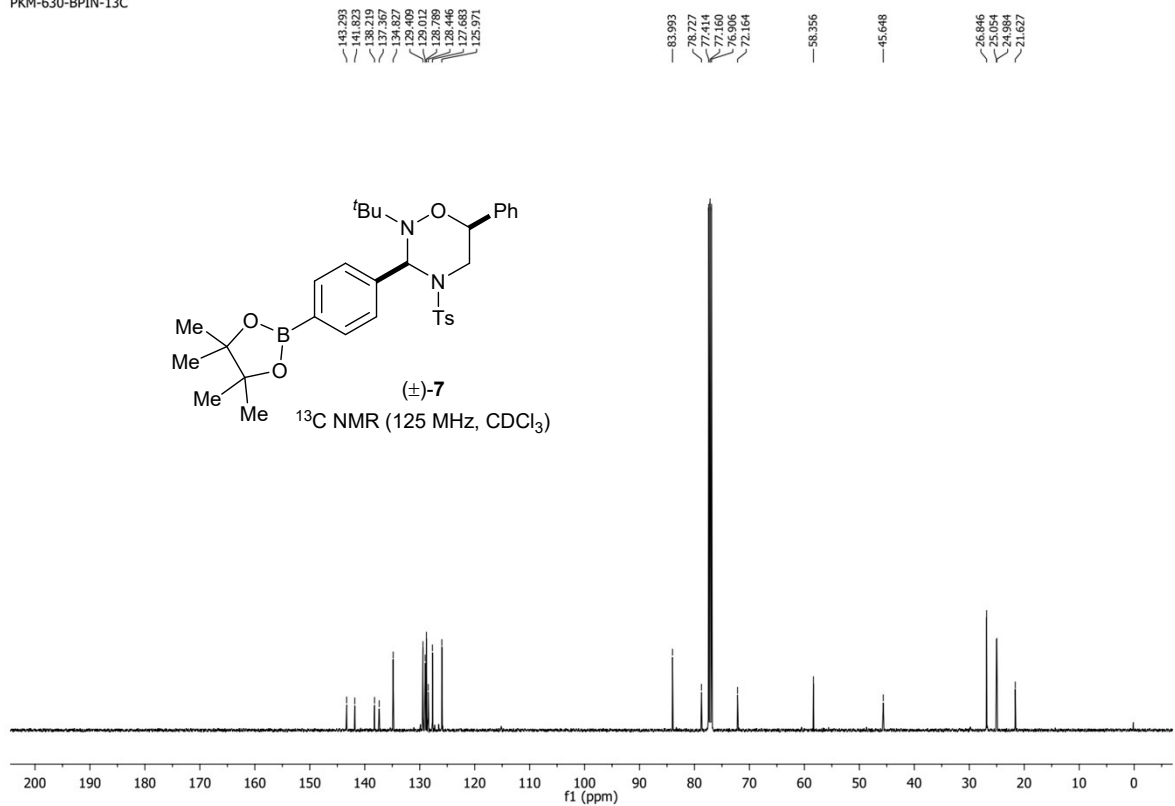

PKM-499-NPR-SESA-APP-1H

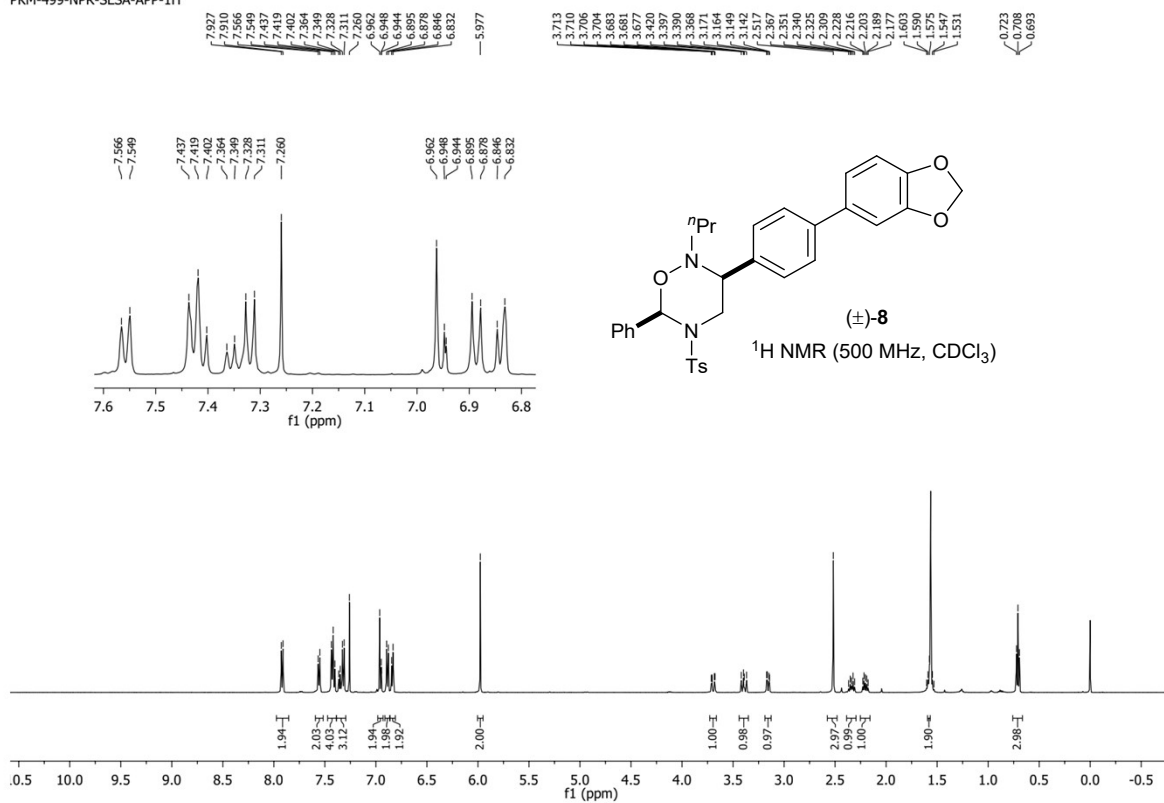

PKM-499-NPR-SESA-APP-13C

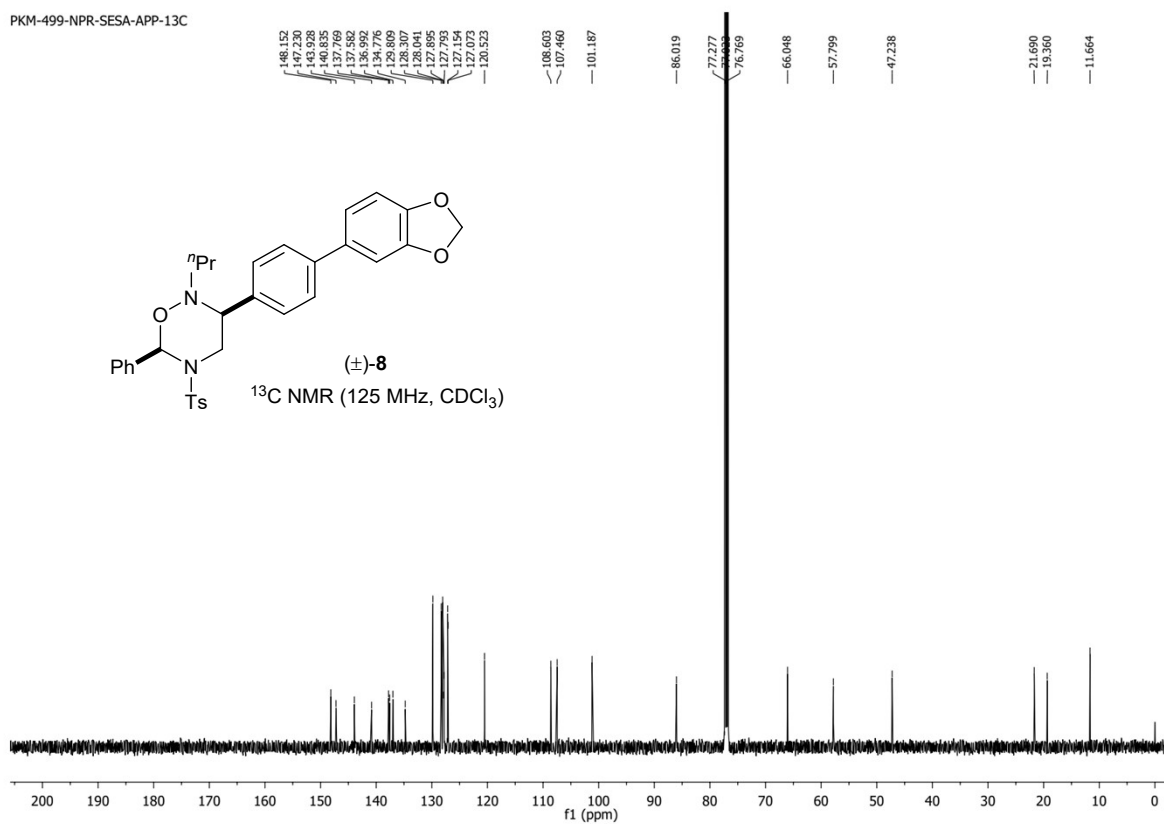

Supplement: d6cc01568a1.pdf [file d6cc01568a1.pdf]
